# Supplementary material for: Isolation and enantiostability of the B-chiral bis(salicylato)borate anions [BR(Sal)2] and [BS(Sal)2]
Source: Royal Society of Chemistry journal article supplement (doi:10.1039/c7ra11997f), 2018-01-01
Supplement: c7ra11997f1.pdf [file c7ra11997f1.pdf]

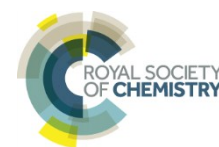

## RSC Advances

### Isolation and enantiostability of the B-chiral bis(salicylato)borate anions $[B_R(\text{Sal})_2]$ and $[B_S(\text{Sal})_2]$

Lawrence W-Y. Wong, Alex S-F. Au Yeung, Gemma S-S. Tam, Jack W-H. Kan, Herman H-Y. Sung, Fu Kit Sheong, Zhenyang Lin and Ian D. Williams\*

---

*Department of Chemistry, Hong Kong University of Science and Technology, Clear Water Bay, Kowloon, Hong Kong, China.*

### Supporting Information

- 1. Supplemental Figures**
  - S1. Sparteinium Monocation in 2**
  - S2. 2D energy surface for 'hinged'  $[B\text{Sal}_2]^-$  conformations**
- 2. Circular Dichroism Spectra**
- 3. Powder X-ray Diffractograms**
- 4. Structure Determination Summaries for 1-5**

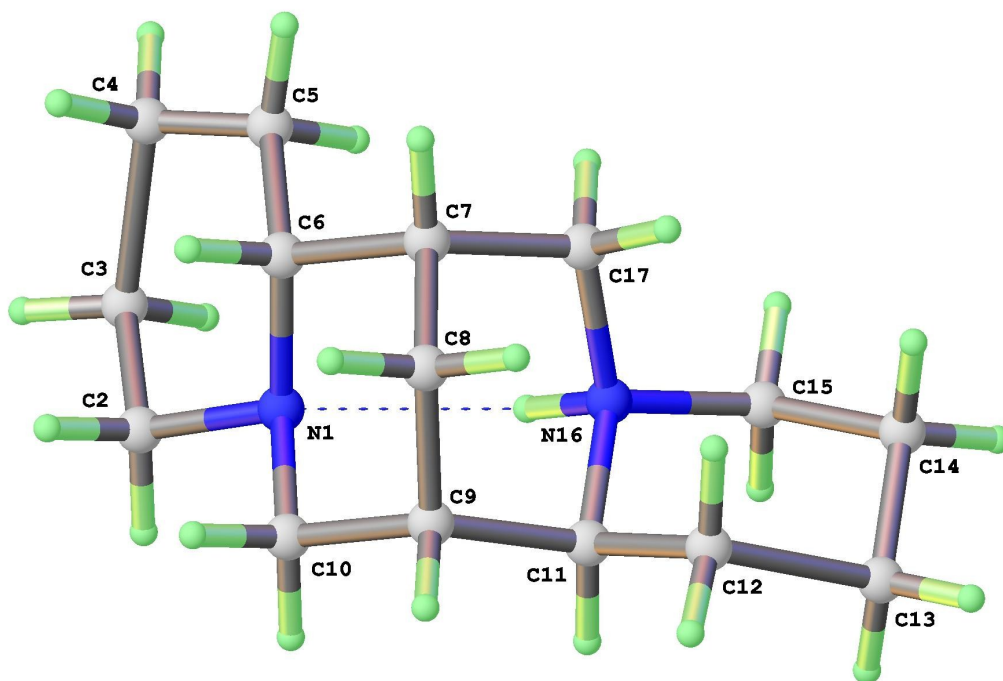

**Figure S1.** [HSpa]<sup>+</sup> monocation in **2** with labelling scheme and chiral centres 6R, 7S, 9S, 11S.

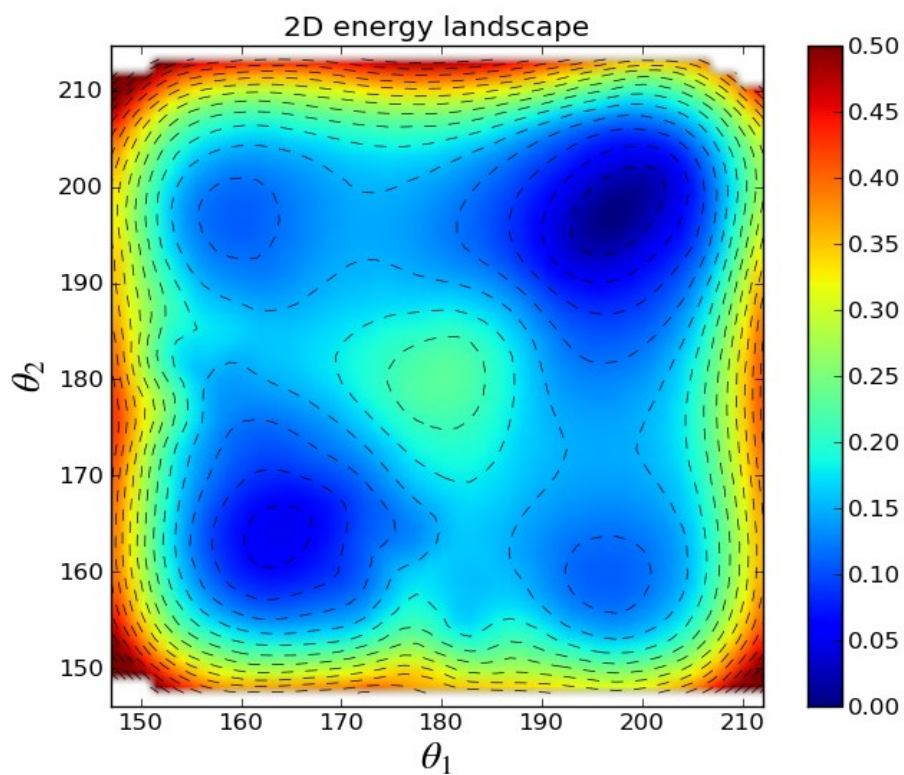

**Figure S2.** 2D energy landscape with  $\theta_1$  and  $\theta_2$  being the two dihedral angles. The dihedral angle on one chelate ring is varied, whilst other held fixed to obtain a 2D potential energy surface.

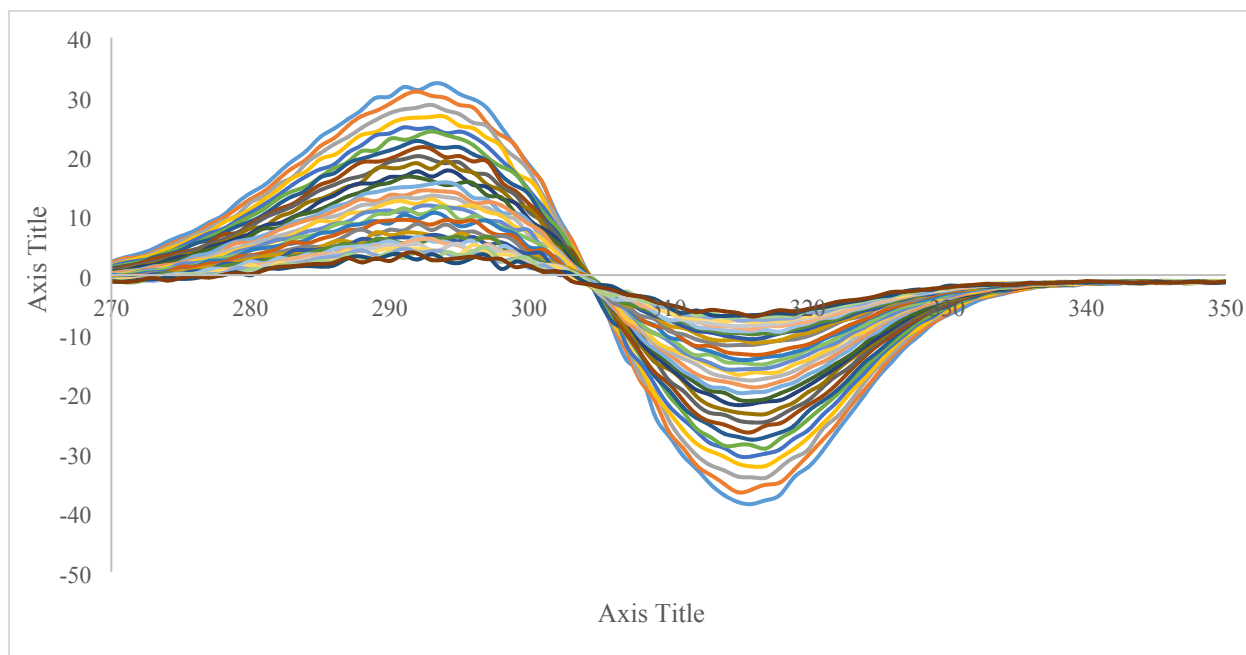

**Figure S3.** CD spectrum showing racemization of [HSpa][B<sub>5</sub>(Sal)<sub>2</sub>] in pure water (10min intervals).

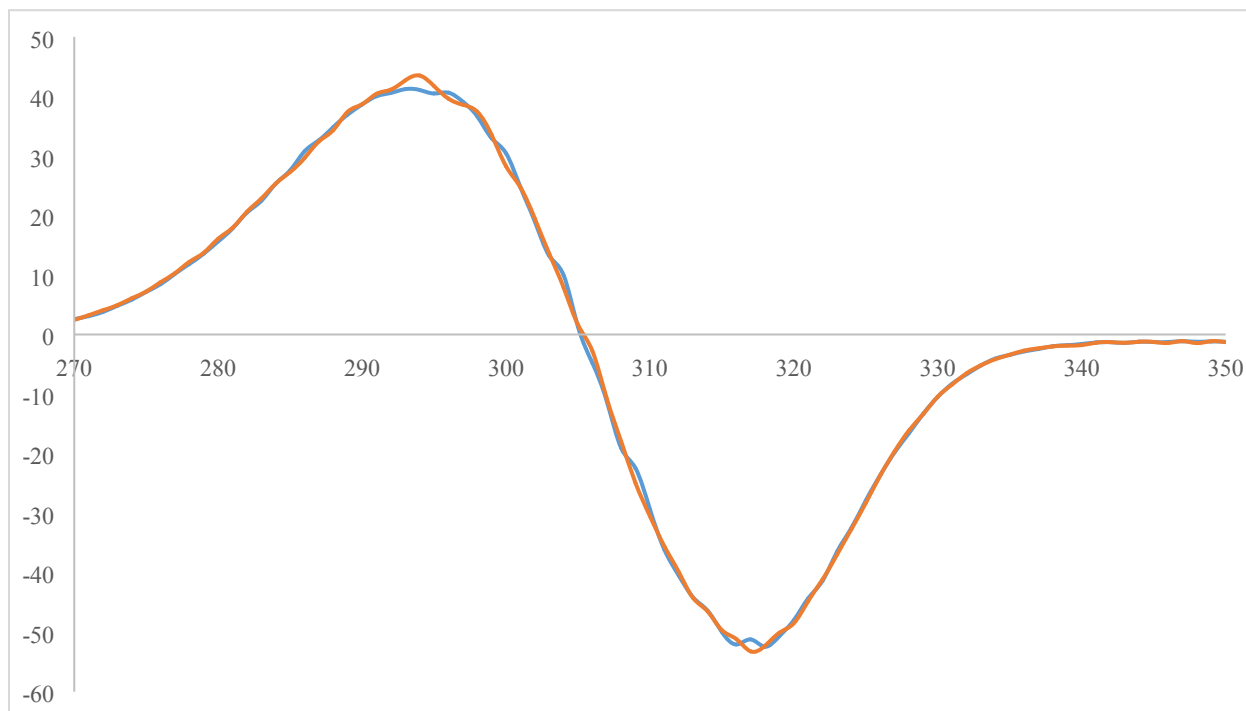

**Figure S4.** CD spectrum showing enantiostability [HSpa][B<sub>5</sub>(Sal)<sub>2</sub>] in DMF/H<sub>2</sub>O (4:1) solution (1 week).

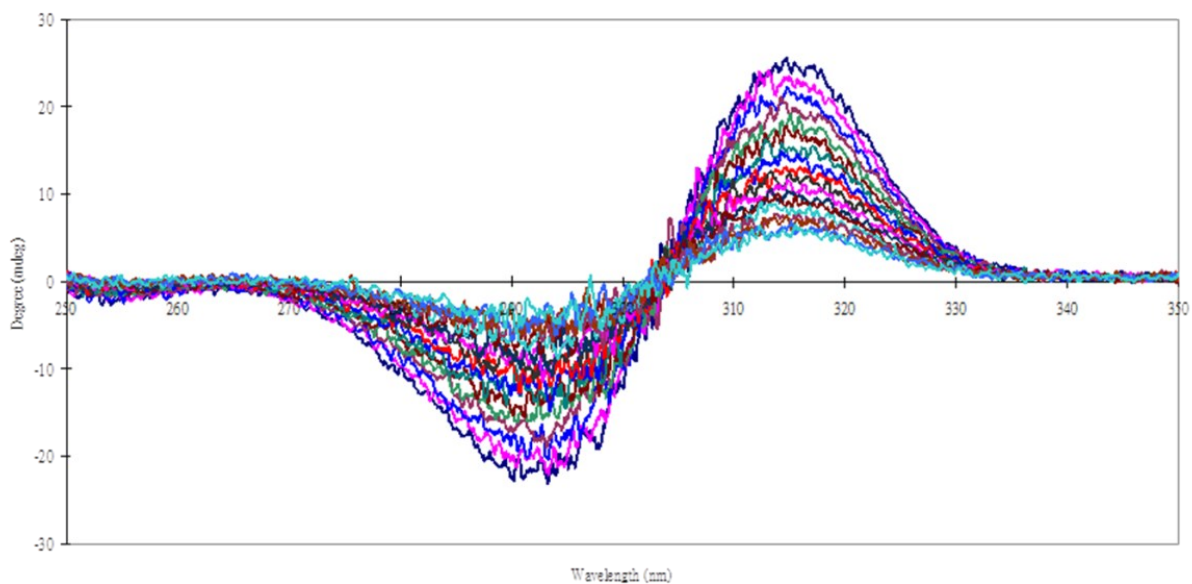

**Figure S5.** CD spectrum showing racemization of  $[H_2Spa][B_R(Sal)_2]_2$  in pure water (5min intervals). Note sparteinium ion has little spectral contribution in range 250-350nm and can be ignored

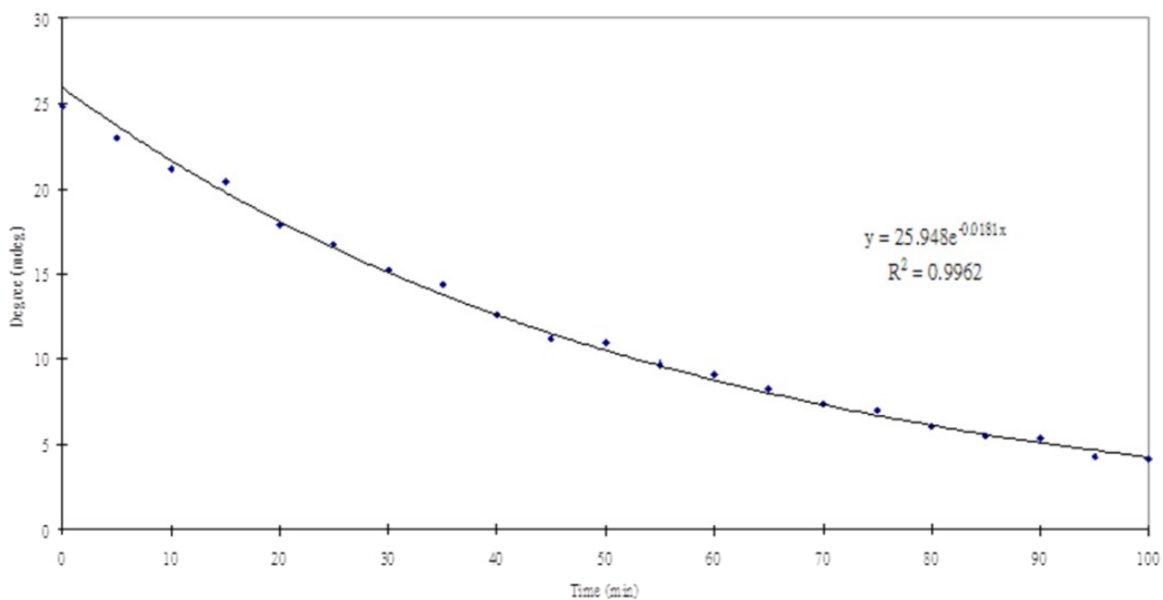

**Figure S6.** Plot showing kinetics of racemization at boron for  $[H_2Spa][B_R(Sal)_2]_2$  in aqueous solution from CD trough at 282nm. Half-life  $t_{1/2} = 40$  mins

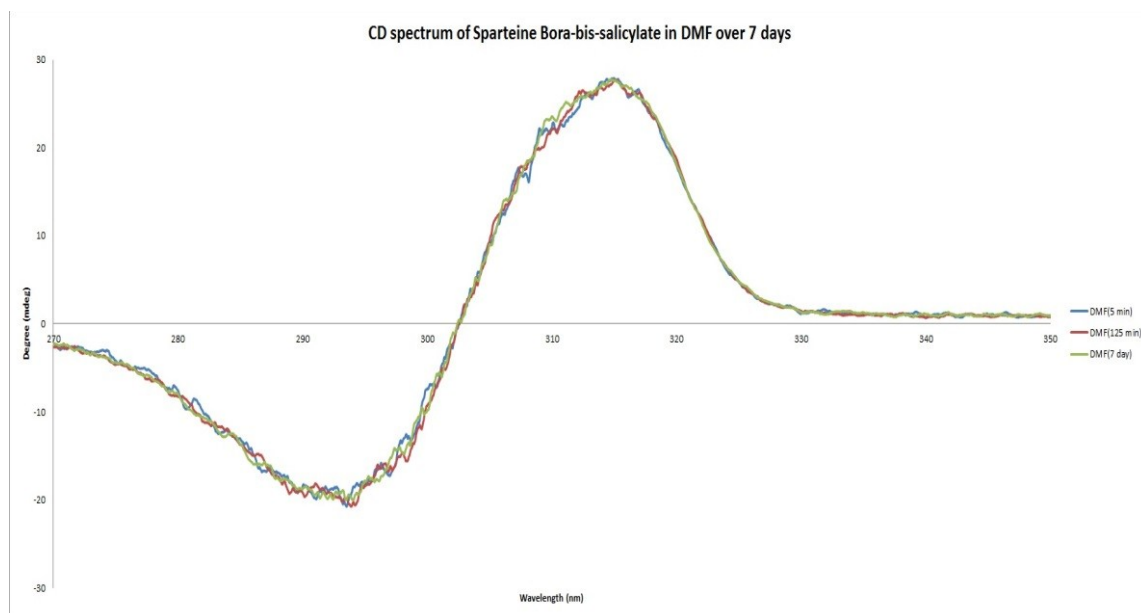

**Figure S7.** CD spectrum showing enantiostability  $[H_2Spa][B_R(Sal)_2]_2$  in pure DMF solution (1 week).

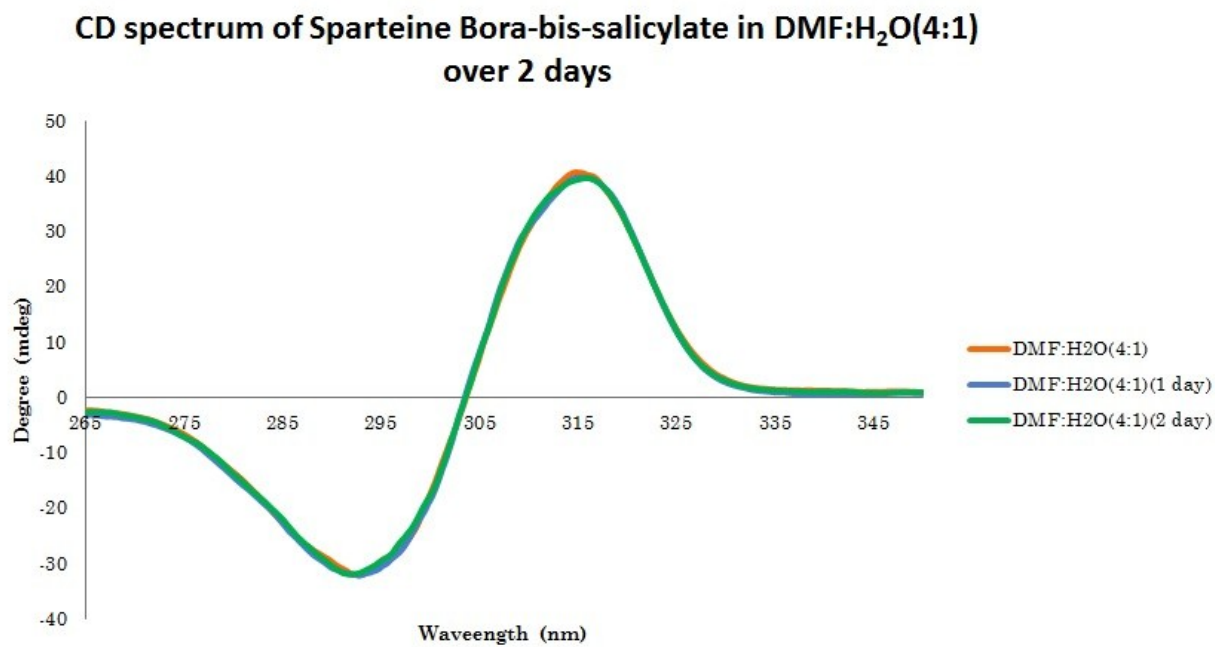

**Figure S8.** CD spectrum showing enantiostability  $[H_2Spa][B_R(Sal)_2]_2$  solution in DMF/H<sub>2</sub>O (4:1) mixture over 2 days.

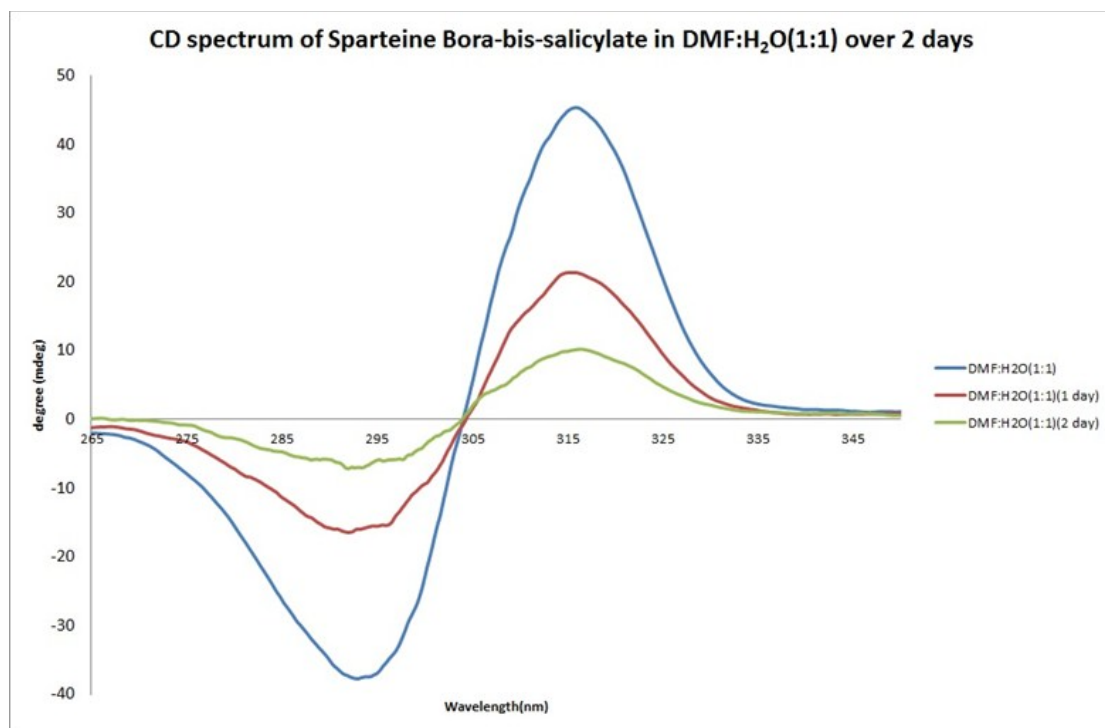

**Figure S9.** CD spectra showing  $B_R$  racemization of  $[H_2Spa][B_R(Sal)_2]_2$  DMF/ $H_2O$  (1:1) solution ( $t_{1/2}$  = ca. 18h)

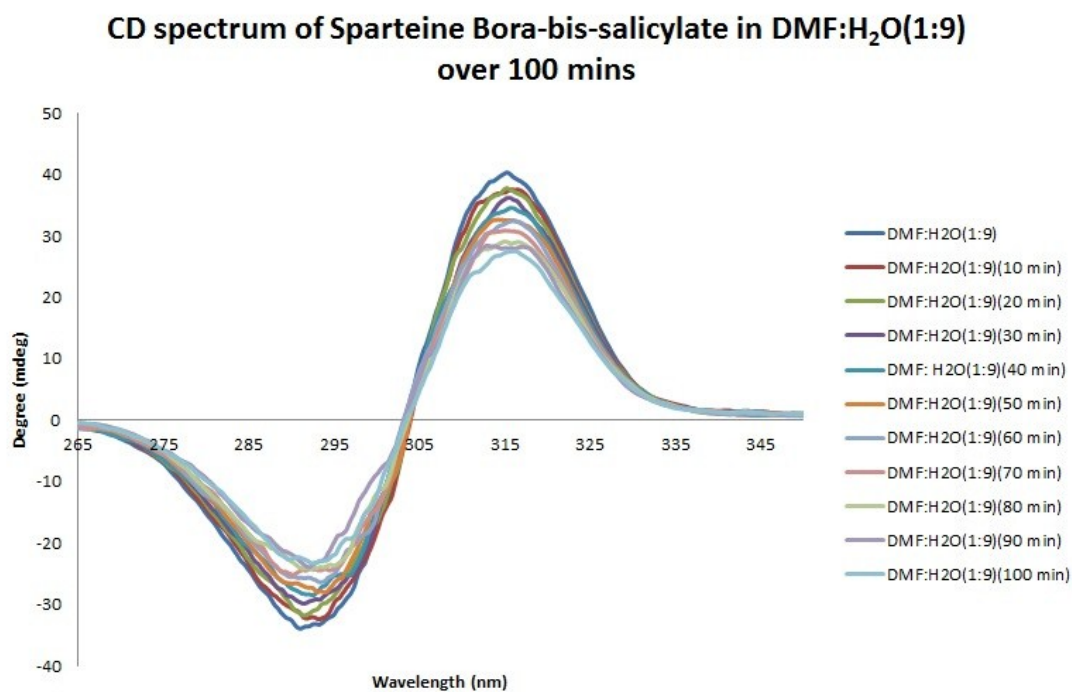

**Figure S10.** CD spectra showing  $B_R$  racemization of **3**  $[H_2Spa][B_R(Sal)_2]_2$  in DMF/ $H_2O$  (1:9) soln ( $t_{1/2}$  = ca. 2h)

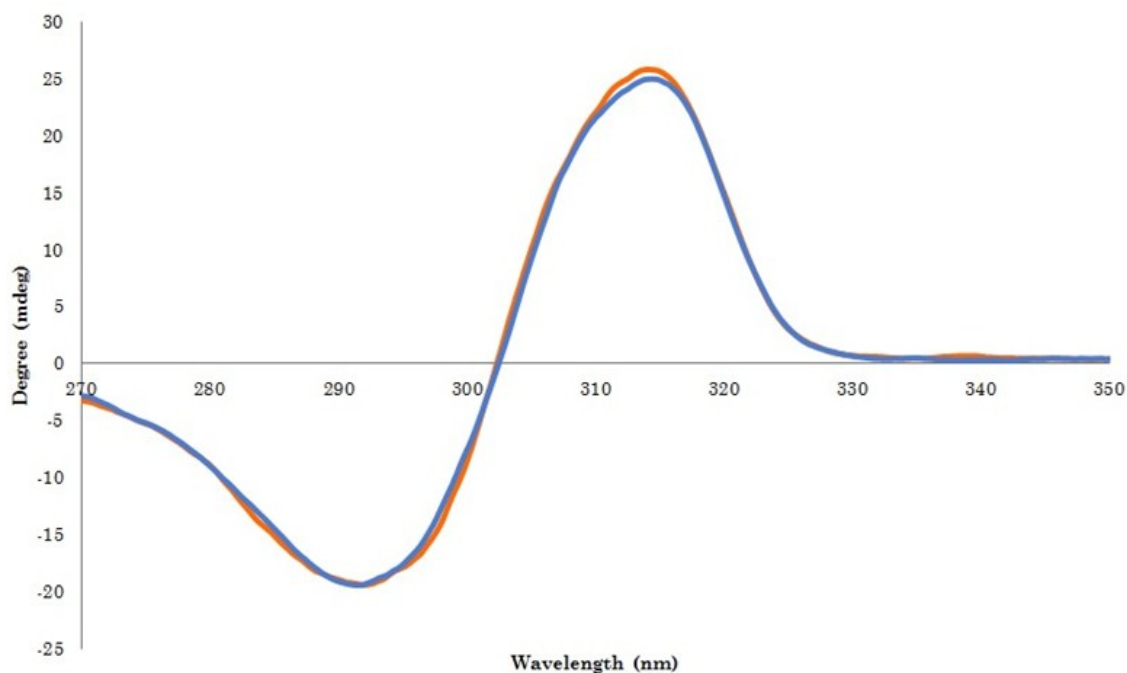

**Figure S11.** CD spectra showing retention of B<sub>R</sub> chirality in [H<sub>2</sub>Spa][B<sub>R</sub>(Sal)<sub>2</sub>]<sub>2</sub> **3** (red) after metathesis crystallization to [NBu<sub>4</sub>][B<sub>R</sub>(Sal)<sub>2</sub>]<sub>2</sub> **4** (blue)

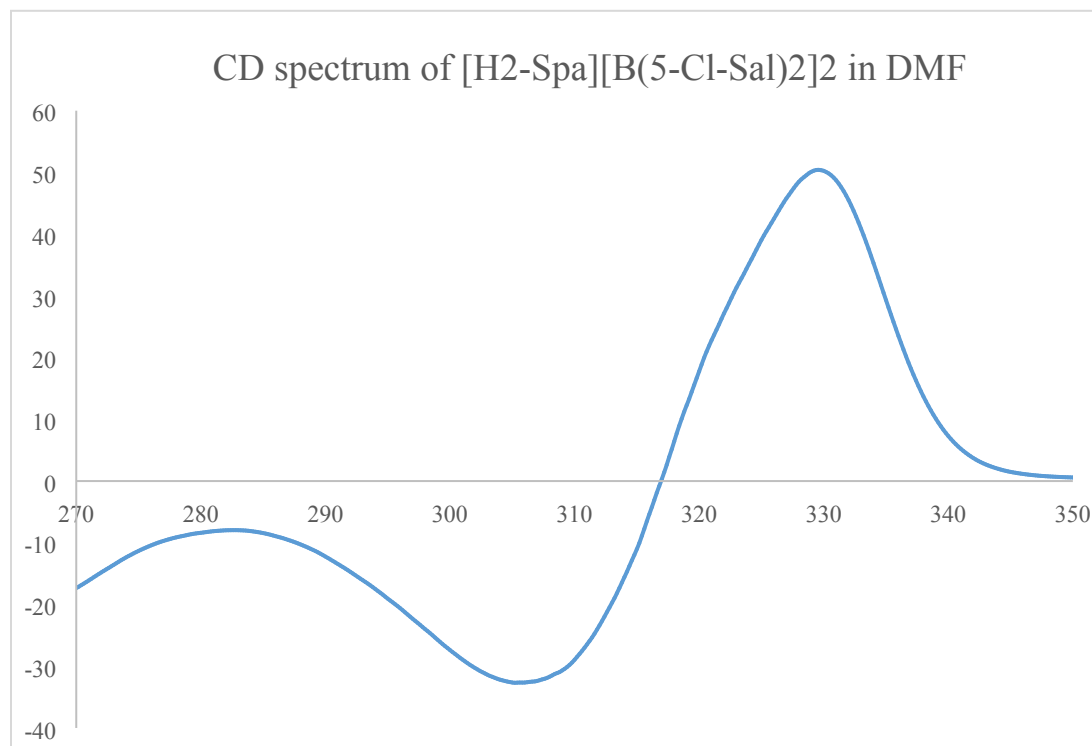

**Figure S12.** CD spectrum of [H<sub>2</sub>-Spa][B(5-Cl-Sal)<sub>2</sub>]<sub>2</sub> **5** (after dehydration) in DMF.

## Powder X-ray Diffractograms

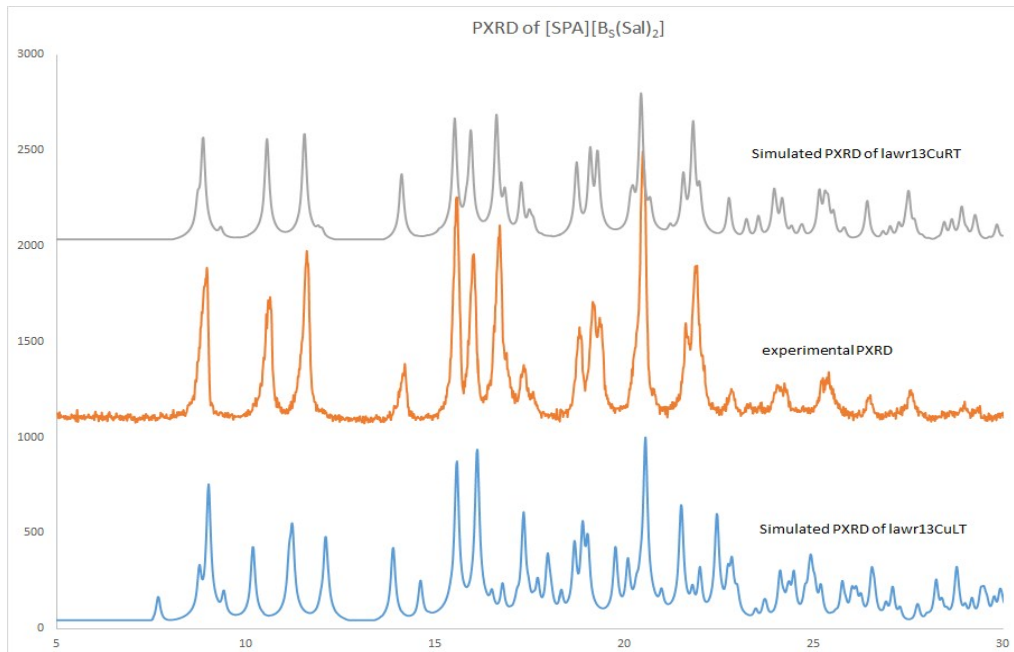

**Figure S13.** Powder X-ray diffractograms of isolated compound [H-Spa][B<sub>5</sub>(Sal)<sub>2</sub>] **2** with those simulated from single crystal structures **2** and **2-RT** - the powder pattern at RT is different from the low T structure of **2** due to an orthorhombic-monoclinic phase transition upon cooling.

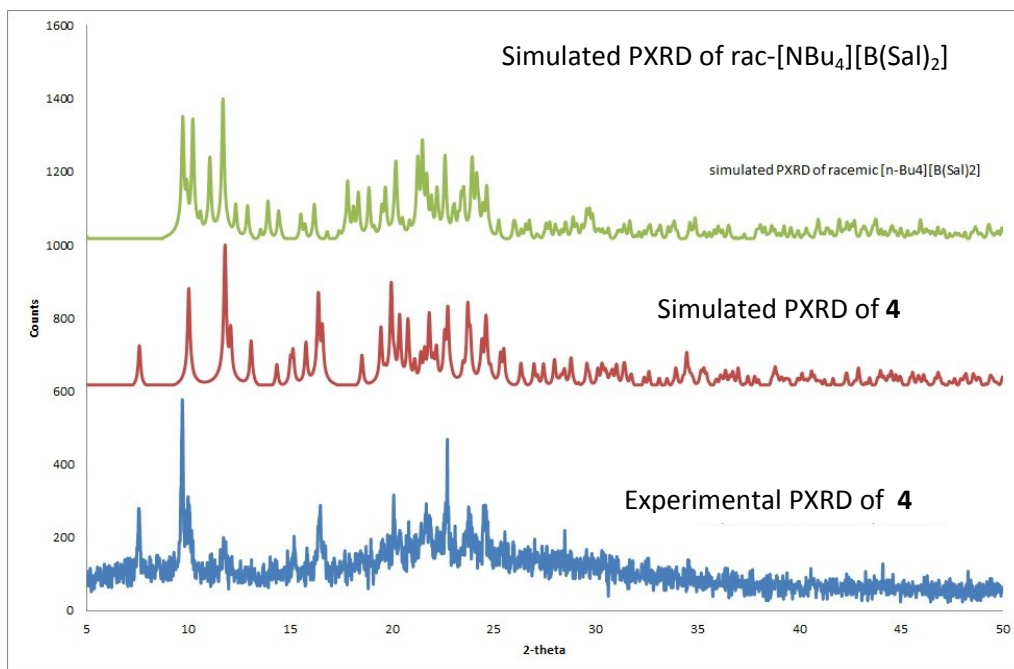

**Figure S14.** Powder diffractogram of **4** [NBu<sub>4</sub>][B<sub>R</sub>(Sal)<sub>2</sub>] matches S-XRD of **4** (rather than rac-[NBu<sub>4</sub>][B(Sal)<sub>2</sub>] crystal structure).



## Structure Determination Summaries and Tables for Compounds 1-5.

**Table 1 Crystal data and structure refinement for compound 1.**

|                                             |                                                                |
|---------------------------------------------|----------------------------------------------------------------|
| Identification code                         | alex316a                                                       |
| Empirical formula                           | C <sub>34</sub> H <sub>33</sub> BN <sub>2</sub> O <sub>8</sub> |
| Formula weight                              | 608.43                                                         |
| Temperature/K                               | 99.9(2)                                                        |
| Crystal system                              | triclinic                                                      |
| Space group                                 | P1                                                             |
| a/Å                                         | 7.9518(3)                                                      |
| b/Å                                         | 9.5337(5)                                                      |
| c/Å                                         | 10.5702(3)                                                     |
| α/°                                         | 89.020(3)                                                      |
| β/°                                         | 76.831(3)                                                      |
| γ/°                                         | 65.860(4)                                                      |
| Volume/Å <sup>3</sup>                       | 709.41(6)                                                      |
| Z                                           | 1                                                              |
| ρ <sub>calc</sub> /g/cm <sup>3</sup>        | 1.424                                                          |
| μ/mm <sup>-1</sup>                          | 0.831                                                          |
| F(000)                                      | 320.0                                                          |
| Crystal size/mm <sup>3</sup>                | 0.25 × 0.2 × 0.2                                               |
| Radiation                                   | CuKα (λ = 1.54184)                                             |
| 2θ range for data collection/°              | 8.624 to 134.982                                               |
| Index ranges                                | -9 ≤ h ≤ 9, -10 ≤ k ≤ 11, -12 ≤ l ≤ 12                         |
| Reflections collected                       | 10175                                                          |
| Independent reflections                     | 4775 [R <sub>int</sub> = 0.0175, R <sub>sigma</sub> = 0.0192]  |
| Data/restraints/parameters                  | 4775/3/415                                                     |
| Completeness to theta = 66.5°               | 99.8%                                                          |
| Goodness-of-fit on F <sup>2</sup>           | 1.012                                                          |
| Final R indexes [I ≥ 2σ (I)]                | R <sub>1</sub> = 0.0252, wR <sub>2</sub> = 0.0661              |
| Final R indexes [all data]                  | R <sub>1</sub> = 0.0256, wR <sub>2</sub> = 0.0664              |
| Largest diff. peak/hole / e Å <sup>-3</sup> | 0.17/-0.18                                                     |
| Flack parameter                             | 0.07(5)                                                        |

**Fractional Atomic Coordinates ( $\times 10^4$ ) and Equivalent Isotropic Displacement Parameters ( $\text{\AA}^2 \times 10^3$ ) for compound 1.  $U_{\text{eq}}$  is defined as 1/3 of the trace of the orthogonalised  $U_{\text{IJ}}$  tensor.**

| Atom | <i>x</i>     | <i>y</i>    | <i>z</i>    | U(eq)    |
|------|--------------|-------------|-------------|----------|
| O1   | 4744.2 (19)  | 8238.0 (16) | 4268.4 (14) | 21.0 (3) |
| O2   | 10974.0 (19) | 1158.6 (16) | 4750.7 (14) | 23.1 (3) |
| N1   | 7885 (2)     | 6522.3 (19) | 7993.7 (15) | 19.3 (3) |
| N2   | 7884 (2)     | 6669.6 (18) | 1803.4 (15) | 14.6 (3) |
| C30  | 10662 (3)    | 1121 (2)    | 3479 (2)    | 25.3 (5) |
| C31  | 6785 (3)     | 7837 (2)    | 7624.3 (19) | 20.8 (4) |
| C32  | 6318 (3)     | 8015 (2)    | 6404.7 (19) | 18.7 (4) |
| C33  | 7000 (2)     | 6757 (2)    | 5524.7 (18) | 16.4 (4) |
| C34  | 8215 (3)     | 5301 (2)    | 5868.9 (18) | 15.6 (4) |
| C35  | 9009 (3)     | 3912 (2)    | 5043.6 (18) | 17.1 (4) |
| C36  | 10169 (3)    | 2557 (2)    | 5443.6 (19) | 18.5 (4) |
| C37  | 10612 (3)    | 2529 (2)    | 6672.2 (19) | 20.7 (4) |
| C38  | 9856 (3)     | 3839 (2)    | 7487.5 (19) | 20.3 (4) |
| C39  | 8622 (3)     | 5260 (2)    | 7117.6 (18) | 17.0 (4) |
| C40  | 6447 (2)     | 6904 (2)    | 4227.3 (18) | 15.7 (4) |
| C41  | 8031 (2)     | 7032 (2)    | 3155.5 (17) | 14.4 (4) |
| C42  | 8090 (2)     | 8634 (2)    | 3184.4 (17) | 16.0 (4) |
| C43  | 7788 (2)     | 9353 (2)    | 1904.0 (17) | 15.7 (4) |
| C44  | 5920 (3)     | 9430 (2)    | 1672.4 (19) | 18.2 (4) |
| C45  | 6092 (3)     | 7781 (2)    | 1459.2 (18) | 16.9 (4) |
| C46  | 9564 (3)     | 6694 (2)    | 803.7 (17)  | 16.8 (4) |
| C47  | 9425 (3)     | 8352 (2)    | 749.2 (17)  | 16.2 (4) |
| C48  | 11277 (3)    | 8419 (2)    | 772.7 (18)  | 19.2 (4) |
| C49  | 11920 (3)    | 9354 (3)    | 110 (2)     | 27.1 (4) |
| B1   | 3596 (3)     | 4276 (3)    | 3020 (2)    | 16.5 (4) |
| O10  | 5433 (2)     | 1934.4 (17) | 5447.8 (14) | 27.4 (3) |
| O11  | 4287.7 (18)  | 2918.0 (15) | 3751.8 (13) | 18.8 (3) |
| O12  | 2186.8 (18)  | 5647.8 (15) | 3816.2 (13) | 18.0 (3) |
| O20  | 8078.4 (18)  | 3827.0 (16) | 990.9 (13)  | 19.9 (3) |
| O21  | 5291.8 (18)  | 4603.7 (15) | 2407.0 (13) | 18.3 (3) |
| O22  | 2755.9 (17)  | 3948.1 (15) | 2043.9 (13) | 17.5 (3) |
| C10  | 4550 (3)     | 3056 (2)    | 4941.1 (18) | 19.0 (4) |
| C11  | 3624 (3)     | 4646 (2)    | 5590.6 (19) | 17.9 (4) |
| C12  | 2397 (2)     | 5860 (2)    | 5021.2 (18) | 16.5 (4) |
| C13  | 1376 (3)     | 7315 (2)    | 5702.1 (19) | 19.4 (4) |
| C14  | 1624 (3)     | 7565 (2)    | 6920.8 (19) | 22.3 (4) |
| C15  | 2888 (3)     | 6381 (3)    | 7477 (2)    | 24.0 (4) |
| C16  | 3868 (3)     | 4933 (2)    | 6810.9 (19) | 21.3 (4) |

|     |          |          |              |          |
|-----|----------|----------|--------------|----------|
| C20 | 6499 (2) | 3818 (2) | 1319.3 (18)  | 16.0 (4) |
| C21 | 5792 (3) | 3047 (2) | 504.2 (18)   | 16.2 (4) |
| C22 | 3903 (3) | 3221 (2) | 884.0 (18)   | 15.5 (4) |
| C23 | 3156 (3) | 2664 (2) | 38.5 (19)    | 17.9 (4) |
| C24 | 4309 (3) | 1913 (2) | -1162.1 (18) | 19.7 (4) |
| C25 | 6212 (3) | 1686 (2) | -1529.5 (18) | 20.5 (4) |
| C26 | 6937 (3) | 2258 (2) | -699.7 (19)  | 18.2 (4) |

**Anisotropic Displacement Parameters ( $\text{\AA}^2 \times 10^3$ ) for compound 1. The Anisotropic displacement factor exponent takes the form:  $-2\pi^2[h^2a^{*2}U_{11}+2hka^*b^*U_{12}+\dots]$ .**

| Atom | $U_{11}$  | $U_{22}$  | $U_{33}$  | $U_{23}$ | $U_{13}$  | $U_{12}$  |
|------|-----------|-----------|-----------|----------|-----------|-----------|
| O1   | 13.5 (6)  | 23.8 (8)  | 21.6 (7)  | 4.2 (6)  | -2.0 (5)  | -4.9 (6)  |
| O2   | 26.7 (7)  | 16.6 (7)  | 23.8 (7)  | -1.0 (6) | -7.0 (6)  | -6.1 (6)  |
| N1   | 23.2 (8)  | 22.5 (9)  | 13.9 (7)  | 0.5 (6)  | -1.9 (6)  | -12.7 (7) |
| N2   | 16.1 (7)  | 13.5 (8)  | 15.9 (7)  | 2.1 (6)  | -6.1 (6)  | -6.7 (6)  |
| C30  | 28.3 (10) | 21.9 (11) | 24 (1)    | -4.6 (8) | -4.6 (8)  | -9.4 (9)  |
| C31  | 23.7 (9)  | 20.9 (10) | 17.1 (9)  | -4.8 (7) | 0.3 (7)   | -11.2 (8) |
| C32  | 18.4 (9)  | 17.1 (9)  | 19.5 (9)  | 1.5 (7)  | -1.1 (7)  | -8.3 (7)  |
| C33  | 15.4 (8)  | 19.4 (9)  | 15.7 (9)  | 2.0 (7)  | -1.1 (7)  | -10.0 (7) |
| C34  | 15.1 (8)  | 20.2 (10) | 14.3 (8)  | 2.7 (7)  | -1.7 (6)  | -11.0 (7) |
| C35  | 18.7 (9)  | 20.2 (10) | 13.9 (9)  | 1.4 (7)  | -3.4 (7)  | -9.7 (7)  |
| C36  | 19.4 (9)  | 18.4 (10) | 18.7 (9)  | 0.3 (8)  | -2.4 (7)  | -9.9 (8)  |
| C37  | 21.5 (9)  | 20.8 (10) | 21.6 (9)  | 6.0 (8)  | -7.6 (8)  | -9.3 (8)  |
| C38  | 25.0 (9)  | 24.2 (10) | 16.2 (9)  | 5.7 (8)  | -7.3 (7)  | -13.6 (8) |
| C39  | 18.9 (9)  | 21.5 (10) | 13.4 (8)  | 0.3 (7)  | -1.3 (7)  | -12.5 (8) |
| C40  | 14.7 (8)  | 14.5 (9)  | 17.8 (9)  | 2.8 (7)  | -4.1 (7)  | -5.9 (7)  |
| C41  | 15.7 (8)  | 15.7 (9)  | 12.2 (8)  | 0.9 (6)  | -5.2 (6)  | -6.0 (7)  |
| C42  | 18.8 (9)  | 15.6 (9)  | 15.3 (8)  | 0.2 (7)  | -4.5 (7)  | -8.5 (7)  |
| C43  | 17.5 (9)  | 14.0 (9)  | 16.4 (8)  | 1.6 (7)  | -5.3 (7)  | -6.7 (7)  |
| C44  | 17.0 (9)  | 17.0 (9)  | 21.5 (9)  | 4.2 (7)  | -8.3 (7)  | -6.0 (7)  |
| C45  | 16.5 (8)  | 19.2 (9)  | 17.1 (9)  | 4.1 (7)  | -9.1 (6)  | -7.0 (7)  |
| C46  | 18.2 (9)  | 17.8 (9)  | 13.5 (8)  | -0.6 (7) | -2.6 (7)  | -7.3 (7)  |
| C47  | 18.7 (9)  | 18.3 (9)  | 14.0 (8)  | 3.1 (7)  | -5.9 (7)  | -9.1 (7)  |
| C48  | 19.8 (9)  | 21.8 (9)  | 17.2 (9)  | 0.4 (7)  | -6.1 (7)  | -9.0 (7)  |
| C49  | 26.3 (10) | 30.5 (11) | 30.3 (11) | 6.0 (9)  | -8.8 (8)  | -16.7 (9) |
| B1   | 15.8 (9)  | 17.3 (10) | 17.1 (10) | 0.0 (8)  | -3.6 (7)  | -7.5 (8)  |
| O10  | 35.7 (8)  | 19.7 (7)  | 24.3 (7)  | 3.4 (6)  | -13.3 (6) | -6.1 (6)  |
| O11  | 21.4 (6)  | 17.4 (7)  | 16.8 (6)  | 0.0 (5)  | -6.2 (5)  | -6.5 (5)  |
| O12  | 17.0 (6)  | 18.9 (7)  | 16.1 (6)  | -1.0 (5) | -4.7 (5)  | -5.1 (5)  |
| O20  | 18.5 (7)  | 19.6 (7)  | 23.4 (7)  | -1.5 (5) | -3.6 (5)  | -10.2 (5) |
| O21  | 18.6 (6)  | 19.4 (7)  | 18.0 (6)  | -2.5 (5) | -4.0 (5)  | -8.9 (5)  |
| O22  | 15.4 (6)  | 20.2 (7)  | 16.6 (6)  | -1.2 (5) | -4.2 (5)  | -6.8 (5)  |
| C10  | 19.3 (9)  | 21.1 (10) | 17.5 (9)  | 2.3 (8)  | -5.4 (7)  | -8.9 (8)  |
| C11  | 17.6 (8)  | 20.2 (10) | 16.8 (9)  | 2.6 (7)  | -1.8 (7)  | -10.1 (7) |
| C12  | 15.2 (8)  | 21.3 (10) | 14.7 (9)  | 1.2 (7)  | -1.2 (7)  | -10.4 (7) |
| C13  | 16.8 (9)  | 18.6 (9)  | 20.8 (9)  | 0.4 (7)  | 0.2 (7)   | -7.7 (7)  |
| C14  | 24.1 (10) | 22.6 (10) | 17.8 (9)  | -4.4 (8) | 2.6 (7)   | -11.1 (8) |
| C15  | 30 (1)    | 29.7 (11) | 14.8 (9)  | -0.1 (8) | -2.3 (7)  | -16.6 (9) |
| C16  | 26.8 (10) | 23.3 (10) | 17.8 (10) | 4.5 (8)  | -6.3 (8)  | -13.9 (8) |
| C20  | 17.6 (9)  | 14.0 (9)  | 17.0 (9)  | 3.4 (7)  | -6.2 (7)  | -6.2 (7)  |

|     |           |          |          |         |           |          |
|-----|-----------|----------|----------|---------|-----------|----------|
| C21 | 18.9 (9)  | 13.2 (9) | 18.4 (9) | 4.6 (7) | -6.3 (7)  | -7.8 (7) |
| C22 | 19.1 (9)  | 10.9 (8) | 17.0 (9) | 3.2 (7) | -6.5 (7)  | -5.6 (7) |
| C23 | 18.8 (8)  | 17.1 (9) | 20.2 (9) | 3.7 (7) | -9.1 (7)  | -7.5 (7) |
| C24 | 26.9 (10) | 17.0 (9) | 19.6 (9) | 3.5 (7) | -13.7 (8) | -9.3 (8) |
| C25 | 27.3 (10) | 16.6 (9) | 15.6 (9) | 1.8 (7) | -4.4 (7)  | -7.8 (8) |
| C26 | 19.5 (9)  | 15.5 (9) | 19.7 (9) | 3.5 (7) | -4.2 (7)  | -7.6 (7) |

**Bond Lengths for compound 1.**

| <b>Atom</b> | <b>Atom</b> | <b>Length/Å</b> | <b>Atom</b> | <b>Atom</b> | <b>Length/Å</b> |
|-------------|-------------|-----------------|-------------|-------------|-----------------|
| O1          | C40         | 1.421 (2)       | C48         | C49         | 1.317 (3)       |
| O2          | C30         | 1.425 (2)       | B1          | O11         | 1.468 (3)       |
| O2          | C36         | 1.359 (2)       | B1          | O12         | 1.443 (2)       |
| N1          | C31         | 1.316 (3)       | B1          | O21         | 1.508 (3)       |
| N1          | C39         | 1.365 (3)       | B1          | O22         | 1.451 (2)       |
| N2          | C41         | 1.517 (2)       | O10         | C10         | 1.209 (3)       |
| N2          | C45         | 1.508 (2)       | O11         | C10         | 1.338 (2)       |
| N2          | C46         | 1.511 (2)       | O12         | C12         | 1.351 (2)       |
| C31         | C32         | 1.410 (3)       | O20         | C20         | 1.228 (2)       |
| C32         | C33         | 1.369 (3)       | O21         | C20         | 1.320 (2)       |
| C33         | C34         | 1.427 (3)       | O22         | C22         | 1.348 (2)       |
| C33         | C40         | 1.520 (2)       | C10         | C11         | 1.484 (3)       |
| C34         | C35         | 1.421 (3)       | C11         | C12         | 1.405 (3)       |
| C34         | C39         | 1.425 (2)       | C11         | C16         | 1.395 (3)       |
| C35         | C36         | 1.372 (3)       | C12         | C13         | 1.395 (3)       |
| C36         | C37         | 1.418 (3)       | C13         | C14         | 1.385 (3)       |
| C37         | C38         | 1.361 (3)       | C14         | C15         | 1.396 (3)       |
| C38         | C39         | 1.421 (3)       | C15         | C16         | 1.383 (3)       |
| C40         | C41         | 1.535 (3)       | C20         | C21         | 1.476 (3)       |
| C41         | C42         | 1.547 (3)       | C21         | C22         | 1.403 (3)       |
| C42         | C43         | 1.530 (3)       | C21         | C26         | 1.400 (3)       |
| C43         | C44         | 1.532 (2)       | C22         | C23         | 1.396 (3)       |
| C43         | C47         | 1.548 (2)       | C23         | C24         | 1.388 (3)       |
| C44         | C45         | 1.538 (3)       | C24         | C25         | 1.399 (3)       |
| C46         | C47         | 1.540 (3)       | C25         | C26         | 1.380 (3)       |
| C47         | C48         | 1.506 (3)       |             |             |                 |

**Bond Angles for compound 1.**

| <b>Atom Atom Atom</b> | <b>Angle/°</b> | <b>Atom Atom Atom</b> | <b>Angle/°</b> |
|-----------------------|----------------|-----------------------|----------------|
| C36 O2 C30            | 116.90 (15)    | C49 C48 C47           | 124.03 (19)    |
| C31 N1 C39            | 116.73 (16)    | O11 B1 O21            | 106.61 (15)    |
| C45 N2 C41            | 113.74 (13)    | O12 B1 O11            | 114.05 (16)    |
| C45 N2 C46            | 108.33 (14)    | O12 B1 O21            | 107.55 (16)    |
| C46 N2 C41            | 109.23 (13)    | O12 B1 O22            | 107.65 (15)    |
| N1 C31 C32            | 124.52 (17)    | O22 B1 O11            | 109.33 (16)    |
| C33 C32 C31           | 119.72 (18)    | O22 B1 O21            | 111.70 (16)    |
| C32 C33 C34           | 118.19 (17)    | C10 O11 B1            | 120.76 (15)    |
| C32 C33 C40           | 120.77 (17)    | C12 O12 B1            | 116.98 (14)    |
| C34 C33 C40           | 121.03 (16)    | C20 O21 B1            | 120.87 (15)    |
| C35 C34 C33           | 123.57 (17)    | C22 O22 B1            | 118.59 (15)    |
| C35 C34 C39           | 119.10 (17)    | O10 C10 O11           | 120.89 (17)    |
| C39 C34 C33           | 117.33 (17)    | O10 C10 C11           | 123.56 (17)    |
| C36 C35 C34           | 120.12 (17)    | O11 C10 C11           | 115.49 (16)    |
| O2 C36 C35            | 125.28 (17)    | C12 C11 C10           | 120.31 (17)    |
| O2 C36 C37            | 114.10 (17)    | C16 C11 C10           | 120.32 (18)    |
| C35 C36 C37           | 120.62 (17)    | C16 C11 C12           | 119.24 (18)    |
| C38 C37 C36           | 120.47 (18)    | O12 C12 C11           | 121.09 (16)    |
| C37 C38 C39           | 120.56 (18)    | O12 C12 C13           | 119.01 (17)    |
| N1 C39 C34            | 123.47 (18)    | C13 C12 C11           | 119.90 (17)    |
| N1 C39 C38            | 117.44 (17)    | C14 C13 C12           | 119.71 (18)    |
| C38 C39 C34           | 119.08 (17)    | C13 C14 C15           | 120.89 (18)    |
| O1 C40 C33            | 111.66 (15)    | C16 C15 C14           | 119.23 (19)    |
| O1 C40 C41            | 108.03 (15)    | C15 C16 C11           | 120.97 (19)    |
| C33 C40 C41           | 109.58 (14)    | O20 C20 O21           | 120.22 (17)    |
| N2 C41 C40            | 111.93 (14)    | O20 C20 C21           | 123.12 (17)    |
| N2 C41 C42            | 107.62 (14)    | O21 C20 C21           | 116.52 (16)    |
| C40 C41 C42           | 114.02 (14)    | C22 C21 C20           | 119.69 (16)    |
| C43 C42 C41           | 109.90 (14)    | C26 C21 C20           | 120.48 (17)    |
| C42 C43 C44           | 109.48 (15)    | C26 C21 C22           | 119.59 (17)    |
| C42 C43 C47           | 110.16 (14)    | O22 C22 C21           | 121.72 (17)    |
| C44 C43 C47           | 108.27 (15)    | O22 C22 C23           | 118.36 (17)    |
| C43 C44 C45           | 109.11 (14)    | C23 C22 C21           | 119.90 (17)    |
| N2 C45 C44            | 108.48 (14)    | C24 C23 C22           | 119.42 (18)    |
| N2 C46 C47            | 109.92 (14)    | C23 C24 C25           | 121.06 (17)    |
| C46 C47 C43           | 107.49 (14)    | C26 C25 C24           | 119.33 (17)    |
| C48 C47 C43           | 112.22 (15)    | C25 C26 C21           | 120.64 (18)    |
| C48 C47 C46           | 111.97 (15)    |                       |                |

**Hydrogen Bonds for compound 1.**

| <b>D</b> | <b>H</b> | <b>A</b> | <b>d(D-H)/Å</b> | <b>d(H-A)/Å</b> | <b>d(D-A)/Å</b> | <b>D-H-A/°</b> |
|----------|----------|----------|-----------------|-----------------|-----------------|----------------|
| N2       | H2       | O20      | 0.91 (3)        | 1.91 (3)        | 2.790 (2)       | 160 (2)        |



**Torsion Angles for compound 1.**

| A   | B   | C   | D   | Angle/°      | A   | B   | C   | D   | Angle/°      |
|-----|-----|-----|-----|--------------|-----|-----|-----|-----|--------------|
| O1  | C40 | C41 | N2  | -76.48 (18)  | C46 | N2  | C45 | C44 | -68.16 (17)  |
| O1  | C40 | C41 | C42 | 45.98 (19)   | C46 | C47 | C48 | C49 | 143.28 (19)  |
| O2  | C36 | C37 | C38 | -178.00 (17) | C47 | C43 | C44 | C45 | 54.52 (19)   |
| N1  | C31 | C32 | C33 | 1.3 (3)      | B1  | O11 | C10 | O10 | -166.43 (18) |
| N2  | C41 | C42 | C43 | 5.48 (18)    | B1  | O11 | C10 | C11 | 16.1 (2)     |
| N2  | C46 | C47 | C43 | 9.34 (18)    | B1  | O12 | C12 | C11 | -15.3 (2)    |
| N2  | C46 | C47 | C48 | 133.02 (15)  | B1  | O12 | C12 | C13 | 164.47 (17)  |
| C30 | O2  | C36 | C35 | 3.5 (3)      | B1  | O21 | C20 | O20 | -163.05 (17) |
| C30 | O2  | C36 | C37 | -176.96 (16) | B1  | O21 | C20 | C21 | 21.2 (2)     |
| C31 | N1  | C39 | C34 | -1.8 (3)     | B1  | O22 | C22 | C21 | -12.6 (3)    |
| C31 | N1  | C39 | C38 | 178.30 (17)  | B1  | O22 | C22 | C23 | 168.82 (17)  |
| C31 | C32 | C33 | C34 | -1.7 (3)     | O10 | C10 | C11 | C12 | -170.76 (19) |
| C31 | C32 | C33 | C40 | 177.24 (16)  | O10 | C10 | C11 | C16 | 5.2 (3)      |
| C32 | C33 | C34 | C35 | 179.85 (17)  | O11 | B1  | O12 | C12 | 36.2 (2)     |
| C32 | C33 | C34 | C39 | 0.5 (3)      | O11 | B1  | O21 | C20 | 80.74 (19)   |
| C32 | C33 | C40 | O1  | -21.1 (2)    | O11 | B1  | O22 | C22 | -84.8 (2)    |
| C32 | C33 | C40 | C41 | 98.57 (19)   | O11 | C10 | C11 | C12 | 6.7 (3)      |
| C33 | C34 | C35 | C36 | 179.89 (17)  | O11 | C10 | C11 | C16 | -177.40 (16) |
| C33 | C34 | C39 | N1  | 1.3 (3)      | O12 | B1  | O11 | C10 | -37.7 (2)    |
| C33 | C34 | C39 | C38 | -178.78 (16) | O12 | B1  | O21 | C20 | -156.54 (15) |
| C33 | C40 | C41 | N2  | 161.67 (15)  | O12 | B1  | O22 | C22 | 150.85 (15)  |
| C33 | C40 | C41 | C42 | -75.87 (18)  | O12 | C12 | C13 | C14 | -177.87 (17) |
| C34 | C33 | C40 | O1  | 157.83 (16)  | O20 | C20 | C21 | C22 | -173.46 (18) |
| C34 | C33 | C40 | C41 | -82.5 (2)    | O20 | C20 | C21 | C26 | 0.9 (3)      |
| C34 | C35 | C36 | O2  | 178.60 (17)  | O21 | B1  | O11 | C10 | 80.88 (19)   |
| C34 | C35 | C36 | C37 | -0.9 (3)     | O21 | B1  | O12 | C12 | -81.82 (19)  |
| C35 | C34 | C39 | N1  | -178.08 (16) | O21 | B1  | O22 | C22 | 33.0 (2)     |
| C35 | C34 | C39 | C38 | 1.8 (3)      | O21 | C20 | C21 | C22 | 2.2 (2)      |
| C35 | C36 | C37 | C38 | 1.6 (3)      | O21 | C20 | C21 | C26 | 176.54 (16)  |
| C36 | C37 | C38 | C39 | -0.5 (3)     | O22 | B1  | O11 | C10 | -158.23 (15) |
| C37 | C38 | C39 | N1  | 178.70 (17)  | O22 | B1  | O12 | C12 | 157.68 (15)  |
| C37 | C38 | C39 | C34 | -1.2 (3)     | O22 | B1  | O21 | C20 | -38.6 (2)    |
| C39 | N1  | C31 | C32 | 0.5 (3)      | O22 | C22 | C23 | C24 | 179.94 (16)  |
| C39 | C34 | C35 | C36 | -0.8 (3)     | C10 | C11 | C12 | O12 | -7.0 (3)     |
| C40 | C33 | C34 | C35 | 0.9 (3)      | C10 | C11 | C12 | C13 | 173.18 (17)  |
| C40 | C33 | C34 | C39 | -178.44 (16) | C10 | C11 | C16 | C15 | -174.44 (18) |
| C40 | C41 | C42 | C43 | -119.31 (16) | C11 | C12 | C13 | C14 | 1.9 (3)      |
| C41 | N2  | C45 | C44 | 53.50 (19)   | C12 | C11 | C16 | C15 | 1.5 (3)      |
| C41 | N2  | C46 | C47 | -68.07 (17)  | C12 | C13 | C14 | C15 | 0.3 (3)      |
| C41 | C42 | C43 | C44 | 55.84 (18)   | C13 | C14 | C15 | C16 | -1.5 (3)     |

|                 |              |                 |              |
|-----------------|--------------|-----------------|--------------|
| C41 C42 C43 C47 | -63.11 (18)  | C14 C15 C16 C11 | 0.6 (3)      |
| C42 C43 C44 C45 | -65.59 (19)  | C16 C11 C12 O12 | 176.98 (17)  |
| C42 C43 C47 C46 | 53.80 (18)   | C16 C11 C12 C13 | -2.8 (3)     |
| C42 C43 C47 C48 | -69.7 (2)    | C20 C21 C22 O22 | -6.8 (3)     |
| C43 C44 C45 N2  | 10.6 (2)     | C20 C21 C22 C23 | 171.74 (17)  |
| C43 C47 C48 C49 | -95.7 (2)    | C20 C21 C26 C25 | -172.65 (17) |
| C44 C43 C47 C46 | -65.89 (18)  | C21 C22 C23 C24 | 1.3 (3)      |
| C44 C43 C47 C48 | 170.58 (15)  | C22 C21 C26 C25 | 1.7 (3)      |
| C45 N2 C41 C40  | 63.24 (19)   | C22 C23 C24 C25 | 1.0 (3)      |
| C45 N2 C41 C42  | -62.80 (18)  | C23 C24 C25 C26 | -1.9 (3)     |
| C45 N2 C46 C47  | 56.31 (18)   | C24 C25 C26 C21 | 0.6 (3)      |
| C46 N2 C41 C40  | -175.61 (15) | C26 C21 C22 O22 | 178.80 (17)  |
| C46 N2 C41 C42  | 58.36 (17)   | C26 C21 C22 C23 | -2.7 (3)     |

**Hydrogen Atom Coordinates ( $\text{\AA}\times 10^4$ ) and Isotropic Displacement Parameters ( $\text{\AA}^2\times 10^3$ ) for compound 1.**

| <b>Atom</b> | <b><i>x</i></b> | <b><i>y</i></b> | <b><i>z</i></b> | <b>U(eq)</b> |
|-------------|-----------------|-----------------|-----------------|--------------|
| H1          | 3850 (50)       | 8150 (40)       | 4800 (40)       | 51 (9)       |
| H2          | 7910 (40)       | 5700 (30)       | 1740 (20)       | 24 (6)       |
| H30A        | 11068           | 1842            | 2966            | 38           |
| H30B        | 9308            | 1419            | 3547            | 38           |
| H30C        | 11396           | 75              | 3048            | 38           |
| H31         | 6269            | 8728            | 8221            | 25           |
| H32         | 5534            | 9004            | 6194            | 22           |
| H35         | 8737            | 3922            | 4213            | 21           |
| H37         | 11442           | 1588            | 6928            | 25           |
| H38         | 10156           | 3804            | 8311            | 24           |
| H40         | 6268            | 5967            | 4006            | 19           |
| H41         | 9272            | 6254            | 3282            | 17           |
| H42A        | 7086            | 9316            | 3924            | 19           |
| H42B        | 9334            | 8523            | 3310            | 19           |
| H43         | 7738            | 10417           | 1950            | 19           |
| H44A        | 5647            | 9995            | 897             | 22           |
| H44B        | 4863            | 9987            | 2435            | 22           |
| H45A        | 4976            | 7673            | 2017            | 20           |
| H45B        | 6141            | 7555            | 537             | 20           |
| H46A        | 9587            | 6301            | -64             | 20           |
| H46B        | 10757           | 6013            | 1038            | 20           |
| H47         | 9085            | 8746            | -82             | 19           |
| H48         | 12029           | 7746            | 1298            | 23           |
| H49A        | 11201           | 10041           | -425            | 33           |
| H49B        | 13101           | 9341            | 166             | 33           |
| H13         | 516             | 8130            | 5331            | 23           |
| H14         | 924             | 8555            | 7384            | 27           |
| H15         | 3072            | 6568            | 8304            | 29           |
| H16         | 4720            | 4121            | 7190            | 26           |
| H23         | 1870            | 2798            | 283             | 22           |
| H24         | 3796            | 1548            | -1743           | 24           |
| H25         | 6998            | 1143            | -2342           | 25           |
| H26         | 8226            | 2115            | -948            | 22           |

**Table 2 Crystal data and structure refinement for Compound 2.**

|                                             |                                                                |
|---------------------------------------------|----------------------------------------------------------------|
| Identification code                         | lawr13CuLT3                                                    |
| Empirical formula                           | C <sub>29</sub> H <sub>35</sub> BN <sub>2</sub> O <sub>6</sub> |
| Formula weight                              | 518.40                                                         |
| Temperature/K                               | 100.15                                                         |
| Crystal system                              | monoclinic                                                     |
| Space group                                 | P2 <sub>1</sub>                                                |
| a/Å                                         | 11.5542(4)                                                     |
| b/Å                                         | 18.7836(5)                                                     |
| c/Å                                         | 11.9810(4)                                                     |
| α/°                                         | 90                                                             |
| β/°                                         | 95.040(3)                                                      |
| γ/°                                         | 90                                                             |
| Volume/Å <sup>3</sup>                       | 2590.18(14)                                                    |
| Z                                           | 4                                                              |
| ρ <sub>calc</sub> /g/cm <sup>3</sup>        | 1.329                                                          |
| μ/mm <sup>-1</sup>                          | 0.748                                                          |
| F(000)                                      | 1104.0                                                         |
| Crystal size/mm <sup>3</sup>                | 0.1 × 0.1 × 0.1                                                |
| Radiation                                   | CuKα (λ = 1.54184)                                             |
| 2θ range for data collection/°              | 7.408 to 134.946                                               |
| Index ranges                                | -13 ≤ h ≤ 13, -22 ≤ k ≤ 22, -14 ≤ l ≤ 14                       |
| Reflections collected                       | 14696                                                          |
| Independent reflections                     | 14696 [R <sub>int</sub> = ?, R <sub>sigma</sub> = 0.0286]      |
| Data/restraints/parameters                  | 14696/1/694                                                    |
| Completeness to theta = 66.5°               | 100%                                                           |
| Goodness-of-fit on F <sup>2</sup>           | 1.012                                                          |
| Final R indexes [I ≥ 2σ (I)]                | R <sub>1</sub> = 0.0305, wR <sub>2</sub> = 0.0811              |
| Final R indexes [all data]                  | R <sub>1</sub> = 0.0342, wR <sub>2</sub> = 0.0826              |
| Largest diff. peak/hole / e Å <sup>-3</sup> | 0.17/-0.13                                                     |
| Flack parameter                             | -0.01(8)                                                       |

**Fractional Atomic Coordinates ( $\times 10^4$ ) and Equivalent Isotropic Displacement Parameters ( $\text{\AA}^2 \times 10^3$ ) for compound 2.  $U_{\text{eq}}$  is defined as 1/3 of the trace of the orthogonalised  $U_{\text{IJ}}$  tensor.**

| Atom | <i>x</i>    | <i>y</i>    | <i>z</i>    | $U(\text{eq})$ |
|------|-------------|-------------|-------------|----------------|
| N1   | 3444 (2)    | 6223.1 (14) | 171.7 (19)  | 24.0 (5)       |
| N16  | 2001 (2)    | 6212.3 (13) | 1883.2 (19) | 22.7 (5)       |
| C31  | 3894 (3)    | 5799.2 (18) | -765 (2)    | 30.5 (7)       |
| C32  | 4943 (3)    | 6146.7 (19) | -1218 (3)   | 34.2 (8)       |
| C33  | 5907 (3)    | 6266 (2)    | -292 (3)    | 36.3 (8)       |
| C34  | 5453 (3)    | 6724.6 (19) | 629 (3)     | 31.3 (7)       |
| C35  | 4401 (3)    | 6382.3 (18) | 1102 (2)    | 26.8 (7)       |
| C36  | 2764 (3)    | 6870.3 (16) | -240 (2)    | 25.5 (6)       |
| C37  | 2293 (3)    | 7277.6 (17) | 726 (3)     | 25.4 (6)       |
| C38  | 3315 (3)    | 7506.3 (17) | 1538 (3)    | 29.9 (7)       |
| C39  | 3900 (3)    | 6828.8 (18) | 2020 (2)    | 27.4 (6)       |
| C40  | 3016 (3)    | 6413.1 (17) | 2638 (2)    | 26.9 (7)       |
| C41  | 1206 (3)    | 5793.6 (18) | 2517 (2)    | 27.6 (7)       |
| C42  | 136 (3)     | 5560.0 (17) | 1784 (3)    | 28.9 (7)       |
| C43  | -508 (3)    | 6198.6 (18) | 1267 (3)    | 28.7 (7)       |
| C44  | 327 (3)     | 6647.7 (17) | 642 (3)     | 27.5 (7)       |
| C45  | 1423 (3)    | 6848.3 (16) | 1373 (2)    | 23.7 (6)       |
| N1A  | 899 (3)     | 3830.7 (15) | 5162 (2)    | 26.5 (6)       |
| N16A | 2768 (3)    | 3900.5 (14) | 6752 (2)    | 31.0 (6)       |
| C31A | 346 (3)     | 4140.9 (19) | 4089 (2)    | 33.3 (8)       |
| C32A | -887 (3)    | 3881 (2)    | 3815 (3)    | 35.8 (8)       |
| C33A | -1628 (4)   | 4056 (2)    | 4776 (3)    | 42.3 (9)       |
| C34A | -1093 (4)   | 3730 (2)    | 5853 (3)    | 44.1 (9)       |
| C35A | 162 (4)     | 3970.5 (18) | 6137 (3)    | 34.2 (8)       |
| C36A | 1224 (3)    | 3060.6 (18) | 5055 (3)    | 33.9 (7)       |
| C37A | 1815 (3)    | 2774.0 (18) | 6154 (3)    | 36.4 (8)       |
| C38A | 985 (4)     | 2850 (2)    | 7064 (3)    | 46.2 (10)      |
| C39A | 765 (4)     | 3645 (2)    | 7210 (3)    | 43.6 (10)      |
| C40A | 1919 (4)    | 3996 (2)    | 7577 (3)    | 41.8 (9)       |
| C41A | 3855 (4)    | 4264 (2)    | 7135 (3)    | 45.1 (10)      |
| C42A | 4757 (4)    | 4196 (2)    | 6304 (3)    | 46.6 (10)      |
| C43A | 5010 (4)    | 3420 (2)    | 6073 (3)    | 46.2 (10)      |
| C44A | 3866 (3)    | 3047 (2)    | 5690 (3)    | 39.9 (8)       |
| C45A | 2971 (3)    | 3136.9 (18) | 6537 (3)    | 33.3 (8)       |
| O10  | 2118 (2)    | 4801.0 (11) | 154.2 (16)  | 26.5 (5)       |
| O11  | 3717.6 (19) | 4163.1 (11) | 555.5 (16)  | 22.9 (4)       |
| O12  | 3659.7 (19) | 2978.0 (11) | 1393.4 (17) | 24.0 (5)       |
| O20  | 7219 (2)    | 3776.5 (13) | 597 (2)     | 35.1 (5)       |

|      |             |             |             |          |
|------|-------------|-------------|-------------|----------|
| O21  | 5427 (2)    | 3448.1 (12) | 879.6 (17)  | 25.9 (5) |
| O22  | 4486.3 (19) | 3944.7 (11) | 2447.4 (16) | 22.3 (4) |
| C10  | 2587 (3)    | 4255.2 (16) | 545 (2)     | 21.0 (6) |
| C11  | 1917 (3)    | 3662.0 (15) | 983 (2)     | 21.5 (6) |
| C12  | 2504 (3)    | 3051.3 (16) | 1411 (2)    | 21.3 (6) |
| C13  | 1866 (3)    | 2498.6 (17) | 1841 (2)    | 25.9 (6) |
| C14  | 672 (3)     | 2551.8 (17) | 1842 (2)    | 27.6 (7) |
| C15  | 86 (3)      | 3149.3 (18) | 1401 (2)    | 28.2 (7) |
| C16  | 710 (3)     | 3698.9 (16) | 977 (2)     | 23.8 (6) |
| C20  | 6340 (3)    | 3878.6 (17) | 1062 (2)    | 25.5 (6) |
| C21  | 6231 (3)    | 4459.0 (17) | 1882 (2)    | 23.5 (6) |
| C22  | 5313 (3)    | 4451.6 (16) | 2569 (2)    | 22.0 (6) |
| C23  | 5251 (3)    | 4968.8 (17) | 3401 (2)    | 26.0 (6) |
| C24  | 6108 (3)    | 5488.1 (18) | 3540 (3)    | 30.9 (7) |
| C25  | 7019 (3)    | 5508.0 (19) | 2846 (3)    | 32.5 (7) |
| C26  | 7076 (3)    | 4992.1 (18) | 2027 (3)    | 28.4 (6) |
| B1   | 4325 (3)    | 3625.6 (18) | 1330 (3)    | 22.0 (7) |
| O10A | 2558.2 (19) | 5091.5 (11) | 4921.1 (16) | 23.7 (4) |
| O11A | 1109.5 (18) | 5668.6 (11) | 5585.8 (17) | 23.9 (4) |
| O12A | 1360.9 (19) | 6864.1 (11) | 6390.9 (19) | 26.5 (5) |
| O20A | -2390 (2)   | 6355.9 (12) | 5450.1 (18) | 28.6 (5) |
| O21A | -485.1 (19) | 6446.5 (11) | 5745.1 (17) | 24.7 (4) |
| O22A | 560.7 (18)  | 5934.3 (11) | 7420.0 (17) | 24.2 (4) |
| C10A | 2216 (3)    | 5609.4 (15) | 5410 (2)    | 19.2 (6) |
| C11A | 2984 (3)    | 6207.9 (16) | 5807 (2)    | 18.8 (6) |
| C12A | 2500 (3)    | 6814.3 (15) | 6262 (2)    | 19.9 (6) |
| C13A | 3220 (3)    | 7394.4 (15) | 6574 (2)    | 22.0 (6) |
| C14A | 4392 (3)    | 7365.1 (17) | 6440 (2)    | 25.2 (7) |
| C15A | 4883 (3)    | 6754.2 (17) | 6003 (2)    | 24.1 (6) |
| C16A | 4171 (3)    | 6181.4 (16) | 5690 (2)    | 22.9 (6) |
| C20A | -1499 (3)   | 6189.2 (16) | 5994 (2)    | 23.0 (6) |
| C21A | -1461 (3)   | 5697.7 (15) | 6966 (2)    | 20.5 (6) |
| C22A | -425 (3)    | 5597.5 (16) | 7648 (2)    | 21.7 (6) |
| C23A | -412 (3)    | 5159.3 (16) | 8588 (2)    | 24.7 (6) |
| C24A | -1425 (3)   | 4825.8 (18) | 8840 (2)    | 28.8 (7) |
| C25A | -2465 (3)   | 4920.6 (18) | 8164 (3)    | 29.7 (7) |
| C26A | -2476 (3)   | 5355.8 (18) | 7236 (2)    | 26.2 (6) |
| B2   | 642 (3)     | 6230.8 (18) | 6304 (3)    | 22.9 (7) |

### Anisotropic Displacement Parameters ( $\text{\AA}^2 \times 10^3$ ) for compound 2. The Anisotropic

displacement factor exponent takes the form:  $-2\pi^2[h^2a^2U_{11}+2hka*b*U_{12}+...]$ .

| Atom | U <sub>11</sub> | U <sub>22</sub> | U <sub>33</sub> | U <sub>23</sub> | U <sub>13</sub> | U <sub>12</sub> |
|------|-----------------|-----------------|-----------------|-----------------|-----------------|-----------------|
| N1   | 28.4 (15)       | 19.4 (14)       | 24.3 (11)       | 2.3 (10)        | 4 (1)           | -2.1 (10)       |
| N16  | 24.5 (14)       | 19.0 (13)       | 25.0 (11)       | 1.9 (9)         | 3.6 (10)        | -0.5 (10)       |
| C31  | 40 (2)          | 27.0 (17)       | 25.7 (14)       | -0.3 (12)       | 9.2 (13)        | 2.2 (14)        |
| C32  | 43 (2)          | 30.0 (19)       | 32.3 (15)       | 6.6 (13)        | 16.3 (14)       | 4.8 (15)        |
| C33  | 34 (2)          | 35 (2)          | 41.7 (17)       | 12.0 (15)       | 12.5 (15)       | 2.1 (15)        |
| C34  | 26.2 (18)       | 28.7 (18)       | 39.5 (16)       | 3.8 (14)        | 5.3 (13)        | -2.4 (14)       |
| C35  | 25.9 (17)       | 26.3 (17)       | 28.3 (14)       | 5.1 (12)        | 2.2 (12)        | -1.8 (13)       |
| C36  | 28.9 (17)       | 22.7 (16)       | 25.0 (13)       | 8.2 (11)        | 3.2 (12)        | -0.8 (12)       |
| C37  | 25.8 (17)       | 19.2 (15)       | 31.0 (14)       | 2.4 (11)        | 1.6 (12)        | 1.1 (12)        |
| C38  | 29.2 (18)       | 23.5 (17)       | 36.9 (15)       | -1.4 (12)       | 2.9 (13)        | -4.5 (13)       |
| C39  | 26.7 (17)       | 27.1 (17)       | 28.3 (14)       | -3.7 (12)       | 0.7 (12)        | -1.7 (13)       |
| C40  | 28.1 (17)       | 30.2 (17)       | 22.0 (13)       | 2.6 (11)        | -0.3 (12)       | 3.7 (13)        |
| C41  | 28.4 (17)       | 27.1 (17)       | 28.5 (14)       | 7.7 (12)        | 8.6 (12)        | 1.7 (13)        |
| C42  | 29.9 (18)       | 21.5 (16)       | 36.7 (15)       | 0.6 (12)        | 10.5 (13)       | -3.7 (13)       |
| C43  | 26.9 (18)       | 24.6 (18)       | 34.8 (14)       | -0.5 (12)       | 4.0 (12)        | -2.5 (13)       |
| C44  | 29.2 (17)       | 20.9 (16)       | 32.0 (14)       | 4.1 (12)        | 0.0 (13)        | -1.3 (12)       |
| C45  | 28.6 (17)       | 17.8 (15)       | 24.8 (13)       | -0.3 (11)       | 2.9 (12)        | -0.3 (12)       |
| N1A  | 32.7 (16)       | 21.8 (14)       | 26.3 (11)       | -5.5 (10)       | 9.8 (11)        | -6.5 (11)       |
| N16A | 52.1 (19)       | 17.6 (14)       | 23.0 (11)       | -1.5 (9)        | 0.7 (12)        | -1.7 (13)       |
| C31A | 41 (2)          | 32.5 (19)       | 26.1 (14)       | -1.9 (13)       | 1.8 (13)        | -12.3 (15)      |
| C32A | 33 (2)          | 32.1 (19)       | 43.2 (17)       | -11.2 (14)      | 6.8 (15)        | -8.1 (15)       |
| C33A | 38 (2)          | 34 (2)          | 56 (2)          | -10.8 (16)      | 13.4 (17)       | -4.2 (17)       |
| C34A | 53 (3)          | 28.9 (19)       | 55 (2)          | -1.8 (16)       | 31.7 (19)       | -1.3 (17)       |
| C35A | 53 (2)          | 19.9 (16)       | 32.9 (15)       | -3.3 (12)       | 19.4 (15)       | 2.5 (14)        |
| C36A | 32.3 (19)       | 24.7 (18)       | 46.5 (17)       | -15.4 (14)      | 13.3 (15)       | -6.9 (14)       |
| C37A | 46 (2)          | 13.9 (16)       | 51.5 (19)       | -3.5 (13)       | 18.0 (17)       | -2.3 (14)       |
| C38A | 57 (3)          | 27 (2)          | 58 (2)          | 13.5 (16)       | 27 (2)          | 3.2 (18)        |
| C39A | 68 (3)          | 32 (2)          | 34.9 (16)       | 7.0 (14)        | 26.7 (18)       | 11.0 (18)       |
| C40A | 72 (3)          | 29.4 (19)       | 23.6 (14)       | -3.7 (12)       | 3.8 (16)        | 10.1 (18)       |
| C41A | 69 (3)          | 25.2 (19)       | 36.7 (17)       | -4.2 (14)       | -21.4 (18)      | -2.5 (18)       |
| C42A | 42 (2)          | 37 (2)          | 56 (2)          | 13.8 (17)       | -20.5 (18)      | -13.1 (17)      |
| C43A | 44 (2)          | 45 (2)          | 48 (2)          | 2.4 (17)        | -8.0 (17)       | -3.3 (18)       |
| C44A | 37 (2)          | 40 (2)          | 42.3 (18)       | -11.5 (15)      | 4.2 (16)        | -3.9 (16)       |
| C45A | 47 (2)          | 20.1 (18)       | 33.1 (15)       | -0.7 (12)       | 6.0 (15)        | 1.5 (15)        |
| O10  | 30.0 (12)       | 18.9 (11)       | 30.1 (10)       | 3.9 (8)         | -1.1 (9)        | 1.1 (9)         |
| O11  | 23.8 (11)       | 19.2 (11)       | 25.7 (9)        | 4.2 (8)         | 2.7 (8)         | -1.5 (8)        |
| O12  | 21.8 (12)       | 16.9 (11)       | 33 (1)          | 2.9 (8)         | 0.8 (8)         | 0.6 (8)         |
| O20  | 27.9 (13)       | 32.8 (14)       | 47.1 (12)       | -7.8 (10)       | 16.1 (11)       | -0.6 (10)       |
| O21  | 24.1 (12)       | 21.6 (11)       | 32.4 (10)       | -3.6 (8)        | 5.4 (9)         | -0.4 (9)        |
| O22  | 22.9 (11)       | 19.4 (10)       | 25.3 (9)        | 2.2 (7)         | 5.7 (8)         | 0.0 (8)         |

|      |           |           |           |           |           |           |
|------|-----------|-----------|-----------|-----------|-----------|-----------|
| C10  | 27.1 (16) | 15.9 (14) | 19.8 (12) | -3.2 (10) | 0.5 (11)  | -1.8 (11) |
| C11  | 29.9 (17) | 15.2 (15) | 19.4 (11) | -2.5 (10) | 3.1 (11)  | -3.1 (12) |
| C12  | 27.3 (17) | 16.2 (14) | 20.6 (12) | -1.2 (10) | 3.2 (11)  | -0.7 (12) |
| C13  | 34.1 (19) | 17.3 (15) | 26.7 (13) | 1.0 (11)  | 4.3 (12)  | -2.8 (13) |
| C14  | 32.5 (19) | 22.6 (16) | 28.5 (13) | -2.7 (12) | 8.0 (12)  | -9.1 (14) |
| C15  | 25.2 (18) | 30.8 (18) | 29.5 (14) | -7.5 (12) | 7.2 (12)  | -4.8 (13) |
| C16  | 27.3 (17) | 18.5 (15) | 25.4 (13) | -4.6 (11) | 0.3 (11)  | 2.2 (12)  |
| C20  | 22.0 (17) | 22.3 (17) | 32.7 (14) | 0.6 (12)  | 5.5 (12)  | 1.6 (12)  |
| C21  | 21.1 (16) | 22.5 (16) | 27.1 (13) | -0.1 (11) | 2.9 (11)  | 1.3 (12)  |
| C22  | 19.4 (15) | 20.6 (15) | 25.8 (13) | 3.2 (11)  | -0.1 (11) | 1.2 (12)  |
| C23  | 25.7 (16) | 26.4 (17) | 26.2 (13) | 0.3 (11)  | 4.9 (12)  | 1.1 (13)  |
| C24  | 31.3 (18) | 28.7 (18) | 32.3 (15) | -7.7 (12) | 0.0 (13)  | -0.8 (14) |
| C25  | 27.6 (17) | 29.2 (18) | 40.3 (16) | -4.0 (13) | 1.1 (13)  | -5.6 (14) |
| C26  | 22.6 (16) | 28.6 (17) | 34.8 (14) | -0.8 (12) | 7.0 (12)  | -3.2 (13) |
| B1   | 22.1 (18) | 16.9 (17) | 26.9 (15) | 1.5 (12)  | 1.8 (13)  | -0.5 (13) |
| O10A | 27.0 (12) | 17.7 (10) | 26.7 (9)  | -3.2 (8)  | 3.5 (8)   | 0.8 (8)   |
| O11A | 21.1 (11) | 17.1 (11) | 34 (1)    | -3.6 (8)  | 5.0 (8)   | -2.9 (8)  |
| O12A | 19.8 (12) | 15.3 (11) | 45.6 (12) | -4.3 (9)  | 8.9 (9)   | 0.3 (8)   |
| O20A | 19.8 (11) | 30.4 (13) | 34.9 (11) | 6.3 (9)   | -0.4 (9)  | 1.0 (9)   |
| O21A | 18.7 (11) | 21.7 (11) | 34 (1)    | 4.7 (8)   | 4.2 (9)   | -0.9 (8)  |
| O22A | 16.9 (10) | 23.5 (12) | 32 (1)    | -0.9 (8)  | 0.4 (8)   | -0.7 (8)  |
| C10A | 22.8 (15) | 15.8 (14) | 18.7 (12) | 2.3 (10)  | 0.2 (10)  | -0.1 (11) |
| C11A | 22.9 (15) | 16.8 (14) | 17.0 (11) | 1.5 (10)  | 3.6 (10)  | -1.5 (11) |
| C12A | 20.8 (16) | 15.7 (14) | 23.2 (12) | 1.4 (10)  | 1.9 (11)  | -0.4 (12) |
| C13A | 24.1 (16) | 15.6 (15) | 26.3 (13) | -1.3 (10) | 2.8 (12)  | 0.5 (11)  |
| C14A | 26.0 (17) | 20.3 (16) | 28.9 (14) | 0.5 (11)  | -0.3 (12) | -6.4 (12) |
| C15A | 16.6 (15) | 25.3 (16) | 30.8 (14) | 1.3 (12)  | 3.3 (11)  | -2.2 (12) |
| C16A | 26.0 (16) | 20.2 (16) | 23.0 (12) | -0.6 (11) | 4.2 (11)  | 3.0 (12)  |
| C20A | 22.5 (17) | 17.7 (15) | 28.9 (13) | -5.2 (11) | 3.1 (12)  | 0.8 (12)  |
| C21A | 20.6 (15) | 16.1 (14) | 24.9 (12) | -2.4 (10) | 1.9 (11)  | 1.3 (11)  |
| C22A | 22.6 (16) | 16.2 (14) | 26.9 (13) | -6.3 (10) | 4.8 (11)  | -0.5 (11) |
| C23A | 27.2 (17) | 23.5 (17) | 23.0 (13) | -3.4 (11) | -0.3 (12) | 5.6 (12)  |
| C24A | 33.8 (19) | 27.4 (17) | 25.9 (13) | 2.4 (11)  | 7.0 (12)  | 2.2 (14)  |
| C25A | 22.2 (17) | 34.0 (19) | 33.9 (15) | 1.4 (13)  | 8.7 (13)  | -6.0 (13) |
| C26A | 18.8 (15) | 28.2 (17) | 31.1 (15) | -0.9 (12) | -0.3 (12) | 0.3 (12)  |
| B2   | 18.4 (18) | 16.7 (17) | 34.3 (16) | -2.7 (13) | 6.3 (13)  | -2.9 (13) |



**Bond Lengths for compound 2.**

| Atom | Atom | Length/Å  | Atom | Atom | Length/Å  |
|------|------|-----------|------|------|-----------|
| N1   | C31  | 1.506 (4) | O12  | B1   | 1.445 (4) |
| N1   | C35  | 1.529 (4) | O20  | C20  | 1.216 (4) |
| N1   | C36  | 1.506 (4) | O21  | C20  | 1.332 (4) |
| N16  | C40  | 1.466 (4) | O21  | B1   | 1.464 (4) |
| N16  | C41  | 1.470 (4) | O22  | C22  | 1.347 (4) |
| N16  | C45  | 1.475 (4) | O22  | B1   | 1.463 (4) |
| C31  | C32  | 1.518 (5) | C10  | C11  | 1.479 (4) |
| C32  | C33  | 1.518 (5) | C11  | C12  | 1.406 (4) |
| C33  | C34  | 1.529 (5) | C11  | C16  | 1.395 (5) |
| C34  | C35  | 1.527 (4) | C12  | C13  | 1.398 (4) |
| C35  | C39  | 1.536 (4) | C13  | C14  | 1.383 (5) |
| C36  | C37  | 1.528 (4) | C14  | C15  | 1.390 (5) |
| C37  | C38  | 1.525 (4) | C15  | C16  | 1.382 (5) |
| C37  | C45  | 1.548 (4) | C20  | C21  | 1.480 (4) |
| C38  | C39  | 1.530 (5) | C21  | C22  | 1.400 (4) |
| C39  | C40  | 1.528 (4) | C21  | C26  | 1.399 (5) |
| C41  | C42  | 1.517 (5) | C22  | C23  | 1.398 (4) |
| C42  | C43  | 1.515 (5) | C23  | C24  | 1.390 (5) |
| C43  | C44  | 1.526 (4) | C24  | C25  | 1.398 (5) |
| C44  | C45  | 1.523 (4) | C25  | C26  | 1.385 (5) |
| N1A  | C31A | 1.502 (4) | O10A | C10A | 1.219 (4) |
| N1A  | C35A | 1.528 (4) | O11A | C10A | 1.318 (4) |
| N1A  | C36A | 1.503 (4) | O11A | B2   | 1.493 (4) |
| N16A | C40A | 1.463 (5) | O12A | C12A | 1.342 (4) |
| N16A | C41A | 1.466 (5) | O12A | B2   | 1.449 (4) |
| N16A | C45A | 1.480 (4) | O20A | C20A | 1.211 (4) |
| C31A | C32A | 1.515 (5) | O21A | C20A | 1.325 (4) |
| C32A | C33A | 1.530 (5) | O21A | B2   | 1.468 (4) |
| C33A | C34A | 1.511 (6) | O22A | C22A | 1.352 (4) |
| C34A | C35A | 1.529 (6) | O22A | B2   | 1.459 (4) |
| C35A | C39A | 1.535 (5) | C10A | C11A | 1.485 (4) |
| C36A | C37A | 1.527 (5) | C11A | C12A | 1.400 (4) |
| C37A | C38A | 1.521 (5) | C11A | C16A | 1.392 (4) |
| C37A | C45A | 1.533 (5) | C12A | C13A | 1.402 (4) |
| C38A | C39A | 1.527 (5) | C13A | C14A | 1.378 (5) |
| C39A | C40A | 1.518 (6) | C14A | C15A | 1.402 (4) |
| C41A | C42A | 1.509 (6) | C15A | C16A | 1.386 (4) |
| C42A | C43A | 1.518 (6) | C20A | C21A | 1.483 (4) |
| C43A | C44A | 1.530 (5) | C21A | C22A | 1.402 (4) |
| C44A | C45A | 1.520 (5) | C21A | C26A | 1.400 (4) |

|     |     |           |           |           |
|-----|-----|-----------|-----------|-----------|
| O10 | C10 | 1.233 (4) | C22A C23A | 1.394 (4) |
| O11 | C10 | 1.316 (4) | C23A C24A | 1.385 (5) |
| O11 | B1  | 1.503 (4) | C24A C25A | 1.401 (5) |
| O12 | C12 | 1.344 (4) | C25A C26A | 1.379 (5) |

**Bond Angles for compound 2.**

| Atom | Atom | Atom | Angle/°  | Atom | Atom | Atom | Angle/°  |
|------|------|------|----------|------|------|------|----------|
| C31  | N1   | C35  | 111.8(3) | C12  | C11  | C10  | 119.5(3) |
| C31  | N1   | C36  | 112.7(2) | C16  | C11  | C10  | 121.0(3) |
| C36  | N1   | C35  | 113.8(2) | C16  | C11  | C12  | 119.5(3) |
| C40  | N16  | C41  | 108.7(2) | O12  | C12  | C11  | 121.7(3) |
| C40  | N16  | C45  | 110.9(2) | O12  | C12  | C13  | 119.1(3) |
| C41  | N16  | C45  | 111.5(2) | C13  | C12  | C11  | 119.1(3) |
| N1   | C31  | C32  | 112.2(3) | C14  | C13  | C12  | 120.3(3) |
| C31  | C32  | C33  | 111.1(3) | C13  | C14  | C15  | 120.7(3) |
| C32  | C33  | C34  | 109.5(3) | C16  | C15  | C14  | 119.4(3) |
| C35  | C34  | C33  | 111.4(3) | C15  | C16  | C11  | 121.0(3) |
| N1   | C35  | C39  | 109.6(3) | O20  | C20  | O21  | 120.7(3) |
| C34  | C35  | N1   | 111.1(2) | O20  | C20  | C21  | 122.9(3) |
| C34  | C35  | C39  | 113.4(3) | O21  | C20  | C21  | 116.3(3) |
| N1   | C36  | C37  | 111.5(2) | C22  | C21  | C20  | 119.7(3) |
| C36  | C37  | C45  | 114.2(3) | C26  | C21  | C20  | 120.7(3) |
| C38  | C37  | C36  | 108.5(3) | C26  | C21  | C22  | 119.4(3) |
| C38  | C37  | C45  | 109.1(2) | O22  | C22  | C21  | 120.7(3) |
| C37  | C38  | C39  | 107.3(3) | O22  | C22  | C23  | 119.2(3) |
| C38  | C39  | C35  | 111.4(2) | C23  | C22  | C21  | 120.1(3) |
| C40  | C39  | C35  | 112.2(3) | C24  | C23  | C22  | 119.5(3) |
| C40  | C39  | C38  | 108.4(3) | C23  | C24  | C25  | 120.9(3) |
| N16  | C40  | C39  | 111.4(2) | C26  | C25  | C24  | 119.2(3) |
| N16  | C41  | C42  | 111.7(2) | C25  | C26  | C21  | 120.9(3) |
| C43  | C42  | C41  | 110.7(3) | O12  | B1   | O11  | 112.1(3) |
| C42  | C43  | C44  | 109.2(3) | O12  | B1   | O21  | 108.1(3) |
| C45  | C44  | C43  | 112.6(2) | O12  | B1   | O22  | 108.8(2) |
| N16  | C45  | C37  | 109.8(3) | O21  | B1   | O11  | 107.4(2) |
| N16  | C45  | C44  | 111.2(3) | O22  | B1   | O11  | 107.7(2) |
| C44  | C45  | C37  | 112.6(2) | O22  | B1   | O21  | 112.7(3) |
| C31A | N1A  | C35A | 111.3(3) | C10A | O11A | B2   | 123.8(2) |
| C36A | N1A  | C31A | 113.0(3) | C12A | O12A | B2   | 119.8(2) |
| C36A | N1A  | C35A | 113.0(2) | C20A | O21A | B2   | 124.3(2) |
| C40A | N16A | C41A | 109.7(3) | C22A | O22A | B2   | 119.1(2) |
| C40A | N16A | C45A | 111.3(3) | O10A | C10A | O11A | 120.3(3) |
| C41A | N16A | C45A | 111.2(3) | O10A | C10A | C11A | 123.2(3) |
| N1A  | C31A | C32A | 112.4(3) | O11A | C10A | C11A | 116.5(2) |
| C31A | C32A | C33A | 110.2(3) | C12A | C11A | C10A | 119.5(3) |
| C34A | C33A | C32A | 110.0(3) | C16A | C11A | C10A | 120.5(3) |
| C33A | C34A | C35A | 112.3(3) | C16A | C11A | C12A | 119.9(3) |
| N1A  | C35A | C34A | 111.1(3) | O12A | C12A | C11A | 122.1(3) |

|                |           |                |           |
|----------------|-----------|----------------|-----------|
| N1A C35A C39A  | 109.2 (3) | O12A C12A C13A | 118.7 (3) |
| C34A C35A C39A | 114.9 (3) | C11A C12A C13A | 119.2 (3) |
| N1A C36A C37A  | 111.2 (3) | C14A C13A C12A | 120.3 (3) |
| C36A C37A C45A | 114.4 (3) | C13A C14A C15A | 120.7 (3) |
| C38A C37A C36A | 108.8 (3) | C16A C15A C14A | 119.1 (3) |
| C38A C37A C45A | 109.4 (3) | C15A C16A C11A | 120.8 (3) |
| C37A C38A C39A | 107.2 (3) | O20A C20A O21A | 120.8 (3) |
| C38A C39A C35A | 111.2 (3) | O20A C20A C21A | 123.2 (3) |
| C40A C39A C35A | 113.1 (3) | O21A C20A C21A | 116.0 (3) |
| C40A C39A C38A | 107.9 (4) | C22A C21A C20A | 120.4 (3) |
| N16A C40A C39A | 112.0 (3) | C26A C21A C20A | 120.0 (3) |
| N16A C41A C42A | 112.1 (3) | C26A C21A C22A | 119.5 (3) |
| C41A C42A C43A | 110.8 (3) | O22A C22A C21A | 120.7 (3) |
| C42A C43A C44A | 108.7 (3) | O22A C22A C23A | 119.3 (3) |
| C45A C44A C43A | 111.6 (3) | C23A C22A C21A | 119.9 (3) |
| N16A C45A C37A | 109.6 (3) | C24A C23A C22A | 119.6 (3) |
| N16A C45A C44A | 110.6 (3) | C23A C24A C25A | 121.0 (3) |
| C44A C45A C37A | 112.1 (3) | C26A C25A C24A | 119.2 (3) |
| C10 O11 B1     | 120.2 (2) | C25A C26A C21A | 120.7 (3) |
| C12 O12 B1     | 116.7 (2) | O12A B2 O11A   | 112.8 (3) |
| C20 O21 B1     | 120.2 (2) | O12A B2 O21A   | 106.6 (3) |
| C22 O22 B1     | 114.9 (2) | O12A B2 O22A   | 109.3 (3) |
| O10 C10 O11    | 121.0 (3) | O21A B2 O11A   | 106.5 (2) |
| O10 C10 C11    | 122.3 (3) | O22A B2 O11A   | 108.3 (3) |
| O11 C10 C11    | 116.6 (3) | O22A B2 O21A   | 113.4 (3) |

**Hydrogen Bonds for compound 2.**

| <b>D</b> | <b>H</b> | <b>A</b> | <b>d(D-H)/Å</b> | <b>d(H-A)/Å</b> | <b>d(D-A)/Å</b> | <b>D-H-A/°</b> |
|----------|----------|----------|-----------------|-----------------|-----------------|----------------|
| N1       | H1       | N16      | 1.01 (5)        | 2.01 (5)        | 2.754 (3)       | 128 (4)        |
| N1A      | H1A      | N16A     | 0.96 (4)        | 2.07 (4)        | 2.754 (4)       | 127 (3)        |

**Torsion Angles for compound 2.**

| <b>A</b> | <b>B</b> | <b>C</b> | <b>D</b> | <b>Angle/°</b> | <b>A</b> | <b>B</b> | <b>C</b> | <b>D</b> | <b>Angle/°</b> |
|----------|----------|----------|----------|----------------|----------|----------|----------|----------|----------------|
| N1       | C31      | C32      | C33      | 56.3 (4)       | O21      | C20      | C21      | C26      | -171.8 (3)     |
| N1       | C35      | C39      | C38      | -55.1 (3)      | O22      | C22      | C23      | C24      | 179.3 (3)      |
| N1       | C35      | C39      | C40      | 66.8 (3)       | C10      | O11      | B1       | O12      | 40.4 (4)       |
| N1       | C36      | C37      | C38      | 59.4 (3)       | C10      | O11      | B1       | O21      | 159.0 (2)      |
| N1       | C36      | C37      | C45      | -62.5 (3)      | C10      | O11      | B1       | O22      | -79.3 (3)      |
| N16      | C41      | C42      | C43      | -58.1 (3)      | C10      | C11      | C12      | O12      | -2.7 (4)       |
| C31      | N1       | C35      | C34      | 52.6 (3)       | C10      | C11      | C12      | C13      | 178.9 (2)      |
| C31      | N1       | C35      | C39      | 178.7 (2)      | C10      | C11      | C16      | C15      | -179.0 (2)     |
| C31      | N1       | C36      | C37      | 178.5 (3)      | C11      | C12      | C13      | C14      | 0.2 (4)        |
| C31      | C32      | C33      | C34      | -57.6 (4)      | C12      | O12      | B1       | O11      | -39.6 (3)      |
| C32      | C33      | C34      | C35      | 57.6 (4)       | C12      | O12      | B1       | O21      | -157.8 (2)     |
| C33      | C34      | C35      | N1       | -55.2 (4)      | C12      | O12      | B1       | O22      | 79.5 (3)       |
| C33      | C34      | C35      | C39      | -179.1 (3)     | C12      | C11      | C16      | C15      | 1.1 (4)        |
| C34      | C35      | C39      | C38      | 69.7 (3)       | C12      | C13      | C14      | C15      | 1.0 (4)        |
| C34      | C35      | C39      | C40      | -168.5 (3)     | C13      | C14      | C15      | C16      | -1.1 (4)       |
| C35      | N1       | C31      | C32      | -53.4 (3)      | C14      | C15      | C16      | C11      | 0.1 (4)        |
| C35      | N1       | C36      | C37      | -52.8 (3)      | C16      | C11      | C12      | O12      | 177.2 (2)      |
| C35      | C39      | C40      | N16      | -63.2 (3)      | C16      | C11      | C12      | C13      | -1.2 (4)       |
| C36      | N1       | C31      | C32      | 76.4 (3)       | C20      | O21      | B1       | O11      | 80.5 (3)       |
| C36      | N1       | C35      | C34      | -76.6 (3)      | C20      | O21      | B1       | O12      | -158.4 (2)     |
| C36      | N1       | C35      | C39      | 49.5 (3)       | C20      | O21      | B1       | O22      | -38.1 (4)      |
| C36      | C37      | C38      | C39      | -63.8 (3)      | C20      | C21      | C22      | O22      | -4.0 (4)       |
| C36      | C37      | C45      | N16      | 61.6 (3)       | C20      | C21      | C22      | C23      | 175.4 (3)      |
| C36      | C37      | C45      | C44      | -62.9 (4)      | C20      | C21      | C26      | C25      | -175.5 (3)     |
| C37      | C38      | C39      | C35      | 63.2 (3)       | C21      | C22      | C23      | C24      | -0.1 (5)       |
| C37      | C38      | C39      | C40      | -60.8 (3)      | C22      | O22      | B1       | O11      | -73.3 (3)      |
| C38      | C37      | C45      | N16      | -60.0 (3)      | C22      | O22      | B1       | O12      | 164.9 (2)      |
| C38      | C37      | C45      | C44      | 175.5 (3)      | C22      | O22      | B1       | O21      | 45.0 (3)       |
| C38      | C39      | C40      | N16      | 60.3 (3)       | C22      | C21      | C26      | C25      | 0.5 (5)        |
| C40      | N16      | C41      | C42      | -179.4 (3)     | C22      | C23      | C24      | C25      | 1.2 (5)        |
| C40      | N16      | C45      | C37      | 58.1 (3)       | C23      | C24      | C25      | C26      | -1.4 (5)       |
| C40      | N16      | C45      | C44      | -176.6 (2)     | C24      | C25      | C26      | C21      | 0.5 (5)        |
| C41      | N16      | C40      | C39      | 178.0 (3)      | C26      | C21      | C22      | O22      | 179.9 (3)      |
| C41      | N16      | C45      | C37      | 179.4 (2)      | C26      | C21      | C22      | C23      | -0.7 (4)       |
| C41      | N16      | C45      | C44      | -55.3 (3)      | B1       | O11      | C10      | O10      | 160.9 (2)      |
| C41      | C42      | C43      | C44      | 54.7 (3)       | B1       | O11      | C10      | C11      | -21.4 (4)      |
| C42      | C43      | C44      | C45      | -53.4 (3)      | B1       | O12      | C12      | C11      | 23.0 (4)       |
| C43      | C44      | C45      | N16      | 53.9 (3)       | B1       | O12      | C12      | C13      | -158.6 (3)     |
| C43      | C44      | C45      | C37      | 177.6 (3)      | B1       | O21      | C20      | O20      | -172.3 (3)     |
| C45      | N16      | C40      | C39      | -59.1 (3)      | B1       | O21      | C20      | C21      | 9.9 (4)        |

|                     |            |                     |            |
|---------------------|------------|---------------------|------------|
| C45 N16 C41 C42     | 58.0 (3)   | B1 O22 C22 C21      | -25.1 (4)  |
| C45 C37 C38 C39     | 61.1 (3)   | B1 O22 C22 C23      | 155.6 (3)  |
| N1A C31A C32A C33A  | 57.3 (4)   | O10A C10A C11A C12A | 173.7 (3)  |
| N1A C35A C39A C38A  | -56.6 (4)  | O10A C10A C11A C16A | -3.8 (4)   |
| N1A C35A C39A C40A  | 65.0 (4)   | O11A C10A C11A C12A | -4.6 (3)   |
| N1A C36A C37A C38A  | 59.7 (4)   | O11A C10A C11A C16A | 177.9 (2)  |
| N1A C36A C37A C45A  | -63.0 (4)  | O12A C12A C13A C14A | -179.2 (3) |
| N16A C41A C42A C43A | -57.5 (4)  | O20A C20A C21A C22A | -171.7 (3) |
| C31A N1A C35A C34A  | 52.3 (4)   | O20A C20A C21A C26A | 5.3 (4)    |
| C31A N1A C35A C39A  | -179.9 (3) | O21A C20A C21A C22A | 8.0 (4)    |
| C31A N1A C36A C37A  | 178.3 (3)  | O21A C20A C21A C26A | -175.0 (3) |
| C31A C32A C33A C34A | -57.1 (4)  | O22A C22A C23A C24A | 178.5 (3)  |
| C32A C33A C34A C35A | 56.4 (4)   | C10A O11A B2 O12A   | 25.2 (4)   |
| C33A C34A C35A N1A  | -54.1 (4)  | C10A O11A B2 O21A   | 141.8 (2)  |
| C33A C34A C35A C39A | -178.7 (3) | C10A O11A B2 O22A   | -95.9 (3)  |
| C34A C35A C39A C38A | 69.0 (4)   | C10A C11A C12A O12A | 2.5 (4)    |
| C34A C35A C39A C40A | -169.4 (3) | C10A C11A C12A C13A | -176.3 (2) |
| C35A N1A C31A C32A  | -54.9 (4)  | C10A C11A C16A C15A | 176.5 (2)  |
| C35A N1A C36A C37A  | -54.2 (4)  | C11A C12A C13A C14A | -0.4 (4)   |
| C35A C39A C40A N16A | -63.5 (4)  | C12A O12A B2 O11A   | -26.4 (4)  |
| C36A N1A C31A C32A  | 73.5 (4)   | C12A O12A B2 O21A   | -143.0 (2) |
| C36A N1A C35A C34A  | -76.1 (4)  | C12A O12A B2 O22A   | 94.1 (3)   |
| C36A N1A C35A C39A  | 51.7 (4)   | C12A C11A C16A C15A | -1.1 (4)   |
| C36A C37A C38A C39A | -63.2 (4)  | C12A C13A C14A C15A | -0.7 (4)   |
| C36A C37A C45A N16A | 62.5 (3)   | C13A C14A C15A C16A | 1.0 (4)    |
| C36A C37A C45A C44A | -60.8 (4)  | C14A C15A C16A C11A | -0.1 (4)   |
| C37A C38A C39A C35A | 63.2 (5)   | C16A C11A C12A O12A | -179.9 (3) |
| C37A C38A C39A C40A | -61.3 (4)  | C16A C11A C12A C13A | 1.3 (4)    |
| C38A C37A C45A N16A | -59.8 (4)  | C20A O21A B2 O11A   | 96.1 (3)   |
| C38A C37A C45A C44A | 176.9 (3)  | C20A O21A B2 O12A   | -143.2 (3) |
| C38A C39A C40A N16A | 60.0 (4)   | C20A O21A B2 O22A   | -22.9 (4)  |
| C40A N16A C41A C42A | -178.7 (3) | C20A C21A C22A O22A | -1.4 (4)   |
| C40A N16A C45A C37A | 56.6 (3)   | C20A C21A C22A C23A | 177.1 (3)  |
| C40A N16A C45A C44A | -179.3 (3) | C20A C21A C26A C25A | -177.3 (3) |
| C41A N16A C40A C39A | 178.7 (3)  | C21A C22A C23A C24A | 0.0 (4)    |
| C41A N16A C45A C37A | 179.2 (3)  | C22A O22A B2 O11A   | -89.1 (3)  |
| C41A N16A C45A C44A | -56.6 (4)  | C22A O22A B2 O12A   | 147.7 (2)  |
| C41A C42A C43A C44A | 55.1 (4)   | C22A O22A B2 O21A   | 28.9 (4)   |
| C42A C43A C44A C45A | -55.4 (4)  | C22A C21A C26A C25A | -0.2 (4)   |
| C43A C44A C45A N16A | 56.5 (4)   | C22A C23A C24A C25A | 0.1 (5)    |
| C43A C44A C45A C37A | 179.2 (3)  | C23A C24A C25A C26A | -0.3 (5)   |
| C45A N16A C40A C39A | -57.8 (4)  | C24A C25A C26A C21A | 0.3 (5)    |

|                     |            |                     |            |
|---------------------|------------|---------------------|------------|
| C45A N16A C41A C42A | 57.7 (4)   | C26A C21A C22A O22A | -178.5 (3) |
| C45A C37A C38A C39A | 62.4 (4)   | C26A C21A C22A C23A | 0.1 (4)    |
| O10 C10 C11 C12     | 179.5 (3)  | B2 O11A C10A O10A   | 171.6 (3)  |
| O10 C10 C11 C16     | -0.4 (4)   | B2 O11A C10A C11A   | -10.1 (4)  |
| O11 C10 C11 C12     | 1.9 (4)    | B2 O12A C12A C11A   | 14.3 (4)   |
| O11 C10 C11 C16     | -178.0 (2) | B2 O12A C12A C13A   | -167.0 (3) |
| O12 C12 C13 C14     | -178.3 (3) | B2 O21A C20A O20A   | -175.1 (3) |
| O20 C20 C21 C22     | -165.5 (3) | B2 O21A C20A C21A   | 5.2 (4)    |
| O20 C20 C21 C26     | 10.5 (5)   | B2 O22A C22A C21A   | -17.9 (4)  |
| O21 C20 C21 C22     | 12.2 (4)   | B2 O22A C22A C23A   | 163.5 (3)  |



**Hydrogen Atom Coordinates ( $\text{\AA}\times 10^4$ ) and Isotropic Displacement Parameters ( $\text{\AA}^2\times 10^3$ ) for compound 2.**

| <b>Atom</b> | <b>x</b>  | <b>y</b>  | <b>z</b>  | <b>U(eq)</b> |
|-------------|-----------|-----------|-----------|--------------|
| H1          | 2840 (40) | 5940 (30) | 540 (40)  | 53 (13)      |
| H31A        | 3269      | 5749      | -1381     | 37           |
| H31B        | 4110      | 5316      | -489      | 37           |
| H32A        | 4711      | 6609      | -1566     | 41           |
| H32B        | 5233      | 5839      | -1804     | 41           |
| H33A        | 6571      | 6507      | -600      | 44           |
| H33B        | 6180      | 5802      | 24        | 44           |
| H34A        | 6077      | 6791      | 1241      | 38           |
| H34B        | 5233      | 7199      | 321       | 38           |
| H35         | 4660      | 5917      | 1445      | 32           |
| H36A        | 2109      | 6721      | -778      | 31           |
| H36B        | 3273      | 7188      | -640      | 31           |
| H37         | 1891      | 7715      | 415       | 30           |
| H38A        | 3040      | 7800      | 2147      | 36           |
| H38B        | 3873      | 7791      | 1141      | 36           |
| H39         | 4555      | 6971      | 2576      | 33           |
| H40A        | 3388      | 5978      | 2970      | 32           |
| H40B        | 2762      | 6708      | 3256      | 32           |
| H41A        | 964       | 6083      | 3147      | 33           |
| H41B        | 1619      | 5368      | 2837      | 33           |
| H42A        | 371       | 5244      | 1182      | 35           |
| H42B        | -385      | 5288      | 2239      | 35           |
| H43A        | -824      | 6487      | 1861      | 34           |
| H43B        | -1164     | 6037      | 741       | 34           |
| H44A        | 547       | 6379      | -18       | 33           |
| H44B        | -75       | 7088      | 367       | 33           |
| H45         | 1186      | 7156      | 1995      | 28           |
| H1A         | 1630 (40) | 4060 (20) | 5340 (30) | 36 (10)      |
| H31C        | 817       | 4012      | 3468      | 40           |
| H31D        | 341       | 4666      | 4151      | 40           |
| H32C        | -884      | 3360      | 3691      | 43           |
| H32D        | -1225     | 4111      | 3118      | 43           |
| H33C        | -1681     | 4579      | 4863      | 51           |
| H33D        | -2424     | 3867      | 4603      | 51           |
| H34C        | -1114     | 3205      | 5784      | 53           |
| H34D        | -1562     | 3865      | 6473      | 53           |
| H35A        | 145       | 4498      | 6251      | 41           |
| H36C        | 1755      | 3009      | 4456      | 41           |
| H36D        | 516       | 2778      | 4841      | 41           |

|      |       |      |      |    |
|------|-------|------|------|----|
| H37A | 1970  | 2255 | 6053 | 44 |
| H38C | 1333  | 2642 | 7776 | 55 |
| H38D | 246   | 2600 | 6843 | 55 |
| H39A | 241   | 3704 | 7825 | 52 |
| H40C | 1793  | 4512 | 7691 | 50 |
| H40D | 2233  | 3791 | 8302 | 50 |
| H41C | 4166  | 4058 | 7861 | 54 |
| H41D | 3692  | 4774 | 7256 | 54 |
| H42C | 5482  | 4436 | 6604 | 56 |
| H42D | 4475  | 4435 | 5595 | 56 |
| H43C | 5372  | 3190 | 6761 | 55 |
| H43D | 5555  | 3383 | 5484 | 55 |
| H44C | 3553  | 3246 | 4960 | 48 |
| H44D | 4015  | 2533 | 5584 | 48 |
| H45A | 3286  | 2912 | 7256 | 40 |
| H13  | 2254  | 2084 | 2134 | 31 |
| H14  | 248   | 2176 | 2147 | 33 |
| H15  | -735  | 3179 | 1393 | 34 |
| H16  | 312   | 4108 | 676  | 29 |
| H23  | 4627  | 4965 | 3868 | 31 |
| H24  | 6074  | 5835 | 4114 | 37 |
| H25  | 7593  | 5871 | 2936 | 39 |
| H26  | 7697  | 5000 | 1557 | 34 |
| H13A | 2900  | 7809 | 6879 | 26 |
| H14A | 4871  | 7763 | 6645 | 30 |
| H15A | 5693  | 6733 | 5923 | 29 |
| H16A | 4498  | 5766 | 5393 | 28 |
| H23A | 288   | 5090 | 9052 | 30 |
| H24A | -1415 | 4528 | 9482 | 35 |
| H25A | -3155 | 4688 | 8342 | 36 |
| H26A | -3179 | 5424 | 6776 | 31 |

**Table 3 Crystal data and structure refinement for compound 2-RT.**

|                                             |                                                                |
|---------------------------------------------|----------------------------------------------------------------|
| Identification code                         | lawr13CuRT3                                                    |
| Empirical formula                           | C <sub>29</sub> H <sub>35</sub> BN <sub>2</sub> O <sub>6</sub> |
| Formula weight                              | 518.40                                                         |
| Temperature/K                               | 281(12)                                                        |
| Crystal system                              | orthorhombic                                                   |
| Space group                                 | P2 <sub>1</sub> 2 <sub>1</sub> 2 <sub>1</sub>                  |
| a/Å                                         | 11.70439(17)                                                   |
| b/Å                                         | 11.96490(18)                                                   |
| c/Å                                         | 18.9233(2)                                                     |
| α/°                                         | 90                                                             |
| β/°                                         | 90                                                             |
| γ/°                                         | 90                                                             |
| Volume/Å <sup>3</sup>                       | 2650.06(6)                                                     |
| Z                                           | 4                                                              |
| ρ <sub>calc</sub> /g/cm <sup>3</sup>        | 1.299                                                          |
| μ/mm <sup>-1</sup>                          | 0.731                                                          |
| F(000)                                      | 1104.0                                                         |
| Crystal size/mm <sup>3</sup>                | 0.1 × 0.1 × 0.1                                                |
| Radiation                                   | CuKα (λ = 1.54184)                                             |
| 2θ range for data collection/°              | 8.744 to 134.972                                               |
| Index ranges                                | -14 ≤ h ≤ 10, -13 ≤ k ≤ 14, -22 ≤ l ≤ 19                       |
| Reflections collected                       | 14561                                                          |
| Independent reflections                     | 4763 [R <sub>int</sub> = 0.0157, R <sub>sigma</sub> = 0.0151]  |
| Data/restraints/parameters                  | 4763/213/482                                                   |
| Completeness to theta = 66.5°               | 99.8%                                                          |
| Goodness-of-fit on F <sup>2</sup>           | 1.014                                                          |
| Final R indexes [I ≥ 2σ (I)]                | R <sub>1</sub> = 0.0285, wR <sub>2</sub> = 0.0751              |
| Final R indexes [all data]                  | R <sub>1</sub> = 0.0310, wR <sub>2</sub> = 0.0770              |
| Largest diff. peak/hole / e Å <sup>-3</sup> | 0.11/-0.10                                                     |
| Flack parameter                             | 0.00(6)                                                        |

**Fractional Atomic Coordinates ( $\times 10^4$ ) and Equivalent Isotropic Displacement Parameters ( $\text{\AA}^2 \times 10^3$ ) for compound 2-RT.  $U_{eq}$  is defined as 1/3 of of the trace of the orthogonalised  $U_{ij}$  tensor.**

| Atom | <i>x</i>    | <i>y</i>    | <i>z</i>    | $U(eq)$   |
|------|-------------|-------------|-------------|-----------|
| B1   | 3055.9 (18) | 6384 (2)    | 1216.6 (11) | 54.6 (4)  |
| O10  | 5061.6 (13) | 5047.7 (13) | 2352.4 (6)  | 64.3 (3)  |
| O11  | 3558.0 (11) | 5631.2 (12) | 1761.3 (6)  | 58.5 (3)  |
| O12  | 3725.4 (12) | 6435.7 (14) | 578.7 (7)   | 64.7 (4)  |
| O20  | 114.6 (14)  | 5691.6 (17) | 1262.7 (9)  | 84.7 (5)  |
| O21  | 1939.4 (12) | 5924.3 (13) | 1027.9 (7)  | 63.1 (3)  |
| O22  | 2973.0 (11) | 7503.8 (11) | 1515.9 (7)  | 56.9 (3)  |
| C10  | 4669.8 (15) | 5504.2 (14) | 1831.6 (8)  | 49.0 (4)  |
| C11  | 5380.1 (15) | 5907.5 (14) | 1237.7 (8)  | 47.8 (4)  |
| C12  | 4865.3 (16) | 6361.8 (15) | 640.1 (8)   | 50.2 (4)  |
| C13  | 5546.3 (19) | 6726.1 (18) | 82.2 (10)   | 61.3 (5)  |
| C14  | 6713 (2)    | 6632.4 (19) | 121.4 (11)  | 68.3 (5)  |
| C15  | 7231.6 (18) | 6173 (2)    | 711.5 (12)  | 69.5 (5)  |
| C16  | 6563.3 (17) | 5819.2 (18) | 1266.1 (11) | 60.4 (4)  |
| C20  | 1007.3 (16) | 6156.1 (17) | 1393.8 (10) | 57.7 (4)  |
| C21  | 1119.3 (15) | 7025.6 (16) | 1940.5 (10) | 55.4 (4)  |
| C22  | 2103.0 (15) | 7690.2 (15) | 1963.6 (10) | 52.0 (4)  |
| C23  | 2177 (2)    | 8565.1 (19) | 2444.3 (12) | 67.8 (5)  |
| C24  | 1283 (2)    | 8759 (2)    | 2901.5 (15) | 85.7 (7)  |
| C25  | 321 (2)     | 8096 (3)    | 2891.5 (17) | 93.4 (8)  |
| C26  | 237.1 (19)  | 7236 (2)    | 2412.4 (13) | 75.1 (6)  |
| N1   | 3575.5 (18) | 5181.9 (15) | 3705.0 (9)  | 65.6 (4)  |
| N16  | 5246.1 (18) | 6852.4 (15) | 3707.0 (9)  | 69.1 (5)  |
| C31  | 2986 (18)   | 4248 (16)   | 3278 (9)    | 116 (6)   |
| C31A | 3065 (11)   | 4219 (8)    | 3334 (5)    | 65 (2)    |
| C32  | 1843 (14)   | 3940 (14)   | 3656 (10)   | 78 (3)    |
| C32A | 1996 (19)   | 3767 (18)   | 3612 (14)   | 106 (6)   |
| C33  | 1028 (12)   | 4743 (12)   | 3550 (6)    | 96 (3)    |
| C33A | 1163 (12)   | 4890 (12)   | 3796 (6)    | 91 (3)    |
| C34  | 1503 (10)   | 5703 (12)   | 3978 (6)    | 97 (3)    |
| C34A | 1743 (10)   | 5798 (10)   | 4234 (5)    | 87 (2)    |
| C35  | 2836 (13)   | 6185 (13)   | 3892 (7)    | 72 (2)    |
| C35A | 2684 (13)   | 6116 (13)   | 3715 (7)    | 76 (3)    |
| C36  | 4316 (11)   | 4804 (12)   | 4382 (7)    | 71 (2)    |
| C36A | 3978 (11)   | 4819 (15)   | 4359 (9)    | 78 (3)    |
| C37  | 4892 (8)    | 5730 (8)    | 4745 (6)    | 69.1 (19) |
| C37A | 4487 (9)    | 5836 (11)   | 4772 (6)    | 86 (3)    |
| C38  | 3993 (8)    | 6527 (9)    | 5006 (5)    | 83 (2)    |

|      |           |           |           |           |
|------|-----------|-----------|-----------|-----------|
| C38A | 3618 (10) | 6714 (10) | 4869 (6)  | 100 (3)   |
| C39  | 3446 (10) | 7056 (10) | 4355 (5)  | 75 (2)    |
| C39A | 3241 (12) | 7090 (12) | 4125 (6)  | 94 (3)    |
| C40  | 4349 (13) | 7680 (13) | 3951 (5)  | 72 (2)    |
| C40A | 4294 (15) | 7585 (14) | 3732 (6)  | 91 (3)    |
| C41  | 6095 (14) | 7549 (13) | 3364 (9)  | 83 (3)    |
| C41A | 6212 (13) | 7351 (13) | 3279 (11) | 98 (4)    |
| C42  | 7089 (10) | 6821 (10) | 3062 (6)  | 76.4 (19) |
| C42A | 7176 (13) | 6545 (13) | 3259 (7)  | 109 (4)   |
| C43  | 7683 (8)  | 6250 (8)  | 3670 (5)  | 74.5 (17) |
| C43A | 7496 (11) | 6025 (11) | 3925 (6)  | 107 (3)   |
| C44  | 6790 (9)  | 5608 (9)  | 4100 (5)  | 75 (2)    |
| C44A | 6474 (10) | 5501 (14) | 4283 (7)  | 105 (3)   |
| C45  | 5809 (9)  | 6365 (12) | 4326 (8)  | 62 (2)    |
| C45A | 5514 (11) | 6315 (15) | 4394 (9)  | 79 (3)    |

**Anisotropic Displacement Parameters ( $\text{\AA}^2 \times 10^3$ ) for compound 2-RT. The Anisotropic displacement factor exponent takes the form:  $-\pi^2[h^2a^{*2}U_{11}+2hka^*b^*U_{12}+\dots]$ .**

| Atom | $U_{11}$  | $U_{22}$   | $U_{33}$  | $U_{23}$   | $U_{13}$  | $U_{12}$   |
|------|-----------|------------|-----------|------------|-----------|------------|
| B1   | 52.7 (10) | 67.7 (12)  | 43.2 (9)  | 4.9 (9)    | -0.7 (8)  | 0.1 (9)    |
| O10  | 70.0 (8)  | 76.8 (8)   | 46.1 (6)  | 15.9 (6)   | -2.8 (6)  | 2.6 (7)    |
| O11  | 56.5 (7)  | 71.4 (8)   | 47.7 (7)  | 14.0 (6)   | 5.3 (5)   | 3.0 (6)    |
| O12  | 59.9 (8)  | 94.2 (10)  | 40.0 (6)  | 11.9 (6)   | 0.6 (5)   | 6.9 (7)    |
| O20  | 64.4 (9)  | 108.9 (12) | 80.7 (10) | -11.9 (9)  | -3.8 (8)  | -29.0 (9)  |
| O21  | 58.8 (7)  | 77.7 (9)   | 52.8 (7)  | -6.9 (6)   | -3.8 (6)  | -5.6 (6)   |
| O22  | 50.6 (6)  | 64.1 (7)   | 56.1 (7)  | 4.7 (5)    | 1.8 (5)   | -5.3 (5)   |
| C10  | 57.8 (9)  | 49.1 (8)   | 40.0 (8)  | 0.1 (6)    | 0.1 (7)   | 0.7 (7)    |
| C11  | 56.3 (9)  | 48.3 (8)   | 38.9 (7)  | -3.3 (7)   | 2.6 (7)   | -1.0 (7)   |
| C12  | 58.7 (10) | 53.3 (9)   | 38.6 (7)  | -2.6 (7)   | 2.8 (7)   | 0.4 (7)    |
| C13  | 73.8 (12) | 68.1 (11)  | 42.0 (9)  | 4.6 (8)    | 7.7 (8)   | -1.7 (9)   |
| C14  | 76.6 (13) | 73.5 (12)  | 54.9 (10) | -0.9 (9)   | 20.7 (10) | -10.9 (10) |
| C15  | 54.8 (11) | 84.7 (14)  | 68.9 (12) | -4.7 (11)  | 9.3 (9)   | -3.5 (10)  |
| C16  | 58.8 (10) | 69.2 (11)  | 53.3 (9)  | -2.1 (9)   | -1.0 (8)  | 2.9 (8)    |
| C20  | 54.3 (10) | 66.6 (11)  | 52.3 (9)  | 6.1 (8)    | -5.9 (8)  | -7.0 (8)   |
| C21  | 48.3 (9)  | 61 (1)     | 57 (1)    | 5.0 (8)    | -3.5 (8)  | 0.3 (8)    |
| C22  | 50.4 (9)  | 54.7 (9)   | 50.9 (9)  | 8.5 (7)    | -4.1 (8)  | 2.6 (7)    |
| C23  | 65.6 (12) | 61.1 (11)  | 76.7 (13) | -5 (1)     | -1.6 (10) | -2.9 (9)   |
| C24  | 82.7 (16) | 80.6 (15)  | 93.8 (17) | -27.9 (13) | 9.2 (13)  | 3.7 (13)   |
| C25  | 73.0 (15) | 107.3 (19) | 100 (2)   | -24.1 (16) | 25.7 (14) | 7.8 (14)   |
| C26  | 54.5 (12) | 85.6 (14)  | 85.1 (15) | -6.1 (12)  | 10.8 (11) | -3.8 (10)  |
| N1   | 87.0 (11) | 63.7 (9)   | 46.1 (8)  | 12.2 (7)   | 17.6 (8)  | 6.8 (9)    |
| N16  | 86.0 (12) | 65.3 (10)  | 55.9 (9)  | 5.0 (8)    | -2.8 (9)  | 6.8 (9)    |
| C31  | 112 (10)  | 124 (11)   | 111 (9)   | -24 (7)    | -4 (7)    | -28 (8)    |
| C31A | 86 (6)    | 61 (4)     | 46 (3)    | 12 (3)     | 27 (3)    | -3 (4)     |
| C32  | 77 (5)    | 78 (6)     | 79 (5)    | 20 (4)     | 23 (4)    | -13 (5)    |
| C32A | 114 (10)  | 87 (6)     | 117 (9)   | 23 (5)     | 29 (7)    | 14 (5)     |
| C33  | 82 (4)    | 105 (6)    | 100 (7)   | 25 (5)     | 5 (5)     | 6 (4)      |
| C33A | 86 (5)    | 98 (5)     | 88 (7)    | 19 (5)     | 18 (4)    | -25 (4)    |
| C34  | 86 (5)    | 102 (5)    | 103 (8)   | 9 (5)      | 16 (4)    | 25 (4)     |
| C34A | 90 (5)    | 87 (4)     | 85 (5)    | 10 (4)     | 27 (4)    | 3 (3)      |
| C35  | 86 (4)    | 66 (4)     | 64 (5)    | 20 (3)     | 10 (3)    | 5 (3)      |
| C35A | 86 (4)    | 67 (4)     | 75 (6)    | 10 (4)     | 6 (4)     | 24 (3)     |
| C36  | 97 (6)    | 65 (3)     | 50 (3)    | 22 (2)     | 3 (4)     | 15 (4)     |
| C36A | 86 (6)    | 78 (4)     | 71 (4)    | 22 (3)     | -11 (4)   | 16 (4)     |
| C37  | 97 (5)    | 71 (3)     | 40 (3)    | 7 (2)      | 7 (3)     | 26 (3)     |
| C37A | 104 (6)   | 111 (6)    | 44 (3)    | 6 (3)      | 2 (4)     | 28 (4)     |
| C38  | 103 (5)   | 93 (4)     | 53 (3)    | 0 (3)      | 12 (3)    | 31 (4)     |
| C38A | 114 (6)   | 107 (6)    | 79 (5)    | -20 (4)    | 8 (4)     | 33 (4)     |

|      |         |         |         |         |         |         |
|------|---------|---------|---------|---------|---------|---------|
| C39  | 90 (4)  | 62 (3)  | 73 (5)  | 4 (3)   | 8 (3)   | 23 (3)  |
| C39A | 106 (5) | 77 (4)  | 100 (7) | -3 (5)  | 0 (4)   | 40 (4)  |
| C40  | 94 (4)  | 55 (4)  | 67 (4)  | 1 (3)   | -3 (4)  | 12 (3)  |
| C40A | 113 (5) | 58 (4)  | 102 (8) | 1 (6)   | -10 (6) | 14 (3)  |
| C41  | 88 (5)  | 86 (5)  | 75 (4)  | 12 (4)  | -3 (3)  | 12 (4)  |
| C41A | 87 (6)  | 104 (7) | 104 (7) | -3 (5)  | 9 (5)   | -35 (5) |
| C42  | 65 (3)  | 99 (5)  | 65 (4)  | 7 (3)   | -9 (3)  | -7 (3)  |
| C42A | 93 (6)  | 139 (9) | 95 (8)  | -21 (6) | -3 (6)  | -17 (6) |
| C43  | 66 (3)  | 90 (4)  | 67 (4)  | -9 (3)  | -10 (3) | 8 (3)   |
| C43A | 94 (5)  | 118 (7) | 109 (8) | -19 (5) | -6 (5)  | -8 (4)  |
| C44  | 84 (5)  | 75 (4)  | 68 (4)  | 4 (3)   | 1 (3)   | 25 (4)  |
| C44A | 88 (5)  | 113 (6) | 113 (8) | -6 (6)  | -4 (4)  | 14 (4)  |
| C45  | 78 (4)  | 63 (3)  | 45 (3)  | -5 (2)  | -4 (3)  | 12 (3)  |
| C45A | 100 (6) | 85 (5)  | 51 (5)  | -11 (3) | -13 (4) | 10 (4)  |

**Bond Lengths for compound 2-RT.**

| <b>Atom</b> | <b>Atom</b> | <b>Length/Å</b> | <b>Atom</b> | <b>Atom</b> | <b>Length/Å</b> |
|-------------|-------------|-----------------|-------------|-------------|-----------------|
| B1          | O11         | 1.490 (2)       | N16         | C41         | 1.450 (17)      |
| B1          | O12         | 1.441 (2)       | N16         | C41A        | 1.513 (16)      |
| B1          | O21         | 1.462 (3)       | N16         | C45         | 1.466 (15)      |
| B1          | O22         | 1.457 (3)       | N16         | C45A        | 1.484 (17)      |
| O10         | C10         | 1.216 (2)       | C31         | C32         | 1.56 (3)        |
| O11         | C10         | 1.317 (2)       | C31A        | C32A        | 1.46 (3)        |
| O12         | C12         | 1.342 (2)       | C32         | C33A        | 1.41 (2)        |
| O20         | C20         | 1.209 (2)       | C32A        | C33         | 1.63 (3)        |
| O21         | C20         | 1.322 (2)       | C33         | C34         | 1.511 (15)      |
| O22         | C22         | 1.343 (2)       | C33A        | C34A        | 1.527 (14)      |
| C10         | C11         | 1.479 (2)       | C34         | C35A        | 1.55 (2)        |
| C11         | C12         | 1.392 (2)       | C34A        | C35         | 1.506 (17)      |
| C11         | C16         | 1.390 (3)       | C35         | C39         | 1.539 (16)      |
| C12         | C13         | 1.393 (3)       | C35A        | C39A        | 1.545 (18)      |
| C13         | C14         | 1.372 (3)       | C36         | C37         | 1.467 (17)      |
| C14         | C15         | 1.385 (3)       | C36A        | C37A        | 1.56 (2)        |
| C15         | C16         | 1.376 (3)       | C37         | C38         | 1.504 (10)      |
| C20         | C21         | 1.473 (3)       | C37         | C45         | 1.536 (13)      |
| C21         | C22         | 1.400 (3)       | C37A        | C38A        | 1.474 (12)      |
| C21         | C26         | 1.388 (3)       | C37A        | C45A        | 1.512 (15)      |
| C22         | C23         | 1.390 (3)       | C38         | C39         | 1.525 (10)      |
| C23         | C24         | 1.377 (4)       | C38A        | C39A        | 1.542 (12)      |
| C24         | C25         | 1.377 (4)       | C39         | C40         | 1.503 (17)      |
| C25         | C26         | 1.375 (4)       | C39A        | C40A        | 1.56 (2)        |
| N1          | C31         | 1.541 (19)      | C41         | C42         | 1.561 (19)      |
| N1          | C31A        | 1.475 (13)      | C41A        | C42A        | 1.49 (2)        |
| N1          | C35         | 1.521 (17)      | C42         | C43         | 1.508 (10)      |
| N1          | C35A        | 1.529 (15)      | C42A        | C43A        | 1.455 (14)      |
| N1          | C36         | 1.612 (13)      | C43         | C44         | 1.531 (11)      |
| N1          | C36A        | 1.394 (16)      | C43A        | C44A        | 1.511 (13)      |
| N16         | C40         | 1.516 (16)      | C44         | C45         | 1.523 (13)      |
| N16         | C40A        | 1.419 (18)      | C44A        | C45A        | 1.501 (17)      |



**Bond Angles for compound 2-RT.**

| <b>Atom Atom Atom</b> | <b>Angle/°</b> | <b>Atom Atom Atom</b> | <b>Angle/°</b> |
|-----------------------|----------------|-----------------------|----------------|
| O12 B1 O11            | 113.01 (17)    | C45A N16 C41A         | 118.8 (8)      |
| O12 B1 O21            | 107.31 (15)    | N1 C31 C32            | 108.4 (12)     |
| O12 B1 O22            | 108.82 (17)    | C32A C31A N1          | 117.6 (11)     |
| O21 B1 O11            | 107.09 (16)    | C33A C32 C31          | 112.3 (12)     |
| O22 B1 O11            | 108.26 (15)    | C31A C32A C33         | 107.7 (15)     |
| O22 B1 O21            | 112.42 (17)    | C34 C33 C32A          | 104.5 (12)     |
| C10 O11 B1            | 121.97 (14)    | C32 C33A C34A         | 115.1 (12)     |
| C12 O12 B1            | 117.74 (14)    | C33 C34 C35A          | 113.4 (10)     |
| C20 O21 B1            | 122.06 (15)    | C35 C34A C33A         | 111.3 (9)      |
| C22 O22 B1            | 116.62 (15)    | N1 C35 C39            | 113.7 (10)     |
| O10 C10 O11           | 120.41 (16)    | C34A C35 N1           | 109.9 (10)     |
| O10 C10 C11           | 123.39 (17)    | C34A C35 C39          | 110.9 (10)     |
| O11 C10 C11           | 116.17 (15)    | N1 C35A C34           | 112.3 (11)     |
| C12 C11 C10           | 120.10 (16)    | N1 C35A C39A          | 105.7 (9)      |
| C16 C11 C10           | 120.39 (16)    | C39A C35A C34         | 117.1 (12)     |
| C16 C11 C12           | 119.50 (16)    | C37 C36 N1            | 114.1 (10)     |
| O12 C12 C11           | 121.76 (15)    | N1 C36A C37A          | 109.2 (12)     |
| O12 C12 C13           | 118.86 (16)    | C36 C37 C38           | 108.1 (9)      |
| C11 C12 C13           | 119.36 (17)    | C36 C37 C45           | 117.0 (10)     |
| C14 C13 C12           | 120.20 (19)    | C38 C37 C45           | 110.2 (8)      |
| C13 C14 C15           | 120.81 (19)    | C38A C37A C36A        | 110.8 (9)      |
| C16 C15 C14           | 119.22 (19)    | C38A C37A C45A        | 109.8 (11)     |
| C15 C16 C11           | 120.9 (2)      | C45A C37A C36A        | 111.2 (11)     |
| O20 C20 O21           | 120.62 (19)    | C37 C38 C39           | 107.0 (8)      |
| O20 C20 C21           | 123.07 (19)    | C37A C38A C39A        | 106.9 (9)      |
| O21 C20 C21           | 116.28 (16)    | C38 C39 C35           | 112.0 (9)      |
| C22 C21 C20           | 119.75 (17)    | C40 C39 C35           | 111.9 (9)      |
| C26 C21 C20           | 120.90 (18)    | C40 C39 C38           | 108.8 (9)      |
| C26 C21 C22           | 119.26 (19)    | C35A C39A C40A        | 112.4 (11)     |
| O22 C22 C21           | 120.63 (17)    | C38A C39A C35A        | 111.0 (10)     |
| O22 C22 C23           | 119.39 (17)    | C38A C39A C40A        | 108.7 (10)     |
| C23 C22 C21           | 119.97 (18)    | C39 C40 N16           | 108.5 (10)     |
| C24 C23 C22           | 119.4 (2)      | N16 C40A C39A         | 113.8 (11)     |
| C23 C24 C25           | 121.0 (2)      | N16 C41 C42           | 110.7 (10)     |
| C26 C25 C24           | 119.9 (2)      | C42A C41A N16         | 109.0 (11)     |
| C25 C26 C21           | 120.4 (2)      | C43 C42 C41           | 108.5 (9)      |
| C31 N1 C36            | 117.0 (9)      | C43A C42A C41A        | 116.8 (13)     |
| C31A N1 C35A          | 107.5 (7)      | C42 C43 C44           | 108.5 (7)      |
| C35 N1 C31            | 116.0 (9)      | C42A C43A C44A        | 111.2 (10)     |
| C35 N1 C36            | 110.0 (7)      | C45 C44 C43           | 111.5 (8)      |

|         |      |           |           |      |      |            |            |
|---------|------|-----------|-----------|------|------|------------|------------|
| C36AN1  | C31A | 108.4 (8) | C45A      | C44A | C43A | 112.7 (12) |            |
| C36AN1  | C35A | 116.6 (9) | N16       | C45  | C37  | 107.2 (8)  |            |
| C40AN16 | C41A | 111.2 (9) | N16       | C45  | C44  | 110.5 (10) |            |
| C40AN16 | C45A | 113.9 (8) | C44       | C45  | C37  | 112.2 (9)  |            |
| C41     | N16  | C40       | 103.6 (8) | N16  | C45A | C37A       | 114.2 (10) |
| C41     | N16  | C45       | 106.2 (7) | N16  | C45A | C44A       | 108.5 (11) |
| C45     | N16  | C40       | 109.1 (7) | C44A | C45A | C37A       | 114.6 (12) |

**Hydrogen Bonds for compound 2-RT.**

| <b>D</b> | <b>H</b> | <b>A</b> | <b>d(D-H)/Å</b> | <b>d(H-A)/Å</b> | <b>d(D-A)/Å</b> | <b>D-H-A/°</b> |
|----------|----------|----------|-----------------|-----------------|-----------------|----------------|
| N1       | H1       | N16      | 0.89 (3)        | 2.20 (2)        | 2.796 (3)       | 124 (2)        |

**Torsion Angles for compound 2-RT.**

| <b>A</b> | <b>B</b> | <b>C</b> | <b>D</b> | <b>Angle/°</b> | <b>A</b>         | <b>B</b>     | <b>C</b> | <b>D</b> | <b>Angle/°</b> |
|----------|----------|----------|----------|----------------|------------------|--------------|----------|----------|----------------|
| B1       | O11      | C10      | O10      | 166.94 (17)    | C31AN1           |              | C35AC39A |          | 178.5 (8)      |
| B1       | O11      | C10      | C11      | -15.2 (2)      | C31AN1           |              | C36AC37A |          | -178.2 (8)     |
| B1       | O12      | C12      | C11      | 20.0 (3)       | C31AC32AC33      |              | C34      |          | -58.8 (18)     |
| B1       | O12      | C12      | C13      | -161.53 (18)   | C32              | C33AC34AC35  |          |          | 56.5 (15)      |
| B1       | O21      | C20      | O20      | -173.7 (2)     | C32AC33          | C34          | C35A     |          | 58.3 (15)      |
| B1       | O21      | C20      | C21      | 8.3 (3)        | C33              | C34          | C35AN1   |          | -57.0 (13)     |
| B1       | O22      | C22      | C21      | -23.1 (2)      | C33              | C34          | C35AC39A |          | -179.5 (10)    |
| B1       | O22      | C22      | C23      | 158.09 (18)    | C33AC34AC35      | N1           |          |          | -50.4 (12)     |
| O10      | C10      | C11      | C12      | 176.14 (17)    | C33AC34AC35      | C39          |          |          | -177.0 (10)    |
| O10      | C10      | C11      | C16      | -2.8 (3)       | C34              | C35AC39AC38A |          |          | 69.2 (14)      |
| O11      | B1       | O12      | C12      | -34.2 (3)      | C34              | C35AC39AC40A |          |          | -168.8 (11)    |
| O11      | B1       | O21      | C20      | 85.3 (2)       | C34AC35          | C39          | C38      |          | 73.1 (13)      |
| O11      | B1       | O22      | C22      | -77.95 (19)    | C34AC35          | C39          | C40      |          | -164.5 (11)    |
| O11      | C10      | C11      | C12      | -1.7 (2)       | C35              | N1           | C31      | C32      | -50.2 (14)     |
| O11      | C10      | C11      | C16      | 179.40 (17)    | C35              | N1           | C36      | C37      | -47.3 (12)     |
| O12      | B1       | O11      | C10      | 33.0 (3)       | C35              | C39          | C40      | N16      | -62.0 (12)     |
| O12      | B1       | O21      | C20      | -153.05 (18)   | C35AN1           |              | C31AC32A |          | -57.2 (14)     |
| O12      | B1       | O22      | C22      | 158.87 (14)    | C35AN1           |              | C36AC37A |          | -56.8 (13)     |
| O12      | C12      | C13      | C14      | -178.18 (19)   | C35AC39AC40AN16  |              |          |          | -68.8 (12)     |
| O20      | C20      | C21      | C22      | -166.5 (2)     | C36              | N1           | C31      | C32      | 82.4 (14)      |
| O20      | C20      | C21      | C26      | 10.2 (3)       | C36              | N1           | C35      | C34A     | -84.3 (9)      |
| O21      | B1       | O11      | C10      | 150.94 (16)    | C36              | N1           | C35      | C39      | 40.8 (11)      |
| O21      | B1       | O12      | C12      | -152.01 (17)   | C36              | C37          | C38      | C39      | -67.5 (11)     |
| O21      | B1       | O22      | C22      | 40.1 (2)       | C36              | C37          | C45      | N16      | 60.9 (12)      |
| O21      | C20      | C21      | C22      | 11.4 (3)       | C36              | C37          | C45      | C44      | -60.6 (14)     |
| O21      | C20      | C21      | C26      | -171.94 (19)   | C36AN1           |              | C31AC32A |          | 69.6 (14)      |
| O22      | B1       | O11      | C10      | -87.6 (2)      | C36AN1           |              | C35AC34  |          | -72.2 (12)     |
| O22      | B1       | O12      | C12      | 86.1 (2)       | C36AN1           |              | C35AC39A |          | 56.6 (13)      |
| O22      | B1       | O21      | C20      | -33.4 (2)      | C36AC37AC38AC39A |              |          |          | -60.5 (14)     |
| O22      | C22      | C23      | C24      | 179.8 (2)      | C36AC37AC45AN16  |              |          |          | 67.3 (14)      |
| C10      | C11      | C12      | O12      | -0.8 (3)       | C36AC37AC45AC44A |              |          |          | -58.8 (16)     |
| C10      | C11      | C12      | C13      | -179.28 (16)   | C37              | C38          | C39      | C35      | 63.1 (12)      |
| C10      | C11      | C16      | C15      | 178.81 (18)    | C37              | C38          | C39      | C40      | -61.1 (12)     |
| C11      | C12      | C13      | C14      | 0.3 (3)        | C37AC38AC39AC35A |              |          |          | 62.4 (14)      |
| C12      | C11      | C16      | C15      | -0.1 (3)       | C37AC38AC39AC40A |              |          |          | -61.8 (14)     |
| C12      | C13      | C14      | C15      | 0.2 (3)        | C38              | C37          | C45      | N16      | -63.0 (12)     |
| C13      | C14      | C15      | C16      | -0.7 (4)       | C38              | C37          | C45      | C44      | 175.5 (10)     |
| C14      | C15      | C16      | C11      | 0.6 (3)        | C38              | C39          | C40      | N16      | 62.3 (10)      |
| C16      | C11      | C12      | O12      | 178.07 (18)    | C38AC37AC45AN16  |              |          |          | -55.6 (15)     |
| C16      | C11      | C12      | C13      | -0.4 (3)       | C38AC37AC45AC44A |              |          |          | 178.3 (11)     |

|      |      |      |      |            |      |      |      |      |            |
|------|------|------|------|------------|------|------|------|------|------------|
| C20  | C21  | C22  | O22  | -3.6(3)    | C38A | C39A | C40A | N16  | 54.5(13)   |
| C20  | C21  | C22  | C23  | 175.23(18) | C40  | N16  | C41  | C42  | -178.9(10) |
| C20  | C21  | C26  | C25  | -175.9(2)  | C40  | N16  | C45  | C37  | 62.6(11)   |
| C21  | C22  | C23  | C24  | 0.9(3)     | C40  | N16  | C45  | C44  | -174.8(9)  |
| C22  | C21  | C26  | C25  | 0.8(4)     | C40A | N16  | C41A | C42A | -179.0(11) |
| C22  | C23  | C24  | C25  | 0.3(4)     | C40A | N16  | C45A | C37A | 46.6(15)   |
| C23  | C24  | C25  | C26  | -1.0(5)    | C40A | N16  | C45A | C44A | 175.8(11)  |
| C24  | C25  | C26  | C21  | 0.4(5)     | C41  | N16  | C40  | C39  | -176.9(9)  |
| C26  | C21  | C22  | O22  | 179.70(18) | C41  | N16  | C45  | C37  | 173.8(10)  |
| C26  | C21  | C22  | C23  | -1.5(3)    | C41  | N16  | C45  | C44  | -63.7(12)  |
| N1   | C31  | C32  | C33A | 51.4(17)   | C41  | C42  | C43  | C44  | 54.3(12)   |
| N1   | C31A | C32A | C33  | 63.0(19)   | C41A | N16  | C40A | C39A | 176.4(10)  |
| N1   | C35  | C39  | C38  | -51.4(13)  | C41A | N16  | C45A | C37A | -179.4(11) |
| N1   | C35  | C39  | C40  | 71.0(12)   | C41A | N16  | C45A | C44A | -50.3(15)  |
| N1   | C35A | C39A | C38A | -56.7(13)  | C41A | C42A | C43A | C44A | 52.5(18)   |
| N1   | C35A | C39A | C40A | 65.4(13)   | C42  | C43  | C44  | C45  | -54.0(13)  |
| N1   | C36  | C37  | C38  | 61.1(11)   | C42A | C43A | C44A | C45A | -55.4(17)  |
| N1   | C36  | C37  | C45  | -63.9(12)  | C43  | C44  | C45  | N16  | 59.2(12)   |
| N1   | C36A | C37A | C38A | 58.5(13)   | C43  | C44  | C45  | C37  | 178.8(9)   |
| N1   | C36A | C37A | C45A | -63.9(13)  | C43A | C44A | C45A | N16  | 52.9(15)   |
| N16  | C41  | C42  | C43  | -63.3(13)  | C43A | C44A | C45A | C37A | -178.2(11) |
| N16  | C41A | C42A | C43A | -46.0(18)  | C45  | N16  | C40  | C39  | -64.1(10)  |
| C31  | N1   | C35  | C34A | 51.4(11)   | C45  | N16  | C41  | C42  | 66.1(13)   |
| C31  | N1   | C35  | C39  | 176.5(9)   | C45  | C37  | C38  | C39  | 61.4(12)   |
| C31  | N1   | C36  | C37  | 177.5(10)  | C45A | N16  | C40A | C39A | -46.3(12)  |
| C31  | C32  | C33A | C34A | -56.6(17)  | C45A | N16  | C41A | C42A | 46.0(17)   |
| C31A | N1   | C35A | C34  | 49.7(10)   | C45A | C37A | C38A | C39A | 62.7(14)   |

**Hydrogen Atom Coordinates ( $\text{\AA}\times 10^4$ ) and Isotropic Displacement Parameters ( $\text{\AA}^2\times 10^3$ ) for compound 2-RT.**

| Atom | <i>x</i>  | <i>y</i>  | <i>z</i>  | U(eq)  |
|------|-----------|-----------|-----------|--------|
| H13  | 5209      | 7034      | -318      | 74     |
| H14  | 7161      | 6880      | -253      | 82     |
| H15  | 8022      | 6104      | 733       | 83     |
| H16  | 6908      | 5517      | 1666      | 73     |
| H23  | 2824      | 9016      | 2457      | 81     |
| H24  | 1330      | 9346      | 3222      | 103    |
| H25  | -271      | 8230      | 3208      | 112    |
| H26  | -415      | 6792      | 2404      | 90     |
| H1   | 4160 (20) | 5410 (20) | 3442 (13) | 67 (6) |
| H31A | 3479      | 3597      | 3253      | 139    |
| H31B | 2834      | 4503      | 2801      | 139    |
| H31C | 2935      | 4436      | 2846      | 77     |
| H31D | 3624      | 3621      | 3329      | 77     |
| H32A | 1417      | 3425      | 3361      | 93     |
| H32B | 2014      | 3563      | 4097      | 93     |
| H32C | 2093      | 3547      | 4102      | 128    |
| H32D | 1767      | 3115      | 3342      | 128    |
| H33A | 917       | 4961      | 3061      | 115    |
| H33B | 305       | 4490      | 3742      | 115    |
| H33C | 478       | 4649      | 4042      | 109    |
| H33D | 926       | 5212      | 3349      | 109    |
| H34A | 1572      | 5469      | 4467      | 116    |
| H34B | 966       | 6320      | 3961      | 116    |
| H34C | 1228      | 6429      | 4285      | 105    |
| H34D | 1909      | 5510      | 4702      | 105    |
| H35  | 2629      | 6555      | 3448      | 86     |
| H35A | 2584      | 6367      | 3226      | 91     |
| H36A | 3815      | 4431      | 4716      | 85     |
| H36B | 4886      | 4267      | 4231      | 85     |
| H36C | 4563      | 4254      | 4292      | 94     |
| H36D | 3358      | 4489      | 4628      | 94     |
| H37  | 5268      | 5414      | 5163      | 83     |
| H37A | 4731      | 5576      | 5239      | 103    |
| H38A | 4335      | 7098      | 5302      | 99     |
| H38B | 3423      | 6131      | 5281      | 99     |
| H38C | 3936      | 7339      | 5129      | 120    |
| H38D | 2970      | 6423      | 5131      | 120    |
| H39  | 2875      | 7598      | 4517      | 90     |
| H39A | 2671      | 7685      | 4178      | 113    |

|      |      |      |      |     |
|------|------|------|------|-----|
| H40A | 4697 | 8243 | 4252 | 86  |
| H40B | 4011 | 8052 | 3547 | 86  |
| H40C | 4072 | 7773 | 3253 | 109 |
| H40D | 4522 | 8271 | 3966 | 109 |
| H41A | 6399 | 8082 | 3701 | 99  |
| H41B | 5739 | 7965 | 2982 | 99  |
| H41C | 5953 | 7509 | 2803 | 118 |
| H41D | 6461 | 8047 | 3493 | 118 |
| H42A | 6788 | 6268 | 2737 | 92  |
| H42B | 7626 | 7290 | 2808 | 92  |
| H42C | 6982 | 5956 | 2927 | 131 |
| H42D | 7841 | 6929 | 3073 | 131 |
| H43A | 8058 | 6800 | 3966 | 89  |
| H43B | 8258 | 5738 | 3492 | 89  |
| H43C | 7827 | 6584 | 4235 | 129 |
| H43D | 8069 | 5456 | 3839 | 129 |
| H44A | 6492 | 4998 | 3818 | 90  |
| H44B | 7150 | 5292 | 4516 | 90  |
| H44C | 6202 | 4883 | 3998 | 125 |
| H44D | 6708 | 5203 | 4738 | 125 |
| H45  | 6113 | 6969 | 4621 | 75  |
| H45A | 5816 | 6906 | 4700 | 95  |

**Atomic Occupancy for compound 2-RT.**

| <b>Atom</b> | <b>Occupancy</b> | <b>Atom</b> | <b>Occupancy</b> | <b>Atom</b> | <b>Occupancy</b> |
|-------------|------------------|-------------|------------------|-------------|------------------|
| C31         | 0.5              | H31A        | 0.5              | H31B        | 0.5              |
| C31A        | 0.5              | H31C        | 0.5              | H31D        | 0.5              |
| C32         | 0.5              | H32A        | 0.5              | H32B        | 0.5              |
| C32A        | 0.5              | H32C        | 0.5              | H32D        | 0.5              |
| C33         | 0.5              | H33A        | 0.5              | H33B        | 0.5              |
| C33A        | 0.5              | H33C        | 0.5              | H33D        | 0.5              |
| C34         | 0.5              | H34A        | 0.5              | H34B        | 0.5              |
| C34A        | 0.5              | H34C        | 0.5              | H34D        | 0.5              |
| C35         | 0.5              | H35         | 0.5              | C35A        | 0.5              |
| H35A        | 0.5              | C36         | 0.5              | H36A        | 0.5              |
| H36B        | 0.5              | C36A        | 0.5              | H36C        | 0.5              |
| H36D        | 0.5              | C37         | 0.5              | H37         | 0.5              |
| C37A        | 0.5              | H37A        | 0.5              | C38         | 0.5              |
| H38A        | 0.5              | H38B        | 0.5              | C38A        | 0.5              |
| H38C        | 0.5              | H38D        | 0.5              | C39         | 0.5              |
| H39         | 0.5              | C39A        | 0.5              | H39A        | 0.5              |
| C40         | 0.5              | H40A        | 0.5              | H40B        | 0.5              |
| C40A        | 0.5              | H40C        | 0.5              | H40D        | 0.5              |
| C41         | 0.5              | H41A        | 0.5              | H41B        | 0.5              |
| C41A        | 0.5              | H41C        | 0.5              | H41D        | 0.5              |
| C42         | 0.5              | H42A        | 0.5              | H42B        | 0.5              |
| C42A        | 0.5              | H42C        | 0.5              | H42D        | 0.5              |
| C43         | 0.5              | H43A        | 0.5              | H43B        | 0.5              |
| C43A        | 0.5              | H43C        | 0.5              | H43D        | 0.5              |
| C44         | 0.5              | H44A        | 0.5              | H44B        | 0.5              |
| C44A        | 0.5              | H44C        | 0.5              | H44D        | 0.5              |
| C45         | 0.5              | H45         | 0.5              | C45A        | 0.5              |
| H45A        | 0.5              |             |                  |             |                  |



**Table 4 Crystal data and structure refinement for compound 3.**

|                                             |                                                                               |
|---------------------------------------------|-------------------------------------------------------------------------------|
| Identification code                         | lawr12f                                                                       |
| Empirical formula                           | C <sub>86</sub> H <sub>88</sub> B <sub>4</sub> N <sub>4</sub> O <sub>24</sub> |
| Formula weight                              | 1604.84                                                                       |
| Temperature/K                               | 100.00(10)                                                                    |
| Crystal system                              | monoclinic                                                                    |
| Space group                                 | P2 <sub>1</sub>                                                               |
| a/Å                                         | 12.29380(10)                                                                  |
| b/Å                                         | 19.4089(2)                                                                    |
| c/Å                                         | 16.2958(2)                                                                    |
| α/°                                         | 90                                                                            |
| β/°                                         | 90.4770(10)                                                                   |
| γ/°                                         | 90                                                                            |
| Volume/Å <sup>3</sup>                       | 3888.19(7)                                                                    |
| Z                                           | 2                                                                             |
| ρ <sub>calc</sub> /g/cm <sup>3</sup>        | 1.371                                                                         |
| μ/mm <sup>-1</sup>                          | 0.820                                                                         |
| F(000)                                      | 1688.0                                                                        |
| Crystal size/mm <sup>3</sup>                | 0.4 × 0.2 × 0.2                                                               |
| Radiation                                   | CuKα (λ = 1.54184)                                                            |
| 2θ range for data collection/°              | 7.084 to 134.994                                                              |
| Index ranges                                | -14 ≤ h ≤ 14, -23 ≤ k ≤ 23, -13 ≤ l ≤ 19                                      |
| Reflections collected                       | 22164                                                                         |
| Independent reflections                     | 13854 [R <sub>int</sub> = 0.0242, R <sub>sigma</sub> = 0.0368]                |
| Data/restraints/parameters                  | 13854/3/1159                                                                  |
| Completeness to theta = 66.5°               | 99.6%                                                                         |
| Goodness-of-fit on F <sup>2</sup>           | 1.018                                                                         |
| Final R indexes [I ≥ 2σ (I)]                | R <sub>1</sub> = 0.0490, wR <sub>2</sub> = 0.1269                             |
| Final R indexes [all data]                  | R <sub>1</sub> = 0.0501, wR <sub>2</sub> = 0.1278                             |
| Largest diff. peak/hole / e Å <sup>-3</sup> | 0.33/-0.22                                                                    |
| Flack parameter                             | -0.20(10)                                                                     |

**Fractional Atomic Coordinates ( $\times 10^4$ ) and Equivalent Isotropic Displacement Parameters ( $\text{\AA}^2 \times 10^3$ ) for compound 3.  $U_{\text{eq}}$  is defined as 1/3 of the trace of the orthogonalised  $U_{ij}$  tensor.**

| Atom | <i>x</i>  | <i>y</i>    | <i>z</i>    | $U(\text{eq})$ |
|------|-----------|-------------|-------------|----------------|
| B1   | 1187 (4)  | 6035 (2)    | 6660 (3)    | 33.5 (9)       |
| O10  | -926 (2)  | 5123.2 (14) | 5588.5 (18) | 37.2 (6)       |
| O11  | 575 (2)   | 5477.8 (14) | 6212.8 (18) | 37.0 (6)       |
| O12  | 483 (2)   | 6418.5 (15) | 7202.0 (18) | 38.5 (6)       |
| O20  | 2921 (3)  | 6899.3 (17) | 5238.8 (19) | 53.8 (8)       |
| O21  | 1618 (2)  | 6502.9 (15) | 6029.7 (18) | 40.3 (6)       |
| O22  | 2000 (2)  | 5695.2 (16) | 7153.5 (18) | 39.7 (7)       |
| C10  | -446 (3)  | 5561.3 (18) | 5987 (2)    | 27.7 (7)       |
| C11  | -1006 (3) | 6186.6 (17) | 6291 (2)    | 25.6 (7)       |
| C12  | -524 (3)  | 6573.0 (19) | 6919 (2)    | 28.9 (7)       |
| C13  | -1087 (3) | 7119 (2)    | 7262 (2)    | 34.7 (8)       |
| C14  | -2106 (3) | 7292 (2)    | 6956 (2)    | 36.3 (9)       |
| C15  | -2572 (3) | 6924 (2)    | 6319 (2)    | 35.2 (8)       |
| C16  | -2030 (3) | 6366 (2)    | 5994 (2)    | 30.0 (7)       |
| C20  | 2648 (4)  | 6522 (2)    | 5794 (2)    | 37.4 (9)       |
| C21  | 3405 (3)  | 6079 (2)    | 6250 (2)    | 33.3 (8)       |
| C22  | 3052 (3)  | 5686.6 (19) | 6914 (2)    | 30.1 (7)       |
| C23  | 3775 (3)  | 5285 (2)    | 7354 (3)    | 37.5 (9)       |
| C24  | 4860 (4)  | 5271 (2)    | 7128 (3)    | 46.9 (11)      |
| C25  | 5220 (4)  | 5657 (3)    | 6475 (4)    | 57.1 (13)      |
| C26  | 4503 (4)  | 6065 (3)    | 6051 (3)    | 52.2 (12)      |
| B2   | 6206 (4)  | 3850 (2)    | 8352 (3)    | 38.1 (10)      |
| O10A | 4179 (3)  | 4799.6 (15) | 9448 (2)    | 51.5 (8)       |
| O11A | 5640 (2)  | 4419.8 (14) | 8807 (2)    | 42.4 (7)       |
| O12A | 5462 (2)  | 3480.3 (15) | 7826 (2)    | 43.2 (7)       |
| O20A | 7975 (3)  | 2998.1 (19) | 9780 (2)    | 60.5 (10)      |
| O21A | 6648 (3)  | 3380.7 (15) | 8984 (2)    | 44.8 (7)       |
| O22A | 7009 (2)  | 4165.2 (16) | 7842.9 (18) | 41.4 (7)       |
| C10A | 4624 (3)  | 4355 (2)    | 9046 (3)    | 36.7 (9)       |
| C11A | 4024 (3)  | 3746.8 (19) | 8745 (2)    | 31.5 (8)       |
| C12A | 4457 (3)  | 3349.2 (19) | 8116 (2)    | 33.6 (8)       |
| C13A | 3856 (4)  | 2821 (2)    | 7769 (3)    | 42.0 (9)       |
| C14A | 2838 (4)  | 2666 (2)    | 8077 (3)    | 44.2 (10)      |
| C15A | 2419 (3)  | 3041 (2)    | 8723 (3)    | 46.2 (11)      |
| C16A | 2997 (3)  | 3585 (2)    | 9049 (3)    | 39.6 (9)       |
| C20A | 7686 (4)  | 3376 (2)    | 9237 (2)    | 41.5 (10)      |
| C21A | 8423 (3)  | 3821 (2)    | 8780 (2)    | 34.3 (8)       |
| C22A | 8059 (3)  | 4193.4 (19) | 8102 (2)    | 29.7 (7)       |

|      |           |             |             |           |
|------|-----------|-------------|-------------|-----------|
| C23A | 8775 (3)  | 4597 (2)    | 7655 (3)    | 36.7 (8)  |
| C24A | 9858 (4)  | 4627 (2)    | 7896 (3)    | 45.6 (10) |
| C25A | 10220 (4) | 4265 (3)    | 8563 (4)    | 60.0 (14) |
| C26A | 9514 (4)  | 3861 (3)    | 8999 (3)    | 53.6 (12) |
| B3   | 3970 (4)  | 3749 (3)    | 2008 (3)    | 41.3 (11) |
| O10B | 2419 (2)  | 2603.7 (14) | 722.4 (18)  | 39.8 (6)  |
| O11B | 3627 (2)  | 3147.4 (15) | 1483.1 (18) | 39.9 (6)  |
| O12B | 3053 (4)  | 4049 (2)    | 2414 (3)    | 42.4 (9)  |
| O12D | 3318 (7)  | 4436 (5)    | 1844 (5)    | 32.3 (18) |
| O20B | 5949 (4)  | 4546 (2)    | 802 (3)     | 40.0 (9)  |
| O20D | 4693 (8)  | 3053 (5)    | 3850 (6)    | 40 (2)    |
| O21B | 4490 (4)  | 4209 (2)    | 1483 (2)    | 36.3 (9)  |
| O21D | 3959 (8)  | 3617 (5)    | 2798 (5)    | 27.7 (17) |
| O22B | 4655 (4)  | 3449 (2)    | 2674 (3)    | 42.2 (10) |
| O22D | 5092 (9)  | 4038 (5)    | 1698 (7)    | 35 (2)    |
| C10B | 2647 (3)  | 3094.5 (19) | 1165 (2)    | 31.3 (8)  |
| C11B | 1858 (3)  | 3640 (2)    | 1371 (2)    | 31.8 (8)  |
| C12B | 2092 (5)  | 4074 (3)    | 1996 (4)    | 37.8 (13) |
| C12D | 2249 (11) | 4303 (8)    | 1731 (9)    | 29 (3)    |
| C13B | 1324 (6)  | 4576 (4)    | 2215 (4)    | 47.9 (16) |
| C13D | 1503 (13) | 4838 (9)    | 1910 (10)   | 40 (3)    |
| C14B | 363 (4)   | 4645 (3)    | 1799 (3)    | 57.7 (13) |
| C15B | 81 (4)    | 4140 (3)    | 1240 (4)    | 60.1 (13) |
| C16B | 832 (4)   | 3638 (3)    | 1030 (4)    | 53.3 (12) |
| C20B | 5532 (5)  | 4165 (3)    | 1304 (4)    | 33.9 (12) |
| C20D | 4788 (10) | 3289 (6)    | 3167 (9)    | 29 (2)    |
| C21B | 6169 (9)  | 3662 (4)    | 1784 (5)    | 32 (2)    |
| C21D | 5807 (16) | 3256 (12)   | 2709 (12)   | 25 (5)    |
| C22B | 5711 (6)  | 3333 (4)    | 2454 (7)    | 33 (2)    |
| C22D | 5926 (16) | 3617 (13)   | 1997 (15)   | 24 (5)    |
| C23B | 6346 (11) | 2885 (4)    | 2964 (6)    | 39 (2)    |
| C23D | 6850 (20) | 3623 (13)   | 1534 (16)   | 42 (6)    |
| C24B | 7433 (9)  | 2772 (4)    | 2733 (7)    | 40 (2)    |
| C24D | 7682 (19) | 3209 (14)   | 1808 (14)   | 37 (5)    |
| C25B | 7875 (6)  | 3094 (4)    | 2070 (7)    | 41 (2)    |
| C25D | 7630 (20) | 2842 (17)   | 2476 (18)   | 45 (7)    |
| C26B | 7236 (9)  | 3539 (3)    | 1598 (4)    | 34.6 (16) |
| C26D | 6710 (20) | 2859 (17)   | 2924 (19)   | 40 (8)    |
| B4   | 8932 (4)  | 6230 (3)    | 2974 (3)    | 41.3 (11) |
| O10C | 7468 (2)  | 7334.3 (14) | 4346.4 (17) | 35.3 (6)  |
| O11C | 8612 (2)  | 6832.8 (15) | 3498.3 (18) | 37.9 (6)  |
| O12C | 8000 (3)  | 5916.5 (18) | 2581 (2)    | 46.2 (8)  |

|      |            |             |           |           |
|------|------------|-------------|-----------|-----------|
| O12E | 8300 (20)  | 5521 (16)   | 3155 (18) | 41 (6)    |
| O20C | 10916 (3)  | 5396.6 (18) | 4215 (2)  | 43.2 (8)  |
| O20E | 9760 (20)  | 6897 (14)   | 1225 (16) | 61 (6)    |
| O21C | 9454 (3)   | 5734.1 (16) | 3508 (2)  | 35.2 (7)  |
| O21E | 8960 (20)  | 6349 (14)   | 2253 (15) | 54 (6)    |
| O22C | 9625 (3)   | 6503.2 (18) | 2333 (2)  | 40.5 (8)  |
| O22E | 10060 (30) | 5891 (17)   | 3400 (20) | 62 (7)    |
| C10C | 7664 (3)   | 6865.6 (19) | 3871 (2)  | 30.1 (7)  |
| C10H | 9760 (30)  | 6656 (17)   | 1870 (20) | 46 (7)    |
| C11C | 6854 (3)   | 6331 (2)    | 3652 (2)  | 33.7 (8)  |
| C12C | 7055 (5)   | 5892 (3)    | 3004 (3)  | 40.3 (12) |
| C12E | 7220 (40)  | 5690 (30)   | 3250 (30) | 37 (12)   |
| C13C | 6266 (5)   | 5408 (3)    | 2778 (3)  | 50.7 (13) |
| C13E | 6480 (40)  | 5130 (30)   | 3080 (30) | 48 (11)   |
| C14C | 5310 (5)   | 5363 (3)    | 3203 (3)  | 60.3 (14) |
| C15C | 5092 (4)   | 5821 (3)    | 3832 (4)  | 59.4 (13) |
| C16C | 5864 (4)   | 6308 (3)    | 4054 (3)  | 48.2 (11) |
| C20C | 10510 (5)  | 5774 (2)    | 3705 (3)  | 34.5 (10) |
| C21C | 11133 (4)  | 6275 (2)    | 3208 (3)  | 40.3 (10) |
| C22C | 10693 (4)  | 6607 (2)    | 2533 (3)  | 40.7 (9)  |
| C23C | 11342 (5)  | 7037 (2)    | 2059 (3)  | 55.3 (13) |
| C24C | 12408 (5)  | 7140 (2)    | 2268 (4)  | 61.3 (16) |
| C25C | 12853 (4)  | 6810 (3)    | 2936 (4)  | 55.1 (12) |
| C26C | 12227 (4)  | 6377 (2)    | 3409 (3)  | 49.7 (11) |
| N1   | -1391 (3)  | 3985.1 (16) | 4699 (2)  | 30.4 (6)  |
| N16  | 1251 (3)   | 3512.9 (16) | 5653 (2)  | 31.9 (7)  |
| C31  | -2427 (3)  | 4317 (2)    | 4387 (3)  | 42.8 (10) |
| C32  | -3233 (4)  | 4427 (2)    | 5075 (4)  | 52.0 (12) |
| C33  | -3466 (4)  | 3766 (3)    | 5530 (4)  | 56.3 (13) |
| C34  | -2395 (4)  | 3442 (3)    | 5840 (3)  | 45.1 (10) |
| C35  | -1625 (3)  | 3315.8 (19) | 5128 (3)  | 34.8 (8)  |
| C36  | -605 (3)   | 3910.6 (19) | 4006 (2)  | 33.0 (8)  |
| C37  | 413 (3)    | 3503.5 (19) | 4242 (2)  | 31.2 (8)  |
| C38  | 81 (3)     | 2810.8 (19) | 4589 (2)  | 33.8 (8)  |
| C39  | -563 (3)   | 2953.0 (18) | 5375 (2)  | 32.5 (8)  |
| C40  | 152 (3)    | 3365 (2)    | 5992 (2)  | 33.9 (8)  |
| C41  | 1962 (4)   | 3894 (2)    | 6254 (3)  | 43.7 (10) |
| C42  | 3091 (4)   | 3974 (2)    | 5926 (4)  | 54.0 (13) |
| C43  | 3065 (4)   | 4351 (2)    | 5103 (4)  | 56.5 (13) |
| C44  | 2309 (4)   | 3982 (2)    | 4502 (3)  | 43.5 (10) |
| C45  | 1169 (3)   | 3895.1 (18) | 4844 (2)  | 29.7 (7)  |
| N1A  | 3687 (3)   | 5958.1 (18) | 10267 (2) | 35.9 (7)  |

|      |          |             |           |           |
|------|----------|-------------|-----------|-----------|
| N16A | 6301 (3) | 6419.5 (18) | 9290 (2)  | 36.3 (7)  |
| C31A | 2659 (4) | 5635 (3)    | 10593 (3) | 49.1 (11) |
| C32A | 1845 (4) | 5494 (3)    | 9915 (4)  | 57.7 (13) |
| C33A | 1594 (4) | 6139 (3)    | 9421 (4)  | 65.8 (15) |
| C34A | 2643 (4) | 6469 (3)    | 9104 (3)  | 56.0 (12) |
| C35A | 3432 (4) | 6612 (2)    | 9818 (3)  | 46 (1)    |
| C36A | 4484 (4) | 6057 (2)    | 10953 (2) | 39.7 (9)  |
| C37A | 5495 (4) | 6458 (2)    | 10699 (2) | 39.0 (9)  |
| C38A | 5148 (4) | 7135 (2)    | 10331 (3) | 44.3 (10) |
| C39A | 4489 (4) | 6979 (2)    | 9550 (3)  | 43.6 (10) |
| C40A | 5206 (4) | 6557 (2)    | 8940 (3)  | 40.3 (9)  |
| C41A | 6244 (3) | 6056 (2)    | 10109 (2) | 34.4 (8)  |
| C42A | 7388 (4) | 5973 (2)    | 10450 (3) | 45.3 (10) |
| C43A | 8120 (4) | 5590 (2)    | 9858 (3)  | 53.9 (12) |
| C44A | 8136 (4) | 5955 (2)    | 9035 (3)  | 51.9 (12) |
| C45A | 7000 (4) | 6026 (2)    | 8702 (3)  | 46.1 (11) |

**Anisotropic Displacement Parameters ( $\text{\AA}^2 \times 10^3$ ) for compound 3. The Anisotropic displacement factor exponent takes the form:  $-2\pi^2[h^2a^*U_{11}+2hka^*b^*U_{12}+\dots]$ .**

| Atom | $U_{11}$  | $U_{22}$  | $U_{33}$  | $U_{23}$  | $U_{13}$   | $U_{12}$   |
|------|-----------|-----------|-----------|-----------|------------|------------|
| B1   | 30 (2)    | 26 (2)    | 44 (2)    | 4.5 (18)  | -7.7 (17)  | 0.6 (16)   |
| O10  | 41.7 (15) | 24.8 (13) | 45.0 (15) | -7.0 (11) | -5.9 (12)  | -2.2 (11)  |
| O11  | 33.0 (14) | 24.8 (13) | 53.1 (16) | -4.5 (12) | -7.4 (12)  | 7.3 (11)   |
| O12  | 35.4 (14) | 34.2 (15) | 45.8 (15) | -6.7 (12) | -11.0 (12) | 0.1 (11)   |
| O20  | 84 (3)    | 38.3 (17) | 38.9 (16) | 7.9 (13)  | 6.2 (15)   | -2.7 (16)  |
| O21  | 44.1 (16) | 32.4 (14) | 44.3 (15) | 10.4 (12) | -11.7 (12) | -2.1 (12)  |
| O22  | 27.8 (13) | 46.3 (16) | 44.8 (15) | 17.0 (13) | -3.8 (11)  | -0.3 (12)  |
| C10  | 31.2 (18) | 17.5 (16) | 34.3 (18) | -0.8 (13) | -2.7 (14)  | -0.5 (13)  |
| C11  | 30.2 (17) | 16.4 (15) | 30.1 (16) | 3.8 (12)  | 4.4 (13)   | -2.7 (13)  |
| C12  | 31.2 (18) | 23.2 (17) | 32.2 (17) | 4.1 (14)  | -0.3 (14)  | -3.9 (14)  |
| C13  | 48 (2)    | 24.6 (18) | 31.2 (18) | -2.5 (14) | 6.5 (16)   | -2.1 (16)  |
| C14  | 44 (2)    | 28.6 (19) | 37 (2)    | 1.1 (16)  | 17.0 (17)  | 6.1 (16)   |
| C15  | 31.4 (19) | 31 (2)    | 43 (2)    | 5.1 (16)  | 7.7 (15)   | 5.4 (15)   |
| C16  | 29.4 (18) | 28.2 (18) | 32.4 (17) | 4.2 (14)  | -0.3 (14)  | -3.5 (14)  |
| C20  | 57 (3)    | 26.2 (19) | 29.1 (18) | -2.5 (15) | -2.9 (17)  | -3.9 (17)  |
| C21  | 38 (2)    | 28.1 (18) | 33.8 (18) | -6.7 (15) | 2.2 (15)   | -2.6 (15)  |
| C22  | 30.4 (18) | 27.2 (18) | 32.6 (18) | -2.7 (14) | -3.1 (14)  | -2.5 (14)  |
| C23  | 34 (2)    | 38 (2)    | 40 (2)    | -1.6 (17) | -7.1 (16)  | 1.4 (16)   |
| C24  | 33 (2)    | 46 (3)    | 61 (3)    | -12 (2)   | -9.0 (19)  | 4.1 (18)   |
| C25  | 33 (2)    | 58 (3)    | 80 (4)    | -14 (3)   | 14 (2)     | -1 (2)     |
| C26  | 49 (3)    | 49 (3)    | 60 (3)    | -1 (2)    | 19 (2)     | -7 (2)     |
| B2   | 34 (2)    | 32 (2)    | 49 (3)    | 2.5 (19)  | 17.0 (19)  | -2.7 (18)  |
| O10A | 60 (2)    | 25.6 (15) | 69 (2)    | -7.0 (14) | 21.9 (16)  | 5.9 (13)   |
| O11A | 35.6 (15) | 27.9 (14) | 63.8 (19) | -3.2 (13) | 16.0 (13)  | -8.0 (11)  |
| O12A | 38.6 (15) | 32.9 (15) | 58.4 (18) | -8.2 (13) | 16.0 (13)  | -1.7 (12)  |
| O20A | 89 (3)    | 47 (2)    | 45.7 (18) | 17.1 (16) | 4.1 (17)   | 6.2 (18)   |
| O21A | 44.3 (16) | 36.4 (16) | 54.1 (17) | 13.5 (13) | 20.7 (14)  | 3.0 (13)   |
| O22A | 30.7 (14) | 48.1 (17) | 45.5 (16) | 16.4 (13) | 4.6 (12)   | -2.4 (12)  |
| C10A | 37 (2)    | 23.2 (18) | 50 (2)    | 5.6 (16)  | 11.1 (17)  | 1.3 (15)   |
| C11A | 29.4 (18) | 23.1 (17) | 42 (2)    | 12.0 (15) | 1.2 (15)   | 3.2 (14)   |
| C12A | 32.2 (19) | 25.0 (18) | 44 (2)    | 8.9 (16)  | 2.9 (16)   | 3.2 (15)   |
| C13A | 51 (2)    | 34 (2)    | 41 (2)    | 5.0 (17)  | -8.0 (18)  | -0.5 (18)  |
| C14A | 44 (2)    | 40 (2)    | 49 (2)    | 11.9 (19) | -17.1 (19) | -10.8 (19) |
| C15A | 27.6 (19) | 48 (3)    | 63 (3)    | 20 (2)    | -9.0 (18)  | -9.2 (18)  |
| C16A | 35 (2)    | 38 (2)    | 46 (2)    | 11.8 (18) | 5.2 (17)   | 3.8 (17)   |
| C20A | 60 (3)    | 30 (2)    | 34 (2)    | 3.3 (16)  | 12.5 (18)  | 2.6 (19)   |
| C21A | 39 (2)    | 28.4 (18) | 35.7 (19) | -1.7 (15) | 3.7 (15)   | 4.4 (16)   |
| C22A | 28.2 (18) | 28.1 (18) | 32.8 (18) | 0.0 (14)  | 7.4 (14)   | 3.6 (14)   |
| C23A | 35 (2)    | 37 (2)    | 38 (2)    | -0.3 (16) | 7.5 (16)   | -2.5 (16)  |

|      |           |           |           |            |           |            |
|------|-----------|-----------|-----------|------------|-----------|------------|
| C24A | 34 (2)    | 40 (2)    | 63 (3)    | -2 (2)     | 10.2 (19) | -5.3 (18)  |
| C25A | 33 (2)    | 55 (3)    | 91 (4)    | -5 (3)     | -13 (2)   | -1 (2)     |
| C26A | 52 (3)    | 47 (3)    | 62 (3)    | 7 (2)      | -18 (2)   | 7 (2)      |
| B3   | 44 (3)    | 41 (3)    | 39 (2)    | -11 (2)    | -5 (2)    | 3 (2)      |
| O10B | 47.0 (16) | 22.4 (13) | 49.9 (16) | -1.6 (12)  | -7.7 (13) | 5.7 (12)   |
| O11B | 39.1 (15) | 40.0 (15) | 40.7 (15) | -11.6 (12) | -4.2 (12) | 6.8 (12)   |
| O12B | 53 (3)    | 37 (2)    | 37 (2)    | -8.7 (17)  | 2.5 (18)  | 0.7 (19)   |
| O20B | 47 (2)    | 33 (2)    | 40 (2)    | 13.3 (17)  | -4.9 (17) | -7.8 (18)  |
| O21B | 42 (2)    | 27.6 (19) | 39 (2)    | 6.6 (16)   | -4.8 (18) | -1.2 (17)  |
| O22B | 58 (3)    | 35 (2)    | 33 (2)    | 6.3 (18)   | -5 (2)    | -7 (2)     |
| C10B | 42 (2)    | 25.3 (18) | 26.2 (17) | 5.7 (14)   | 1.8 (14)  | 0.8 (15)   |
| C11B | 41 (2)    | 27.5 (18) | 26.8 (17) | 6.3 (14)   | 5.0 (15)  | 4.2 (15)   |
| C12B | 47 (4)    | 28 (3)    | 39 (3)    | 2 (3)      | 15 (3)    | 1 (3)      |
| C13B | 64 (4)    | 37 (3)    | 43 (3)    | -10 (3)    | 18 (3)    | 12 (3)     |
| C14B | 58 (3)    | 59 (3)    | 56 (3)    | 2 (2)      | 18 (2)    | 27 (3)     |
| C15B | 45 (3)    | 54 (3)    | 82 (4)    | 8 (3)      | -2 (2)    | 13 (2)     |
| C16B | 50 (3)    | 36 (2)    | 74 (3)    | -3 (2)     | -9 (2)    | 5 (2)      |
| C20B | 48 (3)    | 19 (2)    | 34 (3)    | 0 (2)      | -10 (3)   | -2 (2)     |
| C21B | 53 (5)    | 21 (3)    | 21 (4)    | -1 (3)     | -5 (4)    | -5 (3)     |
| C22B | 49 (4)    | 20 (3)    | 31 (4)    | 2 (3)      | -10 (4)   | -7 (2)     |
| C23B | 59 (7)    | 21 (4)    | 38 (4)    | 1 (2)      | -5 (5)    | -13 (5)    |
| C24B | 53 (6)    | 22 (3)    | 42 (5)    | 9 (3)      | -22 (4)   | -3 (3)     |
| C25B | 46 (4)    | 33 (4)    | 44 (4)    | 5 (3)      | -15 (4)   | 3 (3)      |
| C26B | 48 (5)    | 19 (3)    | 36 (3)    | 0 (2)      | -15 (3)   | 1 (3)      |
| B4   | 53 (3)    | 31 (2)    | 40 (2)    | -3.3 (19)  | 9 (2)     | -1 (2)     |
| O10C | 43.2 (15) | 25.8 (13) | 37.1 (14) | -4.2 (11)  | 4.3 (11)  | -8.7 (11)  |
| O11C | 38.9 (15) | 31.5 (14) | 43.5 (15) | -6.1 (12)  | 3.5 (12)  | -5.5 (12)  |
| O12C | 66 (2)    | 33.5 (17) | 38.9 (17) | -9.7 (14)  | 1.1 (15)  | -2.2 (16)  |
| O20C | 51 (2)    | 32.9 (17) | 45.7 (19) | 14.4 (15)  | 8.6 (15)  | 5.4 (15)   |
| O21C | 45 (2)    | 26.2 (16) | 34.6 (17) | 5.4 (12)   | 6.6 (14)  | -0.3 (14)  |
| O22C | 56 (2)    | 31.6 (17) | 33.7 (18) | 8.3 (14)   | 10.2 (16) | 5.4 (16)   |
| C10C | 35.8 (19) | 25.3 (18) | 29.0 (17) | 3.2 (14)   | -1.4 (14) | -6.6 (15)  |
| C11C | 45 (2)    | 24.9 (18) | 31.5 (18) | 5.3 (14)   | -8.1 (15) | -10.3 (16) |
| C12C | 61 (3)    | 30 (2)    | 30 (2)    | 4 (2)      | -10 (2)   | -3 (2)     |
| C13C | 75 (4)    | 36 (3)    | 41 (3)    | -3 (2)     | -21 (3)   | -13 (3)    |
| C14C | 70 (3)    | 53 (3)    | 57 (3)    | 3 (2)      | -21 (3)   | -33 (3)    |
| C15C | 53 (3)    | 59 (3)    | 67 (3)    | 6 (3)      | -3 (2)    | -27 (2)    |
| C16C | 47 (2)    | 45 (2)    | 53 (2)    | -3 (2)     | -1 (2)    | -16 (2)    |
| C20C | 49 (3)    | 20 (2)    | 34 (2)    | 1.4 (18)   | 9 (2)     | 4 (2)      |
| C21C | 59 (3)    | 20.3 (18) | 42 (2)    | -4.5 (15)  | 18.9 (19) | 1.6 (17)   |
| C22C | 56 (3)    | 20.4 (18) | 46 (2)    | -3.5 (16)  | 11.9 (19) | 5.2 (17)   |
| C23C | 87 (4)    | 29 (2)    | 50 (3)    | 7.0 (19)   | 22 (3)    | 9 (2)      |

|      |           |           |           |            |            |            |
|------|-----------|-----------|-----------|------------|------------|------------|
| C24C | 82 (4)    | 28 (2)    | 74 (3)    | 2 (2)      | 42 (3)     | 1 (2)      |
| C25C | 56 (3)    | 37 (2)    | 73 (3)    | -10 (2)    | 17 (2)     | -6 (2)     |
| C26C | 71 (3)    | 36 (2)    | 42 (2)    | -6.4 (19)  | 8 (2)      | 10 (2)     |
| N1   | 31.8 (16) | 20.2 (14) | 39.1 (17) | -5.7 (13)  | -4.3 (13)  | -0.7 (12)  |
| N16  | 35.1 (17) | 21.7 (15) | 38.9 (16) | -6.2 (13)  | -2.4 (13)  | 6.9 (13)   |
| C31  | 36 (2)    | 33 (2)    | 59 (3)    | -9.1 (19)  | -15.9 (19) | 3.4 (17)   |
| C32  | 33 (2)    | 42 (2)    | 81 (3)    | -15 (2)    | -8 (2)     | 6.1 (18)   |
| C33  | 33 (2)    | 54 (3)    | 81 (4)    | -15 (3)    | 8 (2)      | -4 (2)     |
| C34  | 37 (2)    | 43 (2)    | 56 (3)    | -4 (2)     | 11.1 (19)  | -3.3 (18)  |
| C35  | 35.2 (19) | 24.0 (18) | 45 (2)    | -5.1 (15)  | 5.1 (16)   | -5.5 (15)  |
| C36  | 45 (2)    | 25.7 (18) | 28.4 (17) | -2.1 (14)  | -2.1 (15)  | -1.8 (16)  |
| C37  | 39 (2)    | 23.7 (18) | 30.8 (17) | -6.9 (14)  | 4.0 (15)   | -2.2 (15)  |
| C38  | 39 (2)    | 21.1 (17) | 41 (2)    | -6.0 (15)  | -1.0 (16)  | 0.5 (15)   |
| C39  | 38 (2)    | 17.7 (16) | 42 (2)    | 2.6 (14)   | 4.9 (16)   | 0.7 (14)   |
| C40  | 41 (2)    | 26.9 (18) | 34.0 (18) | 3.2 (15)   | 3.2 (16)   | 8.6 (16)   |
| C41  | 49 (2)    | 31 (2)    | 50 (2)    | -10.7 (18) | -17.9 (19) | 13.2 (18)  |
| C42  | 40 (2)    | 34 (2)    | 87 (4)    | -20 (2)    | -19 (2)    | 7.6 (19)   |
| C43  | 38 (2)    | 34 (2)    | 98 (4)    | -14 (2)    | 2 (2)      | -5.7 (19)  |
| C44  | 38 (2)    | 30 (2)    | 63 (3)    | -7.0 (19)  | 10.3 (19)  | -1.4 (17)  |
| C45  | 33.6 (19) | 17.9 (16) | 37.6 (19) | -1.1 (14)  | 0.9 (15)   | 0.6 (14)   |
| N1A  | 39.0 (18) | 30.3 (17) | 38.5 (17) | -8.2 (14)  | 1.9 (14)   | 1.7 (13)   |
| N16A | 42.7 (18) | 30.0 (17) | 36.1 (17) | -2.7 (14)  | 0.1 (14)   | -2.5 (14)  |
| C31A | 39 (2)    | 55 (3)    | 54 (3)    | -15 (2)    | 13.6 (19)  | -5 (2)     |
| C32A | 40 (2)    | 51 (3)    | 82 (4)    | -19 (3)    | 5 (2)      | -2 (2)     |
| C33A | 40 (3)    | 60 (3)    | 97 (4)    | -18 (3)    | -16 (3)    | 8 (2)      |
| C34A | 47 (3)    | 55 (3)    | 66 (3)    | -5 (3)     | -12 (2)    | 10 (2)     |
| C35A | 42 (2)    | 30 (2)    | 66 (3)    | -10.3 (19) | -10 (2)    | 9.2 (17)   |
| C36A | 43 (2)    | 43 (2)    | 32.8 (19) | -8.6 (17)  | 3.1 (16)   | 3.3 (18)   |
| C37A | 45 (2)    | 38 (2)    | 34.2 (19) | -10.0 (17) | -0.9 (16)  | -0.2 (18)  |
| C38A | 40 (2)    | 37 (2)    | 56 (3)    | -15.8 (19) | 2.4 (19)   | -2.7 (18)  |
| C39A | 48 (2)    | 22.8 (19) | 60 (3)    | 7.0 (18)   | -6 (2)     | 4.4 (16)   |
| C40A | 55 (3)    | 27.9 (19) | 38 (2)    | 8.4 (16)   | -13.0 (18) | -10.8 (18) |
| C41A | 41 (2)    | 25.8 (18) | 35.8 (19) | -1.1 (15)  | -0.2 (16)  | -0.2 (15)  |
| C42A | 49 (2)    | 37 (2)    | 50 (2)    | -2.0 (19)  | -4.7 (19)  | -2.8 (19)  |
| C43A | 50 (3)    | 35 (2)    | 76 (3)    | -6 (2)     | 5 (2)      | 11 (2)     |
| C44A | 45 (3)    | 37 (2)    | 74 (3)    | -12 (2)    | 20 (2)     | -2.0 (19)  |
| C45A | 56 (3)    | 30 (2)    | 52 (2)    | -10.5 (18) | 16 (2)     | -14.0 (19) |



**Bond Lengths for compound 3.**

| Atom | Atom | Length/Å  | Atom | Atom | Length/Å   |
|------|------|-----------|------|------|------------|
| B1   | O11  | 1.503 (5) | C22D | C23D | 1.37 (3)   |
| B1   | O12  | 1.448 (5) | C23B | C24B | 1.409 (16) |
| B1   | O21  | 1.473 (5) | C23D | C24D | 1.38 (3)   |
| B1   | O22  | 1.437 (5) | C24B | C25B | 1.365 (14) |
| O10  | C10  | 1.219 (5) | C24D | C25D | 1.30 (3)   |
| O11  | C10  | 1.315 (5) | C25B | C26B | 1.394 (11) |
| O12  | C12  | 1.352 (5) | C25D | C26D | 1.36 (3)   |
| O20  | C20  | 1.214 (5) | B4   | O11C | 1.503 (5)  |
| O21  | C20  | 1.327 (5) | B4   | O12C | 1.443 (7)  |
| O22  | C22  | 1.354 (5) | B4   | O12E | 1.61 (3)   |
| C10  | C11  | 1.482 (5) | B4   | O21C | 1.445 (6)  |
| C11  | C12  | 1.397 (5) | B4   | O21E | 1.20 (2)   |
| C11  | C16  | 1.389 (5) | B4   | O22C | 1.453 (6)  |
| C12  | C13  | 1.385 (5) | B4   | O22E | 1.67 (4)   |
| C13  | C14  | 1.385 (6) | O10C | C10C | 1.221 (5)  |
| C14  | C15  | 1.382 (6) | O11C | C10C | 1.320 (5)  |
| C15  | C16  | 1.379 (6) | O12C | C12C | 1.357 (7)  |
| C20  | C21  | 1.465 (6) | O12E | C12E | 1.37 (6)   |
| C21  | C22  | 1.395 (5) | O20C | C20C | 1.212 (7)  |
| C21  | C26  | 1.391 (6) | O20E | C10H | 1.15 (5)   |
| C22  | C23  | 1.379 (6) | O21C | C20C | 1.337 (7)  |
| C23  | C24  | 1.388 (6) | O21E | C10H | 1.32 (4)   |
| C24  | C25  | 1.378 (8) | O22C | C22C | 1.365 (6)  |
| C25  | C26  | 1.367 (8) | O22E | C21C | 1.55 (3)   |
| B2   | O11A | 1.506 (5) | C10C | C11C | 1.479 (5)  |
| B2   | O12A | 1.440 (6) | C10H | C22C | 1.57 (3)   |
| B2   | O21A | 1.475 (6) | C11C | C12C | 1.379 (6)  |
| B2   | O22A | 1.433 (5) | C11C | C12E | 1.47 (5)   |
| O10A | C10A | 1.215 (5) | C11C | C16C | 1.388 (6)  |
| O11A | C10A | 1.318 (5) | C12C | C13C | 1.398 (7)  |
| O12A | C12A | 1.351 (5) | C12E | C13E | 1.45 (7)   |
| O20A | C20A | 1.200 (6) | C13C | C14C | 1.372 (9)  |
| O21A | C20A | 1.338 (6) | C13E | C14C | 1.53 (5)   |
| O22A | C22A | 1.355 (5) | C14C | C15C | 1.383 (8)  |
| C10A | C11A | 1.474 (6) | C15C | C16C | 1.386 (7)  |
| C11A | C12A | 1.392 (6) | C20C | C21C | 1.484 (6)  |
| C11A | C16A | 1.396 (6) | C21C | C22C | 1.382 (6)  |
| C12A | C13A | 1.383 (6) | C21C | C26C | 1.395 (7)  |
| C13A | C14A | 1.385 (7) | C22C | C23C | 1.391 (7)  |
| C14A | C15A | 1.384 (7) | C23C | C24C | 1.366 (8)  |

|           |            |           |           |
|-----------|------------|-----------|-----------|
| C15A C16A | 1.377 (7)  | C24C C25C | 1.373 (8) |
| C20A C21A | 1.461 (6)  | C25C C26C | 1.379 (7) |
| C21A C22A | 1.392 (5)  | N1 C31    | 1.512 (5) |
| C21A C26A | 1.386 (6)  | N1 C35    | 1.504 (5) |
| C22A C23A | 1.388 (5)  | N1 C36    | 1.500 (5) |
| C23A C24A | 1.386 (6)  | N16 C40   | 1.492 (5) |
| C24A C25A | 1.365 (8)  | N16 C41   | 1.501 (5) |
| C25A C26A | 1.374 (8)  | N16 C45   | 1.516 (5) |
| B3 O11B   | 1.506 (5)  | C31 C32   | 1.518 (7) |
| B3 O12B   | 1.434 (7)  | C32 C33   | 1.509 (8) |
| B3 O12D   | 1.577 (10) | C33 C34   | 1.540 (7) |
| B3 O21B   | 1.395 (7)  | C34 C35   | 1.523 (6) |
| B3 O21D   | 1.314 (10) | C35 C39   | 1.534 (6) |
| B3 O22B   | 1.487 (7)  | C36 C37   | 1.526 (5) |
| B3 O22D   | 1.576 (12) | C37 C38   | 1.515 (5) |
| O10B C10B | 1.226 (5)  | C37 C45   | 1.546 (5) |
| O11B C10B | 1.312 (5)  | C38 C39   | 1.538 (5) |
| O12B C12B | 1.360 (8)  | C39 C40   | 1.551 (5) |
| O12DC12D  | 1.350 (17) | C41 C42   | 1.500 (7) |
| O20B C20B | 1.219 (7)  | C42 C43   | 1.528 (8) |
| O20DC20D  | 1.209 (18) | C43 C44   | 1.523 (7) |
| O21B C20B | 1.319 (8)  | C44 C45   | 1.522 (5) |
| O21DC20D  | 1.340 (16) | N1A C31A  | 1.511 (6) |
| O22B C22B | 1.368 (9)  | N1A C35A  | 1.496 (6) |
| O22DC22D  | 1.40 (3)   | N1A C36A  | 1.492 (5) |
| C10B C11B | 1.477 (5)  | N16A C40A | 1.481 (5) |
| C11B C12B | 1.351 (7)  | N16A C41A | 1.511 (5) |
| C11B C12D | 1.492 (15) | N16A C45A | 1.501 (5) |
| C11B C16B | 1.374 (6)  | C31A C32A | 1.510 (7) |
| C12B C13B | 1.404 (9)  | C32A C33A | 1.519 (9) |
| C12D C13D | 1.42 (2)   | C33A C34A | 1.533 (8) |
| C13B C14B | 1.364 (10) | C34A C35A | 1.535 (7) |
| C13D C14B | 1.460 (17) | C35A C39A | 1.549 (7) |
| C14B C15B | 1.380 (8)  | C36A C37A | 1.526 (6) |
| C15B C16B | 1.387 (7)  | C37A C38A | 1.506 (7) |
| C20B C21B | 1.473 (9)  | C37A C41A | 1.548 (5) |
| C20D C21D | 1.47 (2)   | C38A C39A | 1.534 (7) |
| C21B C22B | 1.388 (12) | C39A C40A | 1.565 (6) |
| C21B C26B | 1.370 (14) | C41A C42A | 1.516 (6) |
| C21D C22D | 1.36 (3)   | C42A C43A | 1.519 (7) |
| C21D C26D | 1.39 (3)   | C43A C44A | 1.517 (8) |
| C22B C23B | 1.431 (13) | C44A C45A | 1.499 (7) |

**Bond Angles for compound 3.**

| Atom   | Atom | Atom | Angle/°   | Atom | Atom | Atom | Angle/°    |
|--------|------|------|-----------|------|------|------|------------|
| O12    | B1   | O11  | 111.5 (3) | C21D | C22D | C23D | 125 (2)    |
| O12    | B1   | O21  | 109.2 (3) | C23D | C22D | O22D | 114 (3)    |
| O21    | B1   | O11  | 106.7 (3) | C24B | C23B | C22B | 117.0 (9)  |
| O22    | B1   | O11  | 106.5 (3) | C22D | C23D | C24D | 116 (3)    |
| O22    | B1   | O12  | 108.1 (3) | C25B | C24B | C23B | 121.7 (7)  |
| O22    | B1   | O21  | 114.9 (3) | C25D | C24D | C23D | 123 (2)    |
| C10    | O11  | B1   | 121.4 (3) | C24B | C25B | C26B | 119.6 (8)  |
| C12    | O12  | B1   | 117.2 (3) | C24D | C25D | C26D | 119 (3)    |
| C20    | O21  | B1   | 124.6 (3) | C21B | C26B | C25B | 121.5 (8)  |
| C22    | O22  | B1   | 120.3 (3) | C25D | C26D | C21D | 123 (3)    |
| O10    | C10  | O11  | 121.3 (3) | O11C | B4   | O12E | 115.5 (11) |
| O10    | C10  | C11  | 121.7 (3) | O11C | B4   | O22E | 107.0 (11) |
| O11    | C10  | C11  | 116.9 (3) | O12C | B4   | O11C | 111.7 (4)  |
| C12    | C11  | C10  | 119.3 (3) | O12C | B4   | O21C | 109.5 (4)  |
| C16    | C11  | C10  | 120.7 (3) | O12C | B4   | O22C | 107.7 (4)  |
| C16    | C11  | C12  | 119.9 (3) | O12E | B4   | O22E | 89.3 (16)  |
| O12    | C12  | C11  | 120.8 (3) | O21C | B4   | O11C | 107.1 (4)  |
| O12    | C12  | C13  | 119.4 (3) | O21C | B4   | O22C | 114.6 (4)  |
| C13    | C12  | C11  | 119.7 (4) | O21E | B4   | O11C | 114.6 (13) |
| C12    | C13  | C14  | 119.6 (4) | O21E | B4   | O12E | 111.1 (18) |
| C15    | C14  | C13  | 120.8 (4) | O21E | B4   | O22E | 116.8 (17) |
| C16    | C15  | C14  | 119.8 (4) | O22C | B4   | O11C | 106.4 (4)  |
| C15    | C16  | C11  | 120.2 (4) | C10C | O11C | B4   | 122.4 (3)  |
| O20    | C20  | O21  | 120.2 (4) | C12C | O12C | B4   | 118.0 (4)  |
| O20    | C20  | C21  | 123.6 (4) | C12E | O12E | B4   | 106 (3)    |
| O21    | C20  | C21  | 116.2 (3) | C20C | O21C | B4   | 122.1 (4)  |
| C22    | C21  | C20  | 120.8 (4) | B4   | O21E | C10H | 125 (3)    |
| C26    | C21  | C20  | 120.4 (4) | C22C | O22C | B4   | 116.8 (4)  |
| C26    | C21  | C22  | 118.7 (4) | C21C | O22E | B4   | 116 (2)    |
| O22    | C22  | C21  | 121.4 (3) | O10C | C10C | O11C | 120.5 (3)  |
| O22    | C22  | C23  | 118.0 (3) | O10C | C10C | C11C | 122.7 (4)  |
| C23    | C22  | C21  | 120.6 (4) | O11C | C10C | C11C | 116.8 (3)  |
| C22    | C23  | C24  | 119.3 (4) | O20E | C10H | O21E | 128 (3)    |
| C25    | C24  | C23  | 120.7 (4) | O20E | C10H | C22C | 131 (3)    |
| C26    | C25  | C24  | 119.7 (4) | O21E | C10H | C22C | 101 (3)    |
| C25    | C26  | C21  | 121.1 (5) | C12C | C11C | C10C | 119.6 (4)  |
| O12AB2 | O11A |      | 111.5 (4) | C12C | C11C | C16C | 120.3 (4)  |
| O12AB2 | O21A |      | 109.7 (4) | C12E | C11C | C10C | 119.3 (19) |

|                |      |           |                |            |
|----------------|------|-----------|----------------|------------|
| O21AB2         | O11A | 106.1 (4) | C16C C11C C10C | 120.0 (4)  |
| O22AB2         | O11A | 107.1 (3) | C16C C11C C12E | 117 (2)    |
| O22AB2         | O12A | 107.8 (4) | O12C C12C C11C | 121.8 (4)  |
| O22AB2         | O21A | 114.6 (4) | O12C C12C C13C | 118.9 (5)  |
| C10A O11AB2    |      | 121.2 (3) | C11C C12C C13C | 119.3 (5)  |
| C12A O12AB2    |      | 117.6 (3) | O12E C12E C11C | 124 (4)    |
| C20A O21AB2    |      | 124.3 (3) | O12E C12E C13E | 113 (4)    |
| C22A O22AB2    |      | 119.8 (3) | C13E C12E C11C | 122 (4)    |
| O10A C10A O11A |      | 121.6 (4) | C14C C13C C12C | 120.3 (5)  |
| O10A C10A C11A |      | 121.5 (4) | C12E C13E C14C | 110 (4)    |
| O11A C10A C11A |      | 116.8 (3) | C13C C14C C15C | 120.4 (4)  |
| C12A C11A C10A |      | 119.8 (3) | C15C C14C C13E | 118 (2)    |
| C12A C11A C16A |      | 119.3 (4) | C14C C15C C16C | 119.6 (5)  |
| C16A C11A C10A |      | 120.9 (4) | C15C C16C C11C | 120.0 (5)  |
| O12A C12A C11A |      | 120.7 (4) | O20C C20C O21C | 121.6 (4)  |
| O12A C12A C13A |      | 118.9 (4) | O20C C20C C21C | 124.0 (5)  |
| C13A C12A C11A |      | 120.4 (4) | O21C C20C C21C | 114.3 (4)  |
| C12A C13A C14A |      | 119.6 (4) | C22C C21C O22E | 92.9 (13)  |
| C15A C14A C13A |      | 120.3 (4) | C22C C21C C20C | 122.7 (5)  |
| C16A C15A C14A |      | 120.2 (4) | C22C C21C C26C | 119.4 (4)  |
| C15A C16A C11A |      | 120.1 (4) | C26C C21C O22E | 147.6 (14) |
| O20A C20A O21A |      | 120.4 (4) | C26C C21C C20C | 117.8 (4)  |
| O20A C20A C21A |      | 123.7 (5) | O22C C22C C21C | 119.4 (4)  |
| O21A C20A C21A |      | 115.7 (4) | O22C C22C C23C | 120.7 (4)  |
| C22A C21A C20A |      | 121.0 (4) | C21C C22C C10H | 148.8 (14) |
| C26A C21A C20A |      | 120.3 (4) | C21C C22C C23C | 119.9 (5)  |
| C26A C21A C22A |      | 118.7 (4) | C23C C22C C10H | 89.8 (14)  |
| O22A C22A C21A |      | 121.7 (3) | C24C C23C C22C | 120.2 (5)  |
| O22A C22A C23A |      | 117.7 (3) | C23C C24C C25C | 120.3 (5)  |
| C23A C22A C21A |      | 120.5 (4) | C24C C25C C26C | 120.4 (5)  |
| C24A C23A C22A |      | 119.1 (4) | C25C C26C C21C | 119.8 (5)  |
| C25A C24A C23A |      | 120.7 (4) | C35 N1 C31     | 111.2 (3)  |
| C24A C25A C26A |      | 120.2 (4) | C36 N1 C31     | 109.5 (3)  |
| C25A C26A C21A |      | 120.8 (4) | C36 N1 C35     | 113.1 (3)  |
| O11B B3        | O12D | 114.9 (5) | C40 N16 C41    | 112.2 (3)  |
| O11B B3        | O22D | 109.6 (5) | C40 N16 C45    | 111.3 (3)  |
| O12B B3        | O11B | 111.0 (4) | C41 N16 C45    | 111.1 (3)  |
| O12B B3        | O22B | 105.3 (4) | N1 C31 C32     | 111.4 (4)  |
| O21B B3        | O11B | 106.0 (4) | C33 C32 C31    | 111.8 (4)  |
| O21B B3        | O12B | 113.0 (4) | C32 C33 C34    | 110.1 (4)  |
| O21B B3        | O22B | 116.0 (4) | C35 C34 C33    | 110.6 (4)  |
| O21DB3         | O11B | 113.6 (5) | N1 C35 C34     | 109.7 (3)  |

|                |           |                |          |
|----------------|-----------|----------------|----------|
| O21DB3 O12D    | 108.8(6)  | N1 C35 C39     | 110.7(3) |
| O21DB3 O22D    | 113.5(7)  | C34 C35 C39    | 114.0(4) |
| O22B B3 O11B   | 105.3(4)  | N1 C36 C37     | 113.1(3) |
| O22DB3 O12D    | 95.2(6)   | C36 C37 C45    | 113.1(3) |
| C10B O11B B3   | 122.5(3)  | C38 C37 C36    | 109.3(3) |
| C12B O12B B3   | 117.8(4)  | C38 C37 C45    | 111.2(3) |
| C12D O12DB3    | 110.7(9)  | C37 C38 C39    | 107.1(3) |
| C20B O21B B3   | 123.1(4)  | C35 C39 C38    | 107.8(3) |
| B3 O21DC20D    | 121.3(10) | C35 C39 C40    | 114.2(3) |
| C22B O22B B3   | 114.0(6)  | C38 C39 C40    | 109.8(3) |
| C22D O22DB3    | 108.9(13) | N16 C40 C39    | 111.7(3) |
| O10B C10B O11B | 119.9(4)  | C42 C41 N16    | 110.7(4) |
| O10B C10B C11B | 122.9(4)  | C41 C42 C43    | 110.4(4) |
| O11B C10B C11B | 117.2(3)  | C44 C43 C42    | 110.3(4) |
| C10B C11B C12D | 119.9(6)  | C45 C44 C43    | 112.1(4) |
| C12B C11B C10B | 118.9(4)  | N16 C45 C37    | 110.3(3) |
| C12B C11B C16B | 119.7(4)  | N16 C45 C44    | 108.6(3) |
| C16B C11B C10B | 120.5(4)  | C44 C45 C37    | 112.0(3) |
| C16B C11B C12D | 116.9(6)  | C35A N1A C31A  | 110.6(4) |
| O12B C12B C13B | 118.8(6)  | C36A N1A C31A  | 109.7(3) |
| C11B C12B O12B | 122.2(5)  | C36A N1A C35A  | 113.0(3) |
| C11B C12B C13B | 119.0(6)  | C40A N16A C41A | 112.1(3) |
| O12DC12D C11B  | 121.9(11) | C40A N16A C45A | 111.7(3) |
| O12DC12D C13D  | 117.6(13) | C45A N16A C41A | 110.9(3) |
| C13D C12D C11B | 120.4(12) | C32A C31A N1A  | 111.6(4) |
| C14B C13B C12B | 121.5(6)  | C31A C32A C33A | 111.6(4) |
| C12D C13D C14B | 114.1(13) | C32A C33A C34A | 110.8(4) |
| C13B C14B C15B | 118.1(5)  | C33A C34A C35A | 110.3(5) |
| C15B C14B C13D | 120.0(7)  | N1A C35A C34A  | 110.3(4) |
| C14B C15B C16B | 119.8(5)  | N1A C35A C39A  | 110.8(3) |
| C11B C16B C15B | 120.6(5)  | C34A C35A C39A | 113.3(4) |
| O20B C20B O21B | 121.6(5)  | N1A C36A C37A  | 113.3(3) |
| O20B C20B C21B | 122.3(7)  | C36A C37A C41A | 113.7(3) |
| O21B C20B C21B | 116.0(7)  | C38A C37A C36A | 108.9(4) |
| O20DC20D O21D  | 121.0(11) | C38A C37A C41A | 111.1(3) |
| O20DC20D C21D  | 122.7(14) | C37A C38A C39A | 107.7(3) |
| O21DC20D C21D  | 116.3(14) | C35A C39A C40A | 114.7(4) |
| C22B C21B C20B | 120.3(10) | C38A C39A C35A | 107.2(4) |
| C26B C21B C20B | 120.3(9)  | C38A C39A C40A | 109.5(4) |
| C26B C21B C22B | 119.3(8)  | N16A C40A C39A | 111.4(3) |
| C22D C21D C20D | 121(2)    | N16A C41A C37A | 110.3(3) |
| C22D C21D C26D | 114(2)    | N16A C41A C42A | 108.9(3) |

|                |            |                |           |
|----------------|------------|----------------|-----------|
| C26D C21D C20D | 125 (2)    | C42A C41A C37A | 112.3 (3) |
| O22B C22B C21B | 121.5 (9)  | C41A C42A C43A | 111.8 (4) |
| O22B C22B C23B | 117.6 (10) | C44A C43A C42A | 110.2 (4) |
| C21B C22B C23B | 120.9 (9)  | C45A C44A C43A | 110.1 (4) |
| C21D C22D O22D | 120.9 (19) | C44A C45A N16A | 110.7 (4) |

**Hydrogen Bonds for compound 3.**

| <b>D</b> | <b>H</b> | <b>A</b>          | <b>d(D-H)/Å</b> | <b>d(H-A)/Å</b> | <b>d(D-A)/Å</b> | <b>D-H-A/°</b> |
|----------|----------|-------------------|-----------------|-----------------|-----------------|----------------|
| N1A      | H1A      | O10A              | 1.00 (5)        | 1.76 (5)        | 2.687 (4)       | 152 (4)        |
| N16      | H16      | O10C <sup>1</sup> | 0.88 (5)        | 1.94 (5)        | 2.777 (4)       | 159 (4)        |
| N1       | H1       | O10               | 0.91 (5)        | 1.84 (5)        | 2.700 (4)       | 158 (4)        |
| N16A     | H16A     | O10B <sup>2</sup> | 0.96 (6)        | 1.85 (6)        | 2.786 (4)       | 167 (5)        |

<sup>1</sup>1-X,-1/2+Y,1-Z; <sup>2</sup>1-X,1/2+Y,1-Z

### Torsion Angles for compound 3.

| A   | B   | C   | D   | Angle/°    | A    | B    | C    | D    | Angle/°    |
|-----|-----|-----|-----|------------|------|------|------|------|------------|
| B1  | O11 | C10 | O10 | 176.3 (4)  | C22B | C23B | C24B | C25B | 2.2 (11)   |
| B1  | O11 | C10 | C11 | -8.1 (5)   | C22D | C21D | C26D | C25D | 1 (4)      |
| B1  | O12 | C12 | C11 | 22.6 (5)   | C22D | C23D | C24D | C25D | -2 (4)     |
| B1  | O12 | C12 | C13 | -157.9 (3) | C23B | C24B | C25B | C26B | -0.9 (11)  |
| B1  | O21 | C20 | O20 | 176.1 (4)  | C23D | C24D | C25D | C26D | 1 (4)      |
| B1  | O21 | C20 | C21 | -5.0 (5)   | C24B | C25B | C26B | C21B | 0.0 (10)   |
| B1  | O22 | C22 | C21 | 8.8 (5)    | C24D | C25D | C26D | C21D | -1 (5)     |
| B1  | O22 | C22 | C23 | -172.3 (4) | C26B | C21B | C22B | O22B | 178.7 (6)  |
| O10 | C10 | C11 | C12 | 162.6 (3)  | C26B | C21B | C22B | C23B | 1.7 (10)   |
| O10 | C10 | C11 | C16 | -13.4 (5)  | C26D | C21D | C22D | O22D | 179.8 (19) |
| O11 | B1  | O12 | C12 | -40.8 (5)  | C26D | C21D | C22D | C23D | -2 (3)     |
| O11 | B1  | O21 | C20 | -104.1 (4) | B4   | O11C | C10C | O10C | 173.8 (4)  |
| O11 | B1  | O22 | C22 | 102.8 (4)  | B4   | O11C | C10C | C11C | -8.9 (5)   |
| O11 | C10 | C11 | C12 | -13.0 (5)  | B4   | O12C | C12C | C11C | 21.1 (8)   |
| O11 | C10 | C11 | C16 | 171.0 (3)  | B4   | O12C | C12C | C13C | -158.8 (5) |
| O12 | B1  | O11 | C10 | 34.2 (5)   | B4   | O12E | C12E | C11C | -37 (5)    |
| O12 | B1  | O21 | C20 | 135.3 (4)  | B4   | O12E | C12E | C13E | 156 (4)    |
| O12 | B1  | O22 | C22 | -137.3 (3) | B4   | O21C | C20C | O20C | 172.6 (4)  |
| O12 | C12 | C13 | C14 | 178.0 (3)  | B4   | O21C | C20C | C21C | -11.5 (6)  |
| O20 | C20 | C21 | C22 | 176.3 (4)  | B4   | O21E | C10H | O20E | -164 (3)   |
| O20 | C20 | C21 | C26 | -0.9 (6)   | B4   | O21E | C10H | C22C | 15 (4)     |
| O21 | B1  | O11 | C10 | -84.9 (4)  | B4   | O22C | C22C | C21C | 19.0 (5)   |
| O21 | B1  | O12 | C12 | 76.8 (4)   | B4   | O22C | C22C | C23C | -161.8 (4) |
| O21 | B1  | O22 | C22 | -15.1 (5)  | B4   | O22E | C21C | C22C | -19.2 (18) |
| O21 | C20 | C21 | C22 | -2.6 (5)   | B4   | O22E | C21C | C26C | 164.5 (8)  |
| O21 | C20 | C21 | C26 | -179.8 (4) | O10C | C10C | C11C | C12C | 168.3 (4)  |
| O22 | B1  | O11 | C10 | 151.9 (3)  | O10C | C10C | C11C | C12E | -165 (3)   |
| O22 | B1  | O12 | C12 | -157.5 (3) | O10C | C10C | C11C | C16C | -6.6 (6)   |
| O22 | B1  | O21 | C20 | 13.7 (6)   | O11C | B4   | O12C | C12C | -35.8 (6)  |
| O22 | C22 | C23 | C24 | -179.4 (4) | O11C | B4   | O12E | C12E | 43 (3)     |
| C10 | C11 | C12 | O12 | 5.8 (5)    | O11C | B4   | O21C | C20C | -84.4 (5)  |
| C10 | C11 | C12 | C13 | -173.8 (3) | O11C | B4   | O21E | C10H | 81 (3)     |
| C10 | C11 | C16 | C15 | 175.8 (3)  | O11C | B4   | O22C | C22C | 81.8 (5)   |
| C11 | C12 | C13 | C14 | -2.5 (5)   | O11C | B4   | O22E | C21C | -79.3 (18) |
| C12 | C11 | C16 | C15 | -0.2 (5)   | O11C | C10C | C11C | C12C | -8.9 (6)   |
| C12 | C13 | C14 | C15 | 0.6 (6)    | O11C | C10C | C11C | C12E | 18 (3)     |
| C13 | C14 | C15 | C16 | 1.5 (6)    | O11C | C10C | C11C | C16C | 176.1 (4)  |
| C14 | C15 | C16 | C11 | -1.7 (6)   | O12C | B4   | O11C | C10C | 30.7 (5)   |
| C16 | C11 | C12 | O12 | -178.2 (3) | O12C | B4   | O21C | C20C | 154.4 (4)  |
| C16 | C11 | C12 | C13 | 2.2 (5)    | O12C | B4   | O22C | C22C | -158.3 (4) |



|           |           |      |     |            |                     |             |
|-----------|-----------|------|-----|------------|---------------------|-------------|
| C20       | C21       | C22  | O22 | 0.7 (5)    | O12C C12C C13C C14C | 178.9 (5)   |
| C20       | C21       | C22  | C23 | -178.2 (4) | O12E B4 O11C C10C   | -22.4 (13)  |
| C20       | C21       | C26  | C25 | 179.6 (4)  | O12E B4 O21E C10H   | -146 (3)    |
| C21       | C22       | C23  | C24 | -0.5 (6)   | O12E B4 O22E C21C   | 164 (2)     |
| C22       | C21       | C26  | C25 | 2.3 (7)    | O12E C12E C13E C14C | 180 (4)     |
| C22       | C23       | C24  | C25 | 0.6 (7)    | O20C C20C C21C C22C | 167.9 (4)   |
| C23       | C24       | C25  | C26 | 0.7 (7)    | O20C C20C C21C C26C | -8.0 (7)    |
| C24       | C25       | C26  | C21 | -2.2 (8)   | O20E C10H C22C C21C | -156 (3)    |
| C26       | C21       | C22  | O22 | 177.9 (4)  | O20E C10H C22C C23C | 7 (4)       |
| C26       | C21       | C22  | C23 | -1.0 (6)   | O21C B4 O11C C10C   | -89.1 (5)   |
| B2        | O11A C10A | O10A |     | 176.4 (4)  | O21C B4 O12C C12C   | 82.5 (5)    |
| B2        | O11A C10A | C11A |     | -8.6 (6)   | O21C B4 O22C C22C   | -36.3 (5)   |
| B2        | O12A C12A | C11A |     | 22.2 (5)   | O21C C20C C21C C22C | -7.8 (6)    |
| B2        | O12A C12A | C13A |     | -158.9 (4) | O21C C20C C21C C26C | 176.2 (4)   |
| B2        | O21A C20A | O20A |     | 176.8 (4)  | O21E B4 O11C C10C   | 108.9 (16)  |
| B2        | O21A C20A | C21A |     | -6.6 (6)   | O21E B4 O12E C12E   | -90 (3)     |
| B2        | O22A C22A | C21A |     | 11.5 (6)   | O21E B4 O22E C21C   | 51 (3)      |
| B2        | O22A C22A | C23A |     | -169.9 (4) | O21E C10H C22C C21C | 25 (4)      |
| O10A C10A | C11A      | C12A |     | 162.8 (4)  | O21E C10H C22C C23C | -171 (2)    |
| O10A C10A | C11A      | C16A |     | -13.6 (6)  | O22C B4 O11C C10C   | 147.9 (4)   |
| O11A B2   | O12A C12A |      |     | -40.1 (5)  | O22C B4 O12C C12C   | -152.3 (4)  |
| O11A B2   | O21A C20A |      |     | -100.2 (4) | O22C B4 O21C C20C   | 33.3 (6)    |
| O11A B2   | O22A C22A |      |     | 97.8 (4)   | O22C C22C C23C C24C | 179.6 (4)   |
| O11A C10A | C11A      | C12A |     | -12.3 (6)  | O22E B4 O11C C10C   | -120.0 (13) |
| O11A C10A | C11A      | C16A |     | 171.4 (4)  | O22E B4 O12E C12E   | 152 (3)     |
| O12A B2   | O11A C10A |      |     | 33.9 (6)   | O22E B4 O21E C10H   | -46 (3)     |
| O12A B2   | O21A C20A |      |     | 139.3 (4)  | O22E C21C C22C C10H | -17 (3)     |
| O12A B2   | O22A C22A |      |     | -142.1 (4) | O22E C21C C22C C23C | -177.4 (12) |
| O12A C12A | C13A      | C14A |     | 178.0 (4)  | O22E C21C C26C C25C | 176 (2)     |
| O20A C20A | C21A      | C22A |     | 173.3 (4)  | C10C C11C C12C O12C | 2.9 (8)     |
| O20A C20A | C21A      | C26A |     | -4.5 (7)   | C10C C11C C12C C13C | -177.2 (5)  |
| O21A B2   | O11A C10A |      |     | -85.5 (5)  | C10C C11C C12E O12E | 9 (6)       |
| O21A B2   | O12A C12A |      |     | 77.2 (4)   | C10C C11C C12E C13E | 175 (4)     |
| O21A B2   | O22A C22A |      |     | -19.6 (6)  | C10C C11C C16C C15C | 178.0 (4)   |
| O21A C20A | C21A      | C22A |     | -3.2 (6)   | C10H C22C C23C C24C | -171.3 (13) |
| O21A C20A | C21A      | C26A |     | 179.1 (4)  | C11C C12C C13C C14C | -1.0 (9)    |
| O22A B2   | O11A C10A |      |     | 151.6 (4)  | C11C C12E C13E C14C | 12 (7)      |
| O22A B2   | O12A C12A |      |     | -157.4 (3) | C12C C11C C16C C15C | 3.1 (7)     |
| O22A B2   | O21A C20A |      |     | 17.8 (6)   | C12C C13C C14C C15C | 3.5 (9)     |
| O22A C22A | C23A      | C24A |     | -178.9 (4) | C12E C11C C16C C15C | -24 (3)     |
| C10A C11A | C12A      | O12A |     | 5.6 (5)    | C12E C13E C14C C15C | -37 (5)     |
| C10A C11A | C12A      | C13A |     | -173.3 (4) | C13C C14C C15C C16C | -2.7 (9)    |

|                     |             |                     |            |
|---------------------|-------------|---------------------|------------|
| C10A C11A C16A C15A | 175.8 (4)   | C13E C14C C15C C16C | 33 (3)     |
| C11A C12A C13A C14A | -3.1 (6)    | C14C C15C C16C C11C | -0.6 (8)   |
| C12A C11A C16A C15A | -0.6 (6)    | C16C C11C C12C O12C | 177.8 (5)  |
| C12A C13A C14A C15A | 0.5 (6)     | C16C C11C C12C C13C | -2.3 (8)   |
| C13A C14A C15A C16A | 2.0 (6)     | C16C C11C C12E O12E | -150 (4)   |
| C14A C15A C16A C11A | -2.0 (6)    | C16C C11C C12E C13E | 16 (6)     |
| C16A C11A C12A O12A | -178.0 (4)  | C20C C21C C22C O22C | 3.6 (6)    |
| C16A C11A C12A C13A | 3.1 (6)     | C20C C21C C22C C23C | -175.6 (4) |
| C20A C21A C22A O22A | 0.7 (6)     | C20C C21C C26C C25C | 176.5 (4)  |
| C20A C21A C22A C23A | -177.8 (4)  | C21C C22C C23C C24C | -1.1 (7)   |
| C20A C21A C26A C25A | 178.5 (5)   | C22C C21C C26C C25C | 0.4 (6)    |
| C21A C22A C23A C24A | -0.3 (6)    | C22C C23C C24C C25C | 1.3 (7)    |
| C22A C21A C26A C25A | 0.7 (7)     | C23C C24C C25C C26C | -0.7 (7)   |
| C22A C23A C24A C25A | 0.0 (7)     | C24C C25C C26C C21C | -0.2 (7)   |
| C23A C24A C25A C26A | 0.6 (8)     | C26C C21C C22C O22C | 179.5 (4)  |
| C24A C25A C26A C21A | -1.0 (8)    | C26C C21C C22C C10H | 161 (2)    |
| C26A C21A C22A O22A | 178.5 (4)   | C26C C21C C22C C23C | 0.2 (6)    |
| C26A C21A C22A C23A | -0.1 (6)    | N1 C31 C32 C33      | -54.6 (5)  |
| B3 O11B C10B O10B   | 177.9 (4)   | N1 C35 C39 C38      | -60.2 (4)  |
| B3 O11B C10B C11B   | -2.7 (5)    | N1 C35 C39 C40      | 62.2 (4)   |
| B3 O12B C12B C11B   | 23.5 (9)    | N1 C36 C37 C38      | 54.7 (4)   |
| B3 O12B C12B C13B   | -155.5 (6)  | N1 C36 C37 C45      | -69.9 (4)  |
| B3 O12DC12D C11B    | -30.0 (16)  | N16 C41 C42 C43     | 57.8 (5)   |
| B3 O12DC12D C13D    | 154.7 (13)  | C31 N1 C35 C34      | -58.3 (4)  |
| B3 O21B C20B O20B   | 175.1 (5)   | C31 N1 C35 C39      | 175.0 (3)  |
| B3 O21B C20B C21B   | -8.6 (7)    | C31 N1 C36 C37      | -173.2 (3) |
| B3 O21DC20D O20D    | -165.8 (10) | C31 C32 C33 C34     | 54.7 (6)   |
| B3 O21DC20D C21D    | 16.1 (17)   | C32 C33 C34 C35     | -57.0 (5)  |
| B3 O22B C22B C21B   | 19.3 (8)    | C33 C34 C35 N1      | 58.8 (5)   |
| B3 O22B C22B C23B   | -163.6 (6)  | C33 C34 C35 C39     | -176.5 (4) |
| B3 O22DC22D C21D    | -27 (2)     | C34 C35 C39 C38     | 175.6 (3)  |
| B3 O22DC22D C23D    | 154.5 (17)  | C34 C35 C39 C40     | -62.0 (4)  |
| O10B C10B C11B C12B | 165.6 (5)   | C35 N1 C31 C32      | 56.3 (4)   |
| O10B C10B C11B C12D | -164.7 (8)  | C35 N1 C36 C37      | -48.6 (4)  |
| O10B C10B C11B C16B | -3.8 (6)    | C35 C39 C40 N16     | -120.8 (3) |
| O11B B3 O12B C12B   | -36.8 (7)   | C36 N1 C31 C32      | -177.9 (3) |
| O11B B3 O12DC12D    | 40.9 (10)   | C36 N1 C35 C34      | 177.9 (3)  |
| O11B B3 O21B C20B   | -85.9 (5)   | C36 N1 C35 C39      | 51.3 (4)   |
| O11B B3 O21DC20D    | 81.6 (10)   | C36 C37 C38 C39     | -63.2 (4)  |
| O11B B3 O22B C22B   | 82.0 (5)    | C36 C37 C45 N16     | 116.5 (3)  |
| O11B B3 O22DC22D    | -79.4 (11)  | C36 C37 C45 C44     | -122.6 (4) |
| O11B C10B C11B C12B | -13.8 (6)   | C37 C38 C39 C35     | 66.4 (4)   |

|                     |             |      |      |      |      |            |
|---------------------|-------------|------|------|------|------|------------|
| O11B C10B C11B C12D | 15.9 (9)    | C37  | C38  | C39  | C40  | -58.7 (4)  |
| O11B C10B C11B C16B | 176.8 (4)   | C38  | C37  | C45  | N16  | -7.0 (4)   |
| O12B B3 O11B C10B   | 27.1 (6)    | C38  | C37  | C45  | C44  | 114.0 (4)  |
| O12B B3 O21B C20B   | 152.3 (5)   | C38  | C39  | C40  | N16  | 0.5 (4)    |
| O12B B3 O22B C22B   | -160.5 (5)  | C40  | N16  | C41  | C42  | 174.5 (3)  |
| O12B C12B C13B C14B | 177.4 (6)   | C40  | N16  | C45  | C37  | -52.9 (4)  |
| O12DB3 O11B C10B    | -25.6 (7)   | C40  | N16  | C45  | C44  | -175.9 (3) |
| O12DB3 O21DC20D     | -149.1 (9)  | C41  | N16  | C40  | C39  | -178.4 (3) |
| O12DB3 O22DC22D     | 161.8 (10)  | C41  | N16  | C45  | C37  | -178.6 (3) |
| O12DC12D C13D C14B  | -178.0 (12) | C41  | N16  | C45  | C44  | 58.4 (4)   |
| O20B C20B C21B C22B | 167.6 (6)   | C41  | C42  | C43  | C44  | -55.2 (5)  |
| O20B C20B C21B C26B | -9.1 (9)    | C42  | C43  | C44  | C45  | 55.5 (5)   |
| O20DC20D C21D C22D  | -170.1 (16) | C43  | C44  | C45  | N16  | -56.5 (4)  |
| O20DC20D C21D C26D  | 12 (3)      | C43  | C44  | C45  | C37  | -178.5 (4) |
| O21B B3 O11B C10B   | -95.9 (5)   | C45  | N16  | C40  | C39  | 56.4 (4)   |
| O21B B3 O12B C12B   | 82.2 (6)    | C45  | N16  | C41  | C42  | -60.2 (4)  |
| O21B B3 O22B C22B   | -34.9 (6)   | C45  | C37  | C38  | C39  | 62.5 (4)   |
| O21B C20B C21B C22B | -8.7 (8)    | N1A  | C31A | C32A | C33A | -54.9 (6)  |
| O21B C20B C21B C26B | 174.6 (6)   | N1A  | C35A | C39A | C38A | -59.8 (4)  |
| O21DB3 O11B C10B    | 100.5 (6)   | N1A  | C35A | C39A | C40A | 62.0 (5)   |
| O21DB3 O12DC12D     | -87.7 (10)  | N1A  | C36A | C37A | C38A | 55.2 (4)   |
| O21DB3 O22DC22D     | 48.8 (12)   | N1A  | C36A | C37A | C41A | -69.2 (5)  |
| O21DC20D C21D C22D  | 8 (2)       | N16A | C41A | C42A | C43A | -56.5 (5)  |
| O21DC20D C21D C26D  | -170 (2)    | C31A | N1A  | C35A | C34A | -58.8 (5)  |
| O22B B3 O11B C10B   | 140.6 (4)   | C31A | N1A  | C35A | C39A | 175.0 (4)  |
| O22B B3 O12B C12B   | -150.3 (5)  | C31A | N1A  | C36A | C37A | -173.2 (3) |
| O22B B3 O21B C20B   | 30.6 (7)    | C31A | C32A | C33A | C34A | 53.8 (6)   |
| O22B C22B C23B C24B | -179.7 (7)  | C32A | C33A | C34A | C35A | -55.2 (6)  |
| O22DB3 O11B C10B    | -131.4 (6)  | C33A | C34A | C35A | N1A  | 58.0 (5)   |
| O22DB3 O12DC12D     | 155.3 (9)   | C33A | C34A | C35A | C39A | -177.2 (4) |
| O22DB3 O21DC20D     | -44.5 (12)  | C34A | C35A | C39A | C38A | 175.7 (4)  |
| O22DC22D C23D C24D  | -179.5 (16) | C34A | C35A | C39A | C40A | -62.5 (5)  |
| C10B C11B C12B O12B | 3.5 (9)     | C35A | N1A  | C31A | C32A | 57.4 (5)   |
| C10B C11B C12B C13B | -177.5 (6)  | C35A | N1A  | C36A | C37A | -49.4 (5)  |
| C10B C11B C12D O12D | 3.0 (17)    | C35A | C39A | C40A | N16A | -119.6 (4) |
| C10B C11B C12D C13D | 178.1 (12)  | C36A | N1A  | C31A | C32A | -177.3 (4) |
| C10B C11B C16B C15B | 178.3 (5)   | C36A | N1A  | C35A | C34A | 177.9 (4)  |
| C11B C12B C13B C14B | -1.6 (11)   | C36A | N1A  | C35A | C39A | 51.6 (5)   |
| C11B C12D C13D C14B | 7 (2)       | C36A | C37A | C38A | C39A | -63.6 (4)  |
| C12B C11B C16B C15B | 9.1 (8)     | C36A | C37A | C41A | N16A | 116.3 (4)  |
| C12B C13B C14B C15B | 10.2 (11)   | C36A | C37A | C41A | C42A | -122.0 (4) |
| C12D C11B C16B C15B | -20.2 (10)  | C37A | C38A | C39A | C35A | 66.2 (4)   |

|                     |             |                     |            |
|---------------------|-------------|---------------------|------------|
| C12D C13D C14B C15B | -27.7 (18)  | C37A C38A C39A C40A | -58.8 (5)  |
| C13B C14B C15B C16B | -9.1 (9)    | C37A C41A C42A C43A | -179.0 (4) |
| C13D C14B C15B C16B | 25.7 (12)   | C38A C37A C41A N16A | -7.0 (5)   |
| C14B C15B C16B C11B | -0.3 (8)    | C38A C37A C41A C42A | 114.7 (4)  |
| C16B C11B C12B O12B | 172.9 (5)   | C38A C39A C40A N16A | 0.9 (5)    |
| C16B C11B C12B C13B | -8.1 (9)    | C40A N16A C41A C37A | -52.9 (4)  |
| C16B C11B C12D O12D | -158.6 (11) | C40A N16A C41A C42A | -176.6 (3) |
| C16B C11B C12D C13D | 16.5 (18)   | C40A N16A C45A C44A | 174.4 (4)  |
| C20B C21B C22B O22B | 2.0 (10)    | C41A N16A C40A C39A | 55.9 (4)   |
| C20B C21B C22B C23B | -175.0 (6)  | C41A N16A C45A C44A | -59.8 (5)  |
| C20B C21B C26B C25B | 176.3 (6)   | C41A C37A C38A C39A | 62.4 (5)   |
| C20D C21D C22D O22D | 1 (3)       | C41A C42A C43A C44A | 56.3 (5)   |
| C20D C21D C22D C23D | 179 (2)     | C42A C43A C44A C45A | -56.3 (5)  |
| C20D C21D C26D C25D | 180 (2)     | C43A C44A C45A N16A | 58.4 (5)   |
| C21B C22B C23B C24B | -2.6 (11)   | C45A N16A C40A C39A | -178.9 (3) |
| C21D C22D C23D C24D | 2 (3)       | C45A N16A C41A C37A | -178.5 (3) |
| C22B C21B C26B C25B | -0.4 (10)   | C45A N16A C41A C42A | 57.8 (4)   |

**Hydrogen Atom Coordinates ( $\text{\AA}\times 10^4$ ) and Isotropic Displacement Parameters ( $\text{\AA}^2\times 10^3$ ) for compound 3.**

| <b>Atom</b> | <b>x</b> | <b>y</b> | <b>z</b> | <b>U(eq)</b> |
|-------------|----------|----------|----------|--------------|
| H13         | -776     | 7373     | 7704     | 42           |
| H14         | -2489    | 7670     | 7188     | 44           |
| H15         | -3263    | 7054     | 6105     | 42           |
| H16D        | -2357    | 6105     | 5565     | 36           |
| H23         | 3532     | 5021     | 7808     | 45           |
| H24         | 5360     | 4992     | 7426     | 56           |
| H25         | 5963     | 5641     | 6319     | 69           |
| H26         | 4759     | 6343     | 5613     | 63           |
| H13A        | 4140     | 2565     | 7322     | 50           |
| H14E        | 2426     | 2300     | 7843     | 53           |
| H15A        | 1730     | 2923     | 8943     | 55           |
| H16E        | 2697     | 3850     | 9482     | 48           |
| H23A        | 8525     | 4849     | 7191     | 44           |
| H24A        | 10353    | 4902     | 7594     | 55           |
| H25A        | 10962    | 4293     | 8725     | 72           |
| H26A        | 9775     | 3605     | 9457     | 64           |
| H13B        | 1478     | 4874     | 2664     | 57           |
| H13D        | 1725     | 5283     | 2086     | 48           |
| H14B        | -98      | 5029     | 1891     | 69           |
| H14A        | -184     | 4867     | 2111     | 69           |
| H15B        | -625     | 4137     | 999      | 72           |
| H16B        | 635      | 3290     | 647      | 64           |
| H23B        | 6048     | 2672     | 3437     | 47           |
| H23D        | 6906     | 3895     | 1052     | 51           |
| H24B        | 7870     | 2464     | 3047     | 47           |
| H24D        | 8329     | 3190     | 1495     | 45           |
| H25B        | 8613     | 3015     | 1931     | 49           |
| H25D        | 8231     | 2567     | 2646     | 54           |
| H26B        | 7548     | 3761     | 1137     | 41           |
| H26D        | 6672     | 2587     | 3407     | 48           |
| H13C        | 6392     | 5109     | 2327     | 61           |
| H13E        | 6699     | 4677     | 2921     | 58           |
| H14C        | 4795     | 5016     | 3065     | 72           |
| H14D        | 4743     | 5200     | 2855     | 72           |
| H15C        | 4416     | 5801     | 4110     | 71           |
| H16C        | 5716     | 6626     | 4482     | 58           |
| H23C        | 11042    | 7258     | 1589     | 66           |
| H24C        | 12843    | 7441     | 1949     | 74           |
| H25C        | 13597    | 6881     | 3074     | 66           |

|      |       |      |       |    |
|------|-------|------|-------|----|
| H26C | 12539 | 6149 | 3869  | 60 |
| H31A | -2761 | 4020 | 3960  | 51 |
| H31B | -2253 | 4766 | 4132  | 51 |
| H32A | -2938 | 4772 | 5464  | 62 |
| H32B | -3921 | 4611 | 4843  | 62 |
| H33A | -3847 | 3439 | 5161  | 68 |
| H33B | -3945 | 3863 | 6001  | 68 |
| H34A | -2044 | 3754 | 6243  | 54 |
| H34B | -2552 | 3001 | 6118  | 54 |
| H35  | -2011 | 3011 | 4726  | 42 |
| H36A | -386  | 4375 | 3818  | 40 |
| H36B | -974  | 3676 | 3542  | 40 |
| H37  | 831   | 3416 | 3729  | 37 |
| H38A | 733   | 2530 | 4715  | 41 |
| H38B | -376  | 2558 | 4187  | 41 |
| H39  | -751  | 2501 | 5632  | 39 |
| H40A | -214  | 3804 | 6126  | 41 |
| H40B | 233   | 3097 | 6506  | 41 |
| H41A | 1647  | 4354 | 6361  | 52 |
| H41B | 1990  | 3639 | 6779  | 52 |
| H42A | 3425  | 3513 | 5854  | 65 |
| H42B | 3542  | 4236 | 6323  | 65 |
| H43A | 2809  | 4830 | 5186  | 68 |
| H43B | 3808  | 4370 | 4874  | 68 |
| H44A | 2268  | 4249 | 3985  | 52 |
| H44B | 2614  | 3523 | 4374  | 52 |
| H45  | 854   | 4362 | 4947  | 36 |
| H31C | 2842  | 5198 | 10875 | 59 |
| H31D | 2328  | 5948 | 11001 | 59 |
| H32C | 1165  | 5315 | 10156 | 69 |
| H32D | 2139  | 5136 | 9545  | 69 |
| H33C | 1203  | 6473 | 9771  | 79 |
| H33D | 1115  | 6019 | 8951  | 79 |
| H34C | 2467  | 6906 | 8819  | 67 |
| H34D | 2991  | 6156 | 8705  | 67 |
| H35A | 3052  | 6925 | 10211 | 55 |
| H36C | 4709  | 5600 | 11164 | 48 |
| H36D | 4123  | 6306 | 11405 | 48 |
| H37A | 5925  | 6560 | 11209 | 47 |
| H38C | 5794  | 7417 | 10197 | 53 |
| H38D | 4697  | 7395 | 10725 | 53 |
| H39A | 4288  | 7425 | 9283  | 52 |

|      |            |           |           |         |
|------|------------|-----------|-----------|---------|
| H40C | 4843       | 6114      | 8813      | 48      |
| H40D | 5280       | 6817      | 8421      | 48      |
| H41C | 5928       | 5587      | 10019     | 41      |
| H42C | 7359       | 5718      | 10975     | 54      |
| H42D | 7700       | 6434      | 10563     | 54      |
| H43C | 8867       | 5567      | 10087     | 65      |
| H43D | 7850       | 5113      | 9784      | 65      |
| H44C | 8467       | 6417      | 9100      | 62      |
| H44D | 8583       | 5688      | 8644      | 62      |
| H45A | 6685       | 5563      | 8609      | 55      |
| H45B | 7018       | 6270      | 8169      | 55      |
| H1A  | 4040 (40)  | 5620 (30) | 9880 (30) | 43 (13) |
| H16  | 1550 (40)  | 3110 (30) | 5540 (30) | 36 (12) |
| H1   | -1130 (30) | 4290 (20) | 5080 (30) | 24 (10) |
| H16A | 6670 (40)  | 6850 (30) | 9360 (30) | 49 (14) |

**Atomic Occupancy for compound 3.**

| <b>Atom</b> | <b>Occupancy</b> | <b>Atom</b> | <b>Occupancy</b> | <b>Atom</b> | <b>Occupancy</b> |
|-------------|------------------|-------------|------------------|-------------|------------------|
| O12B        | 0.7              | O12D        | 0.3              | O20B        | 0.7              |
| O20D        | 0.3              | O21B        | 0.7              | O21D        | 0.3              |
| O22B        | 0.7              | O22D        | 0.3              | C12B        | 0.7              |
| C12D        | 0.3              | C13B        | 0.7              | H13B        | 0.7              |
| C13D        | 0.3              | H13D        | 0.3              | H14B        | 0.7              |
| H14A        | 0.3              | C20B        | 0.7              | C20D        | 0.3              |
| C21B        | 0.7              | C21D        | 0.3              | C22B        | 0.7              |
| C22D        | 0.3              | C23B        | 0.7              | H23B        | 0.7              |
| C23D        | 0.3              | H23D        | 0.3              | C24B        | 0.7              |
| H24B        | 0.7              | C24D        | 0.3              | H24D        | 0.3              |
| C25B        | 0.7              | H25B        | 0.7              | C25D        | 0.3              |
| H25D        | 0.3              | C26B        | 0.7              | H26B        | 0.7              |
| C26D        | 0.3              | H26D        | 0.3              | O12C        | 0.9              |
| O12E        | 0.1              | O20C        | 0.85             | O20E        | 0.15             |
| O21C        | 0.85             | O21E        | 0.15             | O22C        | 0.85             |
| O22E        | 0.15             | C10H        | 0.15             | C12C        | 0.9              |
| C12E        | 0.1              | C13C        | 0.9              | H13C        | 0.9              |
| C13E        | 0.1              | H13E        | 0.1              | H14C        | 0.9              |
| H14D        | 0.1              | C20C        | 0.85             |             |                  |



**Table 5 Crystal data and structure refinement for compound 4.**

|                                             |                                                               |
|---------------------------------------------|---------------------------------------------------------------|
| Identification code                         | lawr111b                                                      |
| Empirical formula                           | C <sub>30</sub> H <sub>44</sub> BNO <sub>6</sub>              |
| Formula weight                              | 525.47                                                        |
| Temperature/K                               | 100.00(10)                                                    |
| Crystal system                              | monoclinic                                                    |
| Space group                                 | P2 <sub>1</sub>                                               |
| a/Å                                         | 9.49961(15)                                                   |
| b/Å                                         | 13.42524(18)                                                  |
| c/Å                                         | 12.0837(2)                                                    |
| α/°                                         | 90                                                            |
| β/°                                         | 110.1708(19)                                                  |
| γ/°                                         | 90                                                            |
| Volume/Å <sup>3</sup>                       | 1446.58(4)                                                    |
| Z                                           | 2                                                             |
| ρ <sub>calc</sub> /g/cm <sup>3</sup>        | 1.206                                                         |
| μ/mm <sup>-1</sup>                          | 0.659                                                         |
| F(000)                                      | 568.0                                                         |
| Crystal size/mm <sup>3</sup>                | 0.03 × 0.02 × 0.02                                            |
| Radiation                                   | CuKα (λ = 1.54184)                                            |
| 2θ range for data collection/°              | 7.794 to 135                                                  |
| Index ranges                                | -11 ≤ h ≤ 11, -16 ≤ k ≤ 16, -14 ≤ l ≤ 14                      |
| Reflections collected                       | 21442                                                         |
| Independent reflections                     | 5215 [R <sub>int</sub> = 0.0393, R <sub>sigma</sub> = 0.0330] |
| Data/restraints/parameters                  | 5215/1/347                                                    |
| Goodness-of-fit on F <sup>2</sup>           | 1.036                                                         |
| Final R indexes [I ≥ 2σ (I)]                | R <sub>1</sub> = 0.0281, wR <sub>2</sub> = 0.0640             |
| Final R indexes [all data]                  | R <sub>1</sub> = 0.0309, wR <sub>2</sub> = 0.0652             |
| Largest diff. peak/hole / e Å <sup>-3</sup> | 0.13/-0.15                                                    |
| Flack parameter                             | -0.03(7)                                                      |

**Fractional Atomic Coordinates ( $\times 10^4$ ) and Equivalent Isotropic Displacement Parameters ( $\text{\AA}^2 \times 10^3$ ) for compound 4.  $U_{\text{eq}}$  is defined as 1/3 of the trace of the orthogonalised  $U_{\text{IJ}}$  tensor.**

| Atom | <i>x</i>    | <i>y</i>    | <i>z</i>    | $U(\text{eq})$ |
|------|-------------|-------------|-------------|----------------|
| O20  | 2415.1 (16) | 4091.0 (11) | 5070.2 (13) | 22.2 (3)       |
| O21  | 2272.8 (15) | 4424.3 (10) | 3244.7 (12) | 18.7 (3)       |
| O22  | 3273.2 (15) | 3281.9 (10) | 2124.7 (12) | 19.0 (3)       |
| O30  | 4647.6 (16) | 6531.0 (11) | 2046.1 (14) | 25.9 (3)       |
| O31  | 3920.9 (14) | 5005.3 (10) | 2272.2 (12) | 18.1 (3)       |
| O32  | 1399.9 (14) | 4414.4 (10) | 1143.1 (12) | 19.0 (3)       |
| C20  | 2747 (2)    | 3873.2 (13) | 4212.9 (17) | 15.7 (4)       |
| C21  | 3646 (2)    | 2982.9 (13) | 4164.2 (18) | 15.2 (4)       |
| C22  | 3861 (2)    | 2735.5 (14) | 3106.7 (17) | 15.4 (4)       |
| C23  | 4683 (2)    | 1883.5 (15) | 3053.2 (18) | 18.7 (4)       |
| C24  | 5283 (2)    | 1288.8 (14) | 4040 (2)    | 20.8 (4)       |
| C25  | 5067 (2)    | 1527.2 (15) | 5092 (2)    | 21.5 (4)       |
| C26  | 4257 (2)    | 2369.4 (15) | 5149.6 (18) | 18.6 (4)       |
| C30  | 3663 (2)    | 5906.9 (15) | 1797.9 (17) | 17.1 (4)       |
| C31  | 2134 (2)    | 6091.3 (14) | 948.6 (17)  | 16.5 (4)       |
| C32  | 1087 (2)    | 5320.5 (14) | 648.6 (17)  | 16.0 (4)       |
| C33  | -334 (2)    | 5488.3 (16) | -193.1 (18) | 20.3 (4)       |
| C34  | -696 (2)    | 6415.1 (18) | -700.6 (18) | 24.9 (4)       |
| C35  | 336 (3)     | 7197.2 (16) | -395 (2)    | 26.3 (5)       |
| C36  | 1753 (2)    | 7027.8 (15) | 422.9 (18)  | 21.7 (4)       |
| B1   | 2714 (2)    | 4273.6 (16) | 2186.4 (19) | 17.0 (4)       |
| N1   | 9335.0 (17) | 7038.1 (12) | 3325.5 (15) | 16.0 (3)       |
| C1   | 9267 (2)    | 6938.0 (15) | 4559.3 (18) | 16.9 (4)       |
| C2   | 10613 (2)   | 6432.8 (15) | 5453.3 (18) | 18.6 (4)       |
| C3   | 10367 (2)   | 6327.4 (15) | 6627.3 (18) | 20.7 (4)       |
| C4   | 11696 (2)   | 5804.3 (15) | 7535.5 (19) | 22.3 (4)       |
| C5   | 7926 (2)    | 7604.0 (14) | 2598.2 (17) | 16.7 (4)       |
| C6   | 7836 (2)    | 7895.5 (17) | 1356.3 (19) | 23.7 (4)       |
| C7   | 6202 (2)    | 8088.2 (17) | 568.6 (19)  | 24.6 (4)       |
| C8   | 5459 (2)    | 8948.0 (18) | 971 (2)     | 32.5 (5)       |
| C9   | 10741 (2)   | 7580.8 (14) | 3341.6 (18) | 18.2 (4)       |
| C10  | 10911 (2)   | 8635.2 (14) | 3839 (2)    | 22.9 (4)       |
| C11  | 12532 (2)   | 8999.6 (15) | 4147.4 (19) | 21.7 (4)       |
| C12  | 13069 (3)   | 9029.4 (18) | 3104 (2)    | 30.6 (5)       |
| C13  | 9389 (2)    | 6013.9 (14) | 2801.0 (18) | 17.2 (4)       |
| C14  | 8220 (2)    | 5272.8 (14) | 2881.7 (19) | 19.2 (4)       |
| C15  | 8210 (2)    | 4360.8 (15) | 2126 (2)    | 23.5 (4)       |
| C16  | 7142 (2)    | 3558.6 (14) | 2247 (2)    | 23.6 (4)       |

**Anisotropic Displacement Parameters ( $\text{\AA}^2 \times 10^3$ ) for compound 4. The Anisotropic displacement factor exponent takes the form:  $-2\pi^2[h^2a^2U_{11}+2hka*b*U_{12}+\dots]$ .**

| Atom | $U_{11}$  | $U_{22}$  | $U_{33}$  | $U_{23}$ | $U_{13}$ | $U_{12}$ |
|------|-----------|-----------|-----------|----------|----------|----------|
| O20  | 28.3 (7)  | 19.5 (7)  | 22.7 (7)  | -0.6 (6) | 14.0 (6) | -0.5 (6) |
| O21  | 19.8 (6)  | 16.8 (6)  | 20.0 (7)  | 2.0 (5)  | 7.7 (5)  | 4.2 (5)  |
| O22  | 25.8 (7)  | 16.0 (6)  | 15.5 (7)  | 3.4 (5)  | 7.3 (6)  | 4.8 (5)  |
| O30  | 21.0 (7)  | 25.8 (8)  | 28.4 (8)  | 0.8 (6)  | 5.4 (6)  | -8.2 (6) |
| O31  | 13.7 (6)  | 19.4 (7)  | 19.2 (7)  | 2.7 (5)  | 3.2 (5)  | 0.6 (5)  |
| O32  | 17.4 (6)  | 15.9 (7)  | 20.3 (7)  | 2.9 (5)  | 2.0 (5)  | -2.8 (5) |
| C20  | 14.3 (8)  | 14.4 (9)  | 18.8 (10) | -0.5 (7) | 6.2 (7)  | -3.7 (7) |
| C21  | 12.8 (8)  | 13.4 (8)  | 18.8 (10) | 0.0 (7)  | 4.6 (7)  | -3.9 (6) |
| C22  | 13.2 (8)  | 15.4 (8)  | 17.2 (9)  | 1.6 (7)  | 4.6 (7)  | -3.3 (7) |
| C23  | 17.6 (8)  | 17.6 (9)  | 21.6 (10) | -1.8 (8) | 7.6 (7)  | -1.0 (7) |
| C24  | 15.7 (9)  | 14.3 (9)  | 30.5 (11) | 1.7 (8)  | 5.5 (8)  | 0.6 (7)  |
| C25  | 17.1 (9)  | 18.8 (9)  | 24.8 (11) | 7.7 (8)  | 2.5 (8)  | -0.1 (8) |
| C26  | 15.4 (8)  | 20.8 (9)  | 18.5 (10) | 1.1 (7)  | 4.5 (7)  | -4.5 (7) |
| C30  | 18.6 (9)  | 18.6 (9)  | 15.8 (9)  | -1.9 (7) | 8.3 (7)  | -0.7 (8) |
| C31  | 20.1 (9)  | 16.6 (9)  | 14.7 (9)  | -0.4 (7) | 8.2 (7)  | 1.3 (7)  |
| C32  | 17.1 (9)  | 18.5 (9)  | 13.4 (9)  | -0.1 (7) | 6.6 (7)  | 2.0 (7)  |
| C33  | 16.2 (9)  | 27.3 (10) | 16.2 (10) | 1.8 (8)  | 4.1 (7)  | -0.4 (8) |
| C34  | 20.2 (10) | 36.3 (11) | 17.2 (10) | 6.5 (9)  | 5.1 (8)  | 9.4 (9)  |
| C35  | 34.2 (11) | 22.2 (10) | 24.7 (11) | 7.0 (8)  | 12.9 (9) | 11.6 (8) |
| C36  | 29.5 (10) | 18.2 (10) | 19.2 (10) | 1.1 (8)  | 10.6 (8) | 0.6 (8)  |
| B1   | 16.5 (9)  | 16.1 (10) | 17.7 (10) | 2.1 (8)  | 4.8 (8)  | 1.3 (8)  |
| N1   | 14.1 (7)  | 14.8 (7)  | 19.1 (8)  | -1.3 (6) | 5.8 (6)  | 0.7 (6)  |
| C1   | 15.5 (8)  | 17.6 (9)  | 18.7 (10) | -3.2 (7) | 7.3 (7)  | 0.9 (7)  |
| C2   | 15.8 (9)  | 18.1 (9)  | 21.2 (10) | -2.6 (8) | 5.3 (7)  | 1.0 (7)  |
| C3   | 19.5 (10) | 20.5 (10) | 21.9 (10) | -1.1 (8) | 6.9 (8)  | -0.9 (8) |
| C4   | 21.4 (9)  | 21 (1)    | 23.2 (11) | 1.5 (8)  | 6.0 (8)  | -0.4 (8) |
| C5   | 13.1 (8)  | 18.7 (9)  | 17.6 (10) | -0.5 (8) | 4.3 (7)  | 1.2 (7)  |
| C6   | 22.2 (10) | 28.8 (11) | 21.7 (11) | 3.6 (8)  | 9.6 (8)  | 1.7 (8)  |
| C7   | 23.4 (10) | 31.2 (11) | 17.3 (10) | 2.2 (8)  | 4.9 (8)  | -1.1 (9) |
| C8   | 22.6 (10) | 37.1 (13) | 30.7 (12) | 0.5 (10) | 0.2 (9)  | 4.8 (9)  |
| C9   | 13.1 (8)  | 18.5 (9)  | 23.1 (10) | -1.8 (8) | 6.3 (7)  | -1.5 (7) |
| C10  | 16.5 (9)  | 17.8 (10) | 33.4 (12) | -4.8 (8) | 7.2 (9)  | 0.0 (7)  |
| C11  | 17.8 (9)  | 19.9 (10) | 24.8 (10) | -3.5 (8) | 3.9 (8)  | -1.1 (8) |
| C12  | 30.2 (11) | 31.2 (12) | 31.9 (12) | -1.3 (9) | 12.6 (9) | -9.9 (9) |
| C13  | 16.8 (8)  | 15.0 (9)  | 20.4 (9)  | -4.5 (7) | 7.1 (7)  | 0.3 (7)  |
| C14  | 17.9 (8)  | 16.6 (9)  | 24.1 (11) | -2.6 (8) | 8.6 (8)  | -0.9 (7) |
| C15  | 21.1 (9)  | 20.5 (10) | 30.9 (11) | -8.5 (9) | 11.7 (8) | -4.6 (8) |

C16      22.0 (9)      16.2 (9)      30.8 (12)      -1.3 (8)      7.0 (9)      -2.6 (7)

**Bond Lengths for compound 4.**

| <b>Atom</b> | <b>Atom</b> | <b>Length/Å</b> | <b>Atom</b> | <b>Atom</b> | <b>Length/Å</b> |
|-------------|-------------|-----------------|-------------|-------------|-----------------|
| O20         | C20         | 1.218 (3)       | C32         | C33         | 1.401 (3)       |
| O21         | C20         | 1.325 (2)       | C33         | C34         | 1.377 (3)       |
| O21         | B1          | 1.491 (3)       | C34         | C35         | 1.397 (3)       |
| O22         | C22         | 1.342 (2)       | C35         | C36         | 1.387 (3)       |
| O22         | B1          | 1.445 (3)       | N1          | C1          | 1.520 (3)       |
| O30         | C30         | 1.214 (3)       | N1          | C5          | 1.527 (2)       |
| O31         | C30         | 1.325 (2)       | N1          | C9          | 1.516 (2)       |
| O31         | B1          | 1.486 (2)       | N1          | C13         | 1.522 (2)       |
| O32         | C32         | 1.343 (2)       | C1          | C2          | 1.520 (2)       |
| O32         | B1          | 1.449 (2)       | C2          | C3          | 1.522 (3)       |
| C20         | C21         | 1.482 (3)       | C3          | C4          | 1.528 (3)       |
| C21         | C22         | 1.402 (3)       | C5          | C6          | 1.525 (3)       |
| C21         | C26         | 1.399 (3)       | C6          | C7          | 1.537 (3)       |
| C22         | C23         | 1.399 (3)       | C7          | C8          | 1.517 (3)       |
| C23         | C24         | 1.384 (3)       | C9          | C10         | 1.525 (3)       |
| C24         | C25         | 1.393 (3)       | C10         | C11         | 1.534 (3)       |
| C25         | C26         | 1.383 (3)       | C11         | C12         | 1.515 (3)       |
| C30         | C31         | 1.482 (3)       | C13         | C14         | 1.519 (3)       |
| C31         | C32         | 1.394 (3)       | C14         | C15         | 1.526 (3)       |
| C31         | C36         | 1.399 (3)       | C15         | C16         | 1.521 (3)       |

**Bond Angles for compound 4.**

| <b>Atom Atom Atom</b> | <b>Angle/°</b> | <b>Atom Atom Atom</b> | <b>Angle/°</b> |
|-----------------------|----------------|-----------------------|----------------|
| C20 O21 B1            | 124.84 (15)    | C33 C34 C35           | 121.11 (18)    |
| C22 O22 B1            | 120.43 (16)    | C36 C35 C34           | 119.06 (19)    |
| C30 O31 B1            | 123.40 (15)    | C35 C36 C31           | 120.4 (2)      |
| C32 O32 B1            | 119.84 (15)    | O22 B1 O21            | 112.73 (16)    |
| O20 C20 O21           | 120.55 (17)    | O22 B1 O31            | 108.93 (16)    |
| O20 C20 C21           | 123.30 (18)    | O22 B1 O32            | 107.29 (16)    |
| O21 C20 C21           | 116.12 (17)    | O31 B1 O21            | 106.79 (15)    |
| C22 C21 C20           | 119.64 (17)    | O32 B1 O21            | 108.41 (16)    |
| C26 C21 C20           | 121.12 (18)    | O32 B1 O31            | 112.78 (16)    |
| C26 C21 C22           | 119.22 (17)    | C1 N1 C5              | 106.44 (14)    |
| O22 C22 C21           | 121.95 (17)    | C1 N1 C13             | 110.33 (15)    |
| O22 C22 C23           | 118.36 (18)    | C9 N1 C1              | 111.42 (15)    |
| C23 C22 C21           | 119.68 (18)    | C9 N1 C5              | 111.24 (14)    |
| C24 C23 C22           | 120.16 (19)    | C9 N1 C13             | 106.46 (14)    |
| C23 C24 C25           | 120.49 (18)    | C13 N1 C5             | 111.01 (14)    |
| C26 C25 C24           | 119.55 (18)    | C2 C1 N1              | 115.24 (15)    |
| C25 C26 C21           | 120.90 (19)    | C1 C2 C3              | 109.99 (16)    |
| O30 C30 O31           | 120.78 (18)    | C2 C3 C4              | 110.97 (17)    |
| O30 C30 C31           | 122.93 (18)    | C6 C5 N1              | 115.76 (16)    |
| O31 C30 C31           | 116.28 (17)    | C5 C6 C7              | 110.76 (17)    |
| C32 C31 C30           | 119.81 (17)    | C8 C7 C6              | 114.30 (18)    |
| C32 C31 C36           | 120.00 (18)    | N1 C9 C10             | 115.12 (16)    |
| C36 C31 C30           | 120.17 (18)    | C9 C10 C11            | 110.65 (16)    |
| O32 C32 C31           | 121.90 (17)    | C12 C11 C10           | 113.85 (18)    |
| O32 C32 C33           | 118.62 (17)    | C14 C13 N1            | 115.74 (16)    |
| C31 C32 C33           | 119.48 (18)    | C13 C14 C15           | 109.91 (17)    |
| C34 C33 C32           | 119.92 (19)    | C16 C15 C14           | 112.15 (18)    |

**Torsion Angles for compound 4.**

| <b>A</b> | <b>B</b> | <b>C</b> | <b>D</b> | <b>Angle/°</b> | <b>A</b> | <b>B</b> | <b>C</b> | <b>D</b> | <b>Angle/°</b> |
|----------|----------|----------|----------|----------------|----------|----------|----------|----------|----------------|
| O20      | C20      | C21      | C22      | 174.16 (17)    | C32      | O32      | B1       | O31      | -26.8 (2)      |
| O20      | C20      | C21      | C26      | -4.4 (3)       | C32      | C31      | C36      | C35      | 0.2 (3)        |
| O21      | C20      | C21      | C22      | -4.1 (2)       | C32      | C33      | C34      | C35      | 0.3 (3)        |
| O21      | C20      | C21      | C26      | 177.34 (16)    | C33      | C34      | C35      | C36      | 0.8 (3)        |
| O22      | C22      | C23      | C24      | -178.69 (17)   | C34      | C35      | C36      | C31      | -1.0 (3)       |
| O30      | C30      | C31      | C32      | 175.91 (19)    | C36      | C31      | C32      | O32      | -179.14 (18)   |
| O30      | C30      | C31      | C36      | -2.2 (3)       | C36      | C31      | C32      | C33      | 0.9 (3)        |
| O31      | C30      | C31      | C32      | -3.1 (3)       | B1       | O21      | C20      | O20      | 174.72 (17)    |
| O31      | C30      | C31      | C36      | 178.74 (18)    | B1       | O21      | C20      | C21      | -6.9 (2)       |
| O32      | C32      | C33      | C34      | 178.89 (19)    | B1       | O22      | C22      | C21      | 15.5 (3)       |
| C20      | O21      | B1       | O22      | 20.6 (2)       | B1       | O22      | C22      | C23      | -165.99 (16)   |
| C20      | O21      | B1       | O31      | -99.04 (19)    | B1       | O31      | C30      | O30      | 168.19 (19)    |
| C20      | O21      | B1       | O32      | 139.17 (16)    | B1       | O31      | C30      | C31      | -12.8 (3)      |
| C20      | C21      | C22      | O22      | -0.1 (3)       | B1       | O32      | C32      | C31      | 13.5 (3)       |
| C20      | C21      | C22      | C23      | -178.65 (16)   | B1       | O32      | C32      | C33      | -166.54 (18)   |
| C20      | C21      | C26      | C25      | 178.54 (18)    | N1       | C1       | C2       | C3       | -176.83 (16)   |
| C21      | C22      | C23      | C24      | -0.1 (3)       | N1       | C5       | C6       | C7       | 158.58 (17)    |
| C22      | O22      | B1       | O21      | -24.2 (2)      | N1       | C9       | C10      | C11      | 163.65 (17)    |
| C22      | O22      | B1       | O31      | 94.17 (19)     | N1       | C13      | C14      | C15      | 169.29 (16)    |
| C22      | O22      | B1       | O32      | -143.46 (16)   | C1       | N1       | C5       | C6       | 173.41 (16)    |
| C22      | C21      | C26      | C25      | 0.0 (3)        | C1       | N1       | C9       | C10      | -59.7 (2)      |
| C22      | C23      | C24      | C25      | 0.4 (3)        | C1       | N1       | C13      | C14      | 49.3 (2)       |
| C23      | C24      | C25      | C26      | -0.5 (3)       | C1       | C2       | C3       | C4       | 178.99 (16)    |
| C24      | C25      | C26      | C21      | 0.3 (3)        | C5       | N1       | C1       | C2       | -177.31 (15)   |
| C26      | C21      | C22      | O22      | 178.41 (17)    | C5       | N1       | C9       | C10      | 58.9 (2)       |
| C26      | C21      | C22      | C23      | -0.1 (3)       | C5       | N1       | C13      | C14      | -68.5 (2)      |
| C30      | O31      | B1       | O21      | -91.7 (2)      | C5       | C6       | C7       | C8       | 62.7 (2)       |
| C30      | O31      | B1       | O22      | 146.31 (17)    | C9       | N1       | C1       | C2       | -55.9 (2)      |
| C30      | O31      | B1       | O32      | 27.3 (3)       | C9       | N1       | C5       | C6       | 51.9 (2)       |
| C30      | C31      | C32      | O32      | 2.7 (3)        | C9       | N1       | C13      | C14      | 170.32 (16)    |
| C30      | C31      | C32      | C33      | -177.22 (18)   | C9       | C10      | C11      | C12      | 60.1 (2)       |
| C30      | C31      | C36      | C35      | 178.3 (2)      | C13      | N1       | C1       | C2       | 62.2 (2)       |
| C31      | C32      | C33      | C34      | -1.2 (3)       | C13      | N1       | C5       | C6       | -66.5 (2)      |
| C32      | O32      | B1       | O21      | 91.2 (2)       | C13      | N1       | C9       | C10      | 179.96 (17)    |
| C32      | O32      | B1       | O22      | -146.80 (17)   | C13      | C14      | C15      | C16      | 175.65 (17)    |

**Hydrogen Atom Coordinates ( $\text{\AA}\times 10^4$ ) and Isotropic Displacement Parameters ( $\text{\AA}^2\times 10^3$ ) for compound 4.**

| <b>Atom</b> | <b>x</b> | <b>y</b> | <b>z</b> | <b>U(eq)</b> |
|-------------|----------|----------|----------|--------------|
| H23         | 4830     | 1713     | 2338     | 22           |
| H24         | 5845     | 714      | 3999     | 25           |
| H25         | 5473     | 1114     | 5765     | 26           |
| H26         | 4114     | 2534     | 5868     | 22           |
| H33         | -1048    | 4963     | -414     | 24           |
| H34         | -1665    | 6524     | -1268    | 30           |
| H35         | 72       | 7836     | -743     | 32           |
| H36         | 2470     | 7551     | 628      | 26           |
| H1A         | 9161     | 7612     | 4855     | 20           |
| H1B         | 8355     | 6556     | 4508     | 20           |
| H2A         | 11527    | 6833     | 5562     | 22           |
| H2B         | 10761    | 5767     | 5159     | 22           |
| H3A         | 9441     | 5940     | 6512     | 25           |
| H3B         | 10235    | 6996     | 6924     | 25           |
| H4A         | 11863    | 5159     | 7223     | 33           |
| H4B         | 11480    | 5702     | 8264     | 33           |
| H4C         | 12596    | 6217     | 7701     | 33           |
| H5A         | 7042     | 7188     | 2538     | 20           |
| H5B         | 7857     | 8218     | 3031     | 20           |
| H6A         | 8261     | 7355     | 1011     | 28           |
| H6B         | 8439     | 8504     | 1392     | 28           |
| H7A         | 6176     | 8225     | -243     | 29           |
| H7B         | 5611     | 7476     | 543      | 29           |
| H8A         | 4419     | 9014     | 438      | 49           |
| H8B         | 6005     | 9566     | 960      | 49           |
| H8C         | 5475     | 8820     | 1773     | 49           |
| H9A         | 10749    | 7612     | 2525     | 22           |
| H9B         | 11624    | 7185     | 3813     | 22           |
| H10A        | 10630    | 8646     | 4556     | 28           |
| H10B        | 10226    | 9089     | 3251     | 28           |
| H11A        | 12615    | 9676     | 4489     | 26           |
| H11B        | 13202    | 8556     | 4758     | 26           |
| H12A        | 12422    | 9474     | 2498     | 46           |
| H12B        | 13031    | 8357     | 2778     | 46           |
| H12C        | 14103    | 9276     | 3361     | 46           |
| H13A        | 9270     | 6099     | 1960     | 21           |
| H13B        | 10395    | 5725     | 3204     | 21           |
| H14A        | 7217     | 5590     | 2606     | 23           |
| H14B        | 8450     | 5067     | 3712     | 23           |

|      |      |      |      |    |
|------|------|------|------|----|
| H15A | 7911 | 4566 | 1290 | 28 |
| H15B | 9237 | 4082 | 2363 | 28 |
| H16A | 6131 | 3838 | 2043 | 35 |
| H16B | 7480 | 3316 | 3062 | 35 |
| H16C | 7127 | 3005 | 1715 | 35 |



**Table 6 Crystal data and structure refinement for Compound 5.**

|                                             |                                                                                               |
|---------------------------------------------|-----------------------------------------------------------------------------------------------|
| Identification code                         | gem39CuLT                                                                                     |
| Empirical formula                           | C <sub>43</sub> H <sub>42</sub> B <sub>2</sub> Cl <sub>4</sub> N <sub>2</sub> O <sub>13</sub> |
| Formula weight                              | 958.20                                                                                        |
| Temperature/K                               | 99.9(3)                                                                                       |
| Crystal system                              | monoclinic                                                                                    |
| Space group                                 | P2 <sub>1</sub>                                                                               |
| a/Å                                         | 12.1841(4)                                                                                    |
| b/Å                                         | 10.7394(3)                                                                                    |
| c/Å                                         | 16.5166(7)                                                                                    |
| α/°                                         | 90                                                                                            |
| β/°                                         | 98.350(3)                                                                                     |
| γ/°                                         | 90                                                                                            |
| Volume/Å <sup>3</sup>                       | 2138.29(13)                                                                                   |
| Z                                           | 2                                                                                             |
| ρ <sub>calc</sub> /g/cm <sup>3</sup>        | 1.488                                                                                         |
| μ/mm <sup>-1</sup>                          | 3.108                                                                                         |
| F(000)                                      | 992.0                                                                                         |
| Crystal size/mm <sup>3</sup>                | 0.35 × 0.03 × 0.02                                                                            |
| Radiation                                   | CuKα (λ = 1.54178)                                                                            |
| 2θ range for data collection/°              | 8.458 to 134.998                                                                              |
| Index ranges                                | -14 ≤ h ≤ 14, -12 ≤ k ≤ 12, -19 ≤ l ≤ 19                                                      |
| Reflections collected                       | 13467                                                                                         |
| Independent reflections                     | 13467 [R <sub>int</sub> = ?, R <sub>sigma</sub> = 0.0285]                                     |
| Data/restraints/parameters                  | 13467/2/594                                                                                   |
| Completeness to theta = 66.5°               | 99.9%                                                                                         |
| Goodness-of-fit on F <sup>2</sup>           | 1.022                                                                                         |
| Final R indexes [I ≥ 2σ (I)]                | R <sub>1</sub> = 0.0520, wR <sub>2</sub> = 0.1421                                             |
| Final R indexes [all data]                  | R <sub>1</sub> = 0.0564, wR <sub>2</sub> = 0.1445                                             |
| Largest diff. peak/hole / e Å <sup>-3</sup> | 0.45/-0.35                                                                                    |
| Flack parameter                             | 0.019(12)                                                                                     |

**Fractional Atomic Coordinates ( $\times 10^4$ ) and Equivalent Isotropic Displacement Parameters ( $\text{\AA}^2 \times 10^3$ ) for Compound 5.  $U_{\text{eq}}$  is defined as 1/3 of of the trace of the orthogonalised  $U_{ij}$  tensor.**

| Atom | <i>x</i>     | <i>y</i>    | <i>z</i>    | $U(\text{eq})$ |
|------|--------------|-------------|-------------|----------------|
| B1   | 2507 (6)     | 3045 (7)    | 4409 (4)    | 20.2 (14)      |
| Cl1  | 7209.2 (13)  | 887.2 (15)  | 3318.4 (9)  | 26.0 (3)       |
| Cl2  | -2845.1 (14) | 4667.3 (18) | 3907.9 (12) | 36.8 (4)       |
| O10  | 4154 (4)     | 4519 (5)    | 3047 (3)    | 25.3 (10)      |
| O11  | 2964 (4)     | 4009 (4)    | 3887 (3)    | 20.2 (9)       |
| O12  | 3393 (4)     | 2354 (4)    | 4895 (3)    | 22 (1)         |
| O20  | 267 (4)      | 1462 (4)    | 3173 (3)    | 22.3 (9)       |
| O21  | 1854 (4)     | 2155 (4)    | 3845 (3)    | 21.0 (9)       |
| O22  | 1874 (4)     | 3665 (4)    | 4954 (3)    | 23 (1)         |
| C10  | 3861 (5)     | 3803 (6)    | 3554 (4)    | 19.3 (13)      |
| C11  | 4532 (5)     | 2697 (6)    | 3850 (4)    | 19.5 (12)      |
| C12  | 4264 (5)     | 2041 (6)    | 4537 (4)    | 19.1 (12)      |
| C13  | 4957 (6)     | 1046 (6)    | 4848 (4)    | 23.0 (13)      |
| C14  | 5855 (5)     | 705 (6)     | 4480 (4)    | 21.6 (13)      |
| C15  | 6084 (5)     | 1353 (6)    | 3786 (4)    | 20.7 (12)      |
| C16  | 5435 (5)     | 2343 (6)    | 3478 (4)    | 19.4 (13)      |
| C20  | 761 (5)      | 2217 (6)    | 3639 (4)    | 17.0 (12)      |
| C21  | 187 (5)      | 3203 (6)    | 4049 (4)    | 18.2 (12)      |
| C22  | 793 (6)      | 3862 (6)    | 4713 (4)    | 19.6 (12)      |
| C23  | 220 (6)      | 4710 (6)    | 5144 (4)    | 23.4 (13)      |
| C24  | -887 (6)     | 4937 (7)    | 4901 (4)    | 26.0 (14)      |
| C25  | -1455 (6)    | 4322 (7)    | 4223 (4)    | 25.3 (14)      |
| C26  | -930 (5)     | 3446 (6)    | 3806 (4)    | 22.0 (13)      |
| B2   | 2666 (6)     | 2344 (7)    | 673 (4)     | 18.9 (14)      |
| Cl1A | 7883.6 (13)  | 4396.6 (16) | 1620.1 (10) | 29.8 (4)       |
| Cl2A | -2367.3 (15) | 332.6 (18)  | 1198.9 (11) | 33.3 (4)       |
| O10A | 4959 (4)     | 698 (4)     | 1819 (3)    | 24.3 (10)      |
| O11A | 3370 (4)     | 1347 (4)    | 1138 (3)    | 21.0 (9)       |
| O12A | 3319 (4)     | 3138 (5)    | 219 (3)     | 24.3 (10)      |
| O20A | 839 (4)      | 3733 (4)    | 1938 (3)    | 23.8 (10)      |
| O21A | 2211 (4)     | 3121 (4)    | 1288 (3)    | 20.4 (9)       |
| O22A | 1831 (4)     | 1732 (5)    | 105 (3)     | 25.4 (10)      |
| C10A | 4416 (5)     | 1504 (6)    | 1397 (4)    | 18.3 (12)      |
| C11A | 4966 (5)     | 2652 (6)    | 1144 (4)    | 17.0 (12)      |
| C12A | 4360 (5)     | 3417 (6)    | 553 (4)     | 18.2 (12)      |
| C13A | 4872 (6)     | 4477 (7)    | 279 (4)     | 22.8 (13)      |
| C14A | 5953 (5)     | 4760 (6)    | 598 (4)     | 21.5 (13)      |
| C15A | 6534 (5)     | 3998 (6)    | 1198 (4)    | 19.7 (12)      |

|      |           |          |          |           |
|------|-----------|----------|----------|-----------|
| C16A | 6047 (6)  | 2939 (6) | 1465 (4) | 20.3 (13) |
| C20A | 1197 (6)  | 3015 (6) | 1460 (4) | 19.0 (12) |
| C21A | 503 (5)   | 2015 (6) | 1033 (4) | 18.4 (13) |
| C22A | 851 (5)   | 1441 (7) | 352 (4)  | 21.7 (13) |
| C23A | 149 (6)   | 580 (7)  | -97 (4)  | 29.7 (16) |
| C24A | -842 (6)  | 266 (8)  | 150 (4)  | 31.1 (16) |
| C25A | -1161 (5) | 809 (7)  | 847 (4)  | 24.3 (13) |
| C26A | -502 (5)  | 1699 (6) | 1282 (4) | 19.8 (13) |
| N1   | 1700 (5)  | 7494 (6) | 3187 (4) | 25.0 (12) |
| N16  | 3926 (5)  | 8427 (5) | 2021 (3) | 23.1 (12) |
| C31  | 807 (7)   | 6842 (7) | 3576 (5) | 35.4 (18) |
| C32  | -191 (6)  | 6537 (8) | 2941 (6) | 40.3 (19) |
| C33  | -646 (7)  | 7697 (9) | 2486 (7) | 52 (2)    |
| C34  | 274 (7)   | 8352 (9) | 2111 (7) | 47 (2)    |
| C35  | 1248 (6)  | 8670 (7) | 2759 (6) | 34.0 (17) |
| C36  | 2698 (6)  | 7719 (7) | 3814 (4) | 30.2 (15) |
| C37  | 3589 (6)  | 8507 (7) | 3495 (4) | 26.8 (15) |
| C38  | 3077 (6)  | 9714 (7) | 3152 (5) | 33.5 (17) |
| C39  | 2195 (6)  | 9381 (7) | 2434 (5) | 33.4 (16) |
| C40  | 2709 (6)  | 8631 (6) | 1770 (4) | 26.8 (15) |
| C41  | 4195 (5)  | 7822 (6) | 2859 (4) | 19.7 (13) |
| C42  | 5439 (6)  | 7799 (7) | 3087 (5) | 29.4 (15) |
| C43  | 6013 (6)  | 7110 (7) | 2466 (5) | 32.9 (17) |
| C44  | 5666 (6)  | 7671 (7) | 1617 (5) | 32.6 (16) |
| C45  | 4420 (7)  | 7697 (7) | 1398 (4) | 31.2 (16) |
| O1W  | 2293 (4)  | 5675 (4) | 2207 (3) | 23.1 (10) |

**Anisotropic Displacement Parameters ( $\text{\AA}^2 \times 10^3$ ) for Compound 5. The Anisotropic displacement factor exponent takes the form:  $-2\pi^2[h^2a^{*2}U_{11}+2hka^*b^*U_{12}+\dots]$ .**

| Atom | $U_{11}$ | $U_{22}$  | $U_{33}$  | $U_{23}$  | $U_{13}$  | $U_{12}$  |
|------|----------|-----------|-----------|-----------|-----------|-----------|
| B1   | 15 (3)   | 22 (4)    | 24 (3)    | 3 (3)     | 2 (3)     | 0 (3)     |
| Cl1  | 19.0 (7) | 25.7 (8)  | 33.2 (7)  | 2.4 (6)   | 4.0 (6)   | 3.7 (6)   |
| Cl2  | 19.5 (8) | 32.8 (10) | 56.2 (10) | -13.2 (8) | -0.6 (7)  | 4.6 (7)   |
| O10  | 23 (2)   | 18 (2)    | 34 (2)    | 5.5 (19)  | 3.3 (18)  | 0 (2)     |
| O11  | 19 (2)   | 13 (2)    | 28 (2)    | 2.2 (17)  | 0.6 (17)  | 0.1 (17)  |
| O12  | 19 (2)   | 23 (2)    | 23 (2)    | 0.9 (16)  | 0.5 (17)  | 2.7 (18)  |
| O20  | 23 (2)   | 17 (2)    | 26 (2)    | -4.3 (17) | -1.6 (17) | 0.9 (19)  |
| O21  | 20 (2)   | 16 (2)    | 26 (2)    | -4.2 (16) | 2.4 (18)  | 2.3 (18)  |
| O22  | 20 (2)   | 24 (2)    | 25 (2)    | -5.6 (17) | 0.1 (17)  | 0.8 (19)  |
| C10  | 16 (3)   | 15 (3)    | 26 (3)    | -3 (2)    | -2 (2)    | -5 (2)    |
| C11  | 18 (3)   | 17 (3)    | 22 (3)    | 0 (2)     | -3 (2)    | -5 (2)    |
| C12  | 13 (3)   | 21 (3)    | 22 (3)    | -2 (2)    | -2 (2)    | -3 (2)    |
| C13  | 22 (3)   | 24 (3)    | 21 (3)    | 5 (2)     | -4 (2)    | -1 (3)    |
| C14  | 18 (3)   | 21 (3)    | 23 (3)    | 2 (2)     | -4 (2)    | 2 (3)     |
| C15  | 15 (3)   | 20 (3)    | 26 (3)    | -1 (2)    | 0 (2)     | -1 (3)    |
| C16  | 18 (3)   | 17 (3)    | 23 (3)    | 0 (2)     | 1 (2)     | -3 (2)    |
| C20  | 16 (3)   | 16 (3)    | 18 (3)    | 0 (2)     | 1 (2)     | -1 (2)    |
| C21  | 20 (3)   | 11 (3)    | 23 (3)    | 1 (2)     | 3 (2)     | -1 (2)    |
| C22  | 22 (3)   | 17 (3)    | 19 (3)    | -2 (2)    | 1 (2)     | -3 (3)    |
| C23  | 26 (3)   | 20 (3)    | 24 (3)    | -4 (2)    | 5 (2)     | 0 (3)     |
| C24  | 25 (4)   | 24 (4)    | 30 (3)    | -5 (3)    | 10 (3)    | -3 (3)    |
| C25  | 19 (3)   | 20 (4)    | 36 (3)    | 1 (3)     | 3 (3)     | -3 (3)    |
| C26  | 20 (3)   | 23 (3)    | 23 (3)    | -2 (2)    | 2 (2)     | -2 (3)    |
| B2   | 9 (3)    | 21 (4)    | 26 (3)    | 0 (3)     | 0 (3)     | -2 (3)    |
| Cl1A | 19.7 (8) | 31.4 (9)  | 37.0 (8)  | 4.7 (7)   | -0.9 (6)  | -9.2 (7)  |
| Cl2A | 22.3 (8) | 37.8 (10) | 40.9 (9)  | -13.0 (7) | 8.0 (7)   | -12.9 (7) |
| O10A | 21 (2)   | 14 (2)    | 37 (2)    | 5.4 (18)  | 3.3 (18)  | -0.2 (19) |
| O11A | 16 (2)   | 13 (2)    | 34 (2)    | 0.3 (17)  | 3.2 (17)  | -3.0 (18) |
| O12A | 17 (2)   | 30 (3)    | 25 (2)    | 5.2 (18)  | -0.5 (17) | -5 (2)    |
| O20A | 23 (2)   | 17 (2)    | 31 (2)    | -6.5 (18) | 4.8 (18)  | -2.2 (19) |
| O21A | 16 (2)   | 17 (2)    | 27 (2)    | -3.9 (16) | 0.5 (17)  | -2.8 (17) |
| O22A | 19 (2)   | 31 (3)    | 26 (2)    | -9.0 (19) | 3.5 (18)  | -7 (2)    |
| C10A | 16 (3)   | 13 (3)    | 27 (3)    | 1 (2)     | 6 (2)     | 0 (2)     |
| C11A | 16 (3)   | 10 (3)    | 26 (3)    | 2 (2)     | 7 (2)     | -1 (2)    |
| C12A | 15 (3)   | 18 (3)    | 21 (3)    | 1 (2)     | 3 (2)     | -2 (2)    |
| C13A | 25 (3)   | 22 (3)    | 21 (3)    | 6 (2)     | 3 (2)     | 1 (3)     |
| C14A | 24 (3)   | 15 (3)    | 26 (3)    | 3 (2)     | 6 (2)     | -3 (3)    |
| C15A | 16 (3)   | 18 (3)    | 25 (3)    | 0 (2)     | 4 (2)     | -3 (2)    |
| C16A | 21 (3)   | 17 (3)    | 23 (3)    | 1 (2)     | 3 (2)     | 0 (2)     |

|      |        |        |         |           |        |           |
|------|--------|--------|---------|-----------|--------|-----------|
| C20A | 24 (3) | 10 (3) | 22 (3)  | 3 (2)     | 0 (2)  | 1 (2)     |
| C21A | 17 (3) | 16 (3) | 20 (3)  | 0 (2)     | -3 (2) | 1 (2)     |
| C22A | 15 (3) | 25 (3) | 24 (3)  | -2 (2)    | -1 (2) | 1 (3)     |
| C23A | 24 (4) | 35 (4) | 30 (3)  | -14 (3)   | 4 (3)  | -9 (3)    |
| C24A | 24 (4) | 34 (4) | 34 (3)  | -14 (3)   | 2 (3)  | -8 (3)    |
| C25A | 17 (3) | 28 (4) | 29 (3)  | -4 (3)    | 4 (2)  | -5 (3)    |
| C26A | 20 (3) | 18 (3) | 20 (3)  | 0 (2)     | -1 (2) | 0 (3)     |
| N1   | 22 (3) | 16 (3) | 40 (3)  | -2 (2)    | 13 (2) | 0 (2)     |
| N16  | 25 (3) | 15 (3) | 30 (3)  | 3 (2)     | 4 (2)  | -7 (2)    |
| C31  | 34 (4) | 25 (4) | 52 (4)  | 2 (3)     | 22 (3) | -6 (3)    |
| C32  | 22 (4) | 28 (4) | 74 (5)  | 3 (4)     | 17 (4) | -8 (3)    |
| C33  | 21 (4) | 33 (5) | 104 (8) | 12 (5)    | 12 (5) | 3 (4)     |
| C34  | 18 (4) | 31 (5) | 91 (7)  | 22 (4)    | 3 (4)  | -1 (3)    |
| C35  | 20 (4) | 15 (3) | 70 (5)  | 7 (3)     | 15 (3) | 4 (3)     |
| C36  | 33 (4) | 31 (4) | 29 (3)  | -7 (3)    | 11 (3) | -5 (3)    |
| C37  | 25 (3) | 25 (4) | 31 (3)  | -11 (3)   | 7 (3)  | -6 (3)    |
| C38  | 28 (4) | 17 (4) | 60 (5)  | -10 (3)   | 20 (3) | -8 (3)    |
| C39  | 20 (3) | 15 (3) | 66 (5)  | 10 (3)    | 10 (3) | 4 (3)     |
| C40  | 22 (3) | 15 (3) | 42 (4)  | 10 (3)    | -2 (3) | -5 (3)    |
| C41  | 20 (3) | 15 (3) | 25 (3)  | -1 (2)    | 2 (2)  | -1 (2)    |
| C42  | 23 (4) | 24 (4) | 40 (4)  | 3 (3)     | 0 (3)  | -4 (3)    |
| C43  | 19 (4) | 23 (4) | 59 (5)  | 10 (3)    | 10 (3) | 6 (3)     |
| C44  | 33 (4) | 22 (4) | 47 (4)  | 1 (3)     | 20 (3) | 1 (3)     |
| C45  | 41 (4) | 26 (4) | 28 (3)  | 0 (3)     | 8 (3)  | -9 (3)    |
| O1W  | 21 (2) | 12 (2) | 34 (2)  | -0.3 (17) | -3 (2) | -3.2 (19) |

**Bond Lengths for Compound 5.**

| Atom | Atom | Length/Å   | Atom | Atom | Length/Å   |
|------|------|------------|------|------|------------|
| B1   | O11  | 1.505 (8)  | O21A | C20A | 1.313 (8)  |
| B1   | O12  | 1.453 (8)  | O22A | C22A | 1.354 (8)  |
| B1   | O21  | 1.482 (8)  | C10A | C11A | 1.492 (8)  |
| B1   | O22  | 1.432 (8)  | C11A | C12A | 1.401 (9)  |
| C11  | C15  | 1.743 (7)  | C11A | C16A | 1.381 (9)  |
| C12  | C25  | 1.738 (7)  | C12A | C13A | 1.404 (9)  |
| O10  | C10  | 1.227 (8)  | C13A | C14A | 1.380 (9)  |
| O11  | C10  | 1.312 (8)  | C14A | C15A | 1.397 (9)  |
| O12  | C12  | 1.331 (8)  | C15A | C16A | 1.384 (9)  |
| O20  | C20  | 1.216 (8)  | C20A | C21A | 1.481 (9)  |
| O21  | C20  | 1.327 (8)  | C21A | C22A | 1.401 (9)  |
| O22  | C22  | 1.336 (8)  | C21A | C26A | 1.390 (9)  |
| C10  | C11  | 1.484 (9)  | C22A | C23A | 1.397 (9)  |
| C11  | C12  | 1.415 (9)  | C23A | C24A | 1.372 (10) |
| C11  | C16  | 1.389 (9)  | C24A | C25A | 1.395 (10) |
| C12  | C13  | 1.411 (9)  | C25A | C26A | 1.381 (9)  |
| C13  | C14  | 1.375 (9)  | N1   | C31  | 1.513 (9)  |
| C14  | C15  | 1.403 (9)  | N1   | C35  | 1.512 (9)  |
| C15  | C16  | 1.377 (9)  | N1   | C36  | 1.498 (9)  |
| C20  | C21  | 1.485 (9)  | N16  | C40  | 1.497 (9)  |
| C21  | C22  | 1.420 (8)  | N16  | C41  | 1.520 (8)  |
| C21  | C26  | 1.386 (9)  | N16  | C45  | 1.490 (9)  |
| C22  | C23  | 1.403 (9)  | C31  | C32  | 1.522 (12) |
| C23  | C24  | 1.372 (10) | C32  | C33  | 1.517 (12) |
| C24  | C25  | 1.394 (10) | C33  | C34  | 1.529 (12) |
| C25  | C26  | 1.377 (10) | C34  | C35  | 1.518 (12) |
| B2   | O11A | 1.511 (8)  | C35  | C39  | 1.544 (10) |
| B2   | O12A | 1.447 (9)  | C36  | C37  | 1.529 (10) |
| B2   | O21A | 1.483 (8)  | C37  | C38  | 1.512 (11) |
| B2   | O22A | 1.438 (8)  | C37  | C41  | 1.554 (9)  |
| C11A | C15A | 1.743 (6)  | C38  | C39  | 1.522 (11) |
| C12A | C25A | 1.735 (7)  | C39  | C40  | 1.564 (11) |
| O10A | C10A | 1.241 (8)  | C41  | C42  | 1.508 (9)  |
| O11A | C10A | 1.295 (8)  | C42  | C43  | 1.517 (11) |
| O12A | C12A | 1.341 (7)  | C43  | C44  | 1.528 (11) |
| O20A | C20A | 1.227 (8)  | C44  | C45  | 1.509 (11) |

**Bond Angles for Compound 5.**

| Atom | Atom | Atom | Angle/°   | Atom | Atom | Atom | Angle/°   |
|------|------|------|-----------|------|------|------|-----------|
| O12  | B1   | O11  | 111.1 (5) | C16A | C11A | C12A | 121.0 (6) |
| O12  | B1   | O21  | 107.8 (6) | O12A | C12A | C11A | 121.8 (6) |
| O21  | B1   | O11  | 107.0 (5) | O12A | C12A | C13A | 119.1 (6) |
| O22  | B1   | O11  | 108.5 (6) | C11A | C12A | C13A | 119.0 (6) |
| O22  | B1   | O12  | 108.4 (5) | C14A | C13A | C12A | 120.0 (6) |
| O22  | B1   | O21  | 114.0 (6) | C13A | C14A | C15A | 119.9 (6) |
| C10  | O11  | B1   | 121.6 (5) | C14A | C15A | C11A | 119.4 (5) |
| C12  | O12  | B1   | 117.4 (5) | C16A | C15A | C11A | 119.9 (5) |
| C20  | O21  | B1   | 123.7 (5) | C16A | C15A | C14A | 120.7 (6) |
| C22  | O22  | B1   | 118.9 (5) | C11A | C16A | C15A | 119.3 (6) |
| O10  | C10  | O11  | 121.6 (6) | O20A | C20A | O21A | 121.2 (6) |
| O10  | C10  | C11  | 121.7 (6) | O20A | C20A | C21A | 122.1 (6) |
| O11  | C10  | C11  | 116.7 (5) | O21A | C20A | C21A | 116.7 (6) |
| C12  | C11  | C10  | 118.9 (6) | C22A | C21A | C20A | 118.9 (6) |
| C16  | C11  | C10  | 120.5 (6) | C26A | C21A | C20A | 120.2 (6) |
| C16  | C11  | C12  | 120.6 (6) | C26A | C21A | C22A | 120.8 (6) |
| O12  | C12  | C11  | 121.5 (6) | O22A | C22A | C21A | 121.5 (6) |
| O12  | C12  | C13  | 120.2 (6) | O22A | C22A | C23A | 119.4 (6) |
| C13  | C12  | C11  | 118.2 (6) | C23A | C22A | C21A | 119.0 (6) |
| C14  | C13  | C12  | 120.9 (6) | C24A | C23A | C22A | 120.1 (6) |
| C13  | C14  | C15  | 119.6 (6) | C23A | C24A | C25A | 120.4 (6) |
| C14  | C15  | C11  | 118.8 (5) | C24A | C25A | C12A | 120.3 (5) |
| C16  | C15  | C11  | 120.2 (5) | C26A | C25A | C12A | 119.1 (5) |
| C16  | C15  | C14  | 120.9 (6) | C26A | C25A | C24A | 120.5 (6) |
| C15  | C16  | C11  | 119.7 (6) | C25A | C26A | C21A | 119.0 (6) |
| O20  | C20  | O21  | 121.0 (6) | C35  | N1   | C31  | 110.4 (6) |
| O20  | C20  | C21  | 122.8 (6) | C36  | N1   | C31  | 110.1 (6) |
| O21  | C20  | C21  | 116.1 (5) | C36  | N1   | C35  | 113.1 (6) |
| C22  | C21  | C20  | 118.8 (6) | C40  | N16  | C41  | 112.9 (5) |
| C26  | C21  | C20  | 120.7 (6) | C45  | N16  | C40  | 111.6 (6) |
| C26  | C21  | C22  | 120.5 (6) | C45  | N16  | C41  | 110.4 (5) |
| O22  | C22  | C21  | 122.0 (6) | N1   | C31  | C32  | 111.0 (6) |
| O22  | C22  | C23  | 119.6 (6) | C33  | C32  | C31  | 111.3 (7) |
| C23  | C22  | C21  | 118.3 (6) | C32  | C33  | C34  | 110.0 (7) |
| C24  | C23  | C22  | 120.5 (6) | C35  | C34  | C33  | 111.2 (8) |
| C23  | C24  | C25  | 120.2 (6) | N1   | C35  | C34  | 109.7 (6) |
| C24  | C25  | C12  | 119.2 (6) | N1   | C35  | C39  | 109.6 (6) |
| C26  | C25  | C12  | 120.0 (5) | C34  | C35  | C39  | 114.4 (7) |
| C26  | C25  | C24  | 120.9 (6) | N1   | C36  | C37  | 113.4 (6) |
| C25  | C26  | C21  | 119.5 (6) | C36  | C37  | C41  | 113.7 (6) |

|                |      |           |     |     |     |           |
|----------------|------|-----------|-----|-----|-----|-----------|
| O12AB2         | O11A | 111.5 (5) | C38 | C37 | C36 | 109.2 (6) |
| O12AB2         | O21A | 108.2 (5) | C38 | C37 | C41 | 111.3 (6) |
| O21AB2         | O11A | 106.9 (5) | C37 | C38 | C39 | 107.3 (6) |
| O22AB2         | O11A | 107.6 (5) | C35 | C39 | C40 | 112.6 (6) |
| O22AB2         | O12A | 108.8 (5) | C38 | C39 | C35 | 108.9 (7) |
| O22AB2         | O21A | 113.9 (5) | C38 | C39 | C40 | 110.9 (6) |
| C10A O11AB2    |      | 122.3 (5) | N16 | C40 | C39 | 111.3 (6) |
| C12A O12AB2    |      | 118.5 (5) | N16 | C41 | C37 | 110.6 (5) |
| C20A O21AB2    |      | 123.8 (5) | C42 | C41 | N16 | 108.1 (5) |
| C22A O22AB2    |      | 118.7 (5) | C42 | C41 | C37 | 113.4 (6) |
| O10AC10A O11A  |      | 120.9 (6) | C41 | C42 | C43 | 112.6 (6) |
| O10AC10A C11A  |      | 120.6 (6) | C42 | C43 | C44 | 109.6 (6) |
| O11AC10A C11A  |      | 118.4 (5) | C45 | C44 | C43 | 111.3 (6) |
| C12A C11A C10A |      | 117.8 (6) | N16 | C45 | C44 | 109.7 (6) |
| C16A C11A C10A |      | 121.2 (6) |     |     |     |           |



**Hydrogen Bonds for Compound 5.**

| <b>D</b> | <b>H</b> | <b>A</b>          | <b>d(D-H)/Å</b> | <b>d(H-A)/Å</b> | <b>d(D-A)/Å</b> | <b>D-H-A/°</b> |
|----------|----------|-------------------|-----------------|-----------------|-----------------|----------------|
| N1       | H1       | O1W               | 0.78 (11)       | 1.94 (12)       | 2.701 (8)       | 167 (12)       |
| N16      | H16      | O10A <sup>1</sup> | 0.79 (10)       | 2.01 (10)       | 2.787 (7)       | 166 (8)        |
| O1WH1WA  | O20A     |                   | 0.81 (8)        | 1.96 (9)        | 2.730 (7)       | 157 (12)       |
| O1WH1WB  | O10      |                   | 0.81 (7)        | 1.96 (7)        | 2.774 (6)       | 177 (10)       |

<sup>1</sup>+X,1+Y,+Z

**Hydrogen Atom Coordinates ( $\text{\AA}\times 10^4$ ) and Isotropic Displacement Parameters ( $\text{\AA}^2\times 10^3$ ) for Compound 5.**

| Atom | x         | y          | z         | U(eq)   |
|------|-----------|------------|-----------|---------|
| H13  | 4802      | 606        | 5317      | 28      |
| H14  | 6317      | 35         | 4695      | 26      |
| H16A | 5605      | 2782       | 3012      | 23      |
| H23  | 601       | 5131       | 5608      | 28      |
| H24  | -1268     | 5515       | 5196      | 31      |
| H26  | -1329     | 3012       | 3356      | 26      |
| H13A | 4473      | 4999       | -126      | 27      |
| H14A | 6302      | 5473       | 409       | 26      |
| H16B | 6452      | 2415       | 1865      | 24      |
| H23A | 359       | 212        | -575      | 36      |
| H24A | -1313     | -324       | -155      | 37      |
| H26A | -732      | 2089       | 1745      | 24      |
| H1   | 1880 (90) | 7060 (110) | 2860 (70) | 60 (30) |
| H16  | 4230 (70) | 9090 (90)  | 2050 (50) | 30 (20) |
| H31A | 572       | 7383       | 4005      | 42      |
| H31B | 1111      | 6063       | 3841      | 42      |
| H32A | 29        | 5926       | 2545      | 48      |
| H32B | -778      | 6154       | 3215      | 48      |
| H33A | -949      | 8269       | 2869      | 63      |
| H33B | -1256     | 7465       | 2049      | 63      |
| H34A | 529       | 7804       | 1694      | 57      |
| H34B | -23       | 9125       | 1835      | 57      |
| H35  | 963       | 9211       | 3176      | 41      |
| H36A | 3024      | 6907       | 4003      | 36      |
| H36B | 2461      | 8144       | 4292      | 36      |
| H37  | 4158      | 8721       | 3973      | 32      |
| H38A | 3650      | 10253      | 2966      | 40      |
| H38B | 2738      | 10165      | 3576      | 40      |
| H39  | 1883      | 10174      | 2179      | 40      |
| H40A | 2331      | 7815       | 1684      | 32      |
| H40B | 2588      | 9091       | 1246      | 32      |
| H41  | 3924      | 6942       | 2815      | 24      |
| H42A | 5629      | 7394       | 3628      | 35      |
| H42B | 5719      | 8665       | 3136      | 35      |
| H43A | 5809      | 6218       | 2460      | 40      |
| H43B | 6828      | 7175       | 2617      | 40      |
| H44A | 5959      | 8530       | 1606      | 39      |
| H44B | 5990      | 7174       | 1206      | 39      |
| H45A | 4215      | 8080       | 851       | 37      |

|      |           |            |           |         |
|------|-----------|------------|-----------|---------|
| H45B | 4126      | 6836       | 1375      | 37      |
| HIWA | 1760 (80) | 5240 (110) | 2040 (70) | 70 (40) |
| HIWB | 2840 (70) | 5360 (100) | 2460 (50) | 50 (30) |
